# Supplementary material for: A nickel-catalyzed carbon–sulfur cross-coupling reaction with disulfides enabled by mechanochemistry
Source: Royal Society of Chemistry journal article supplement (doi:10.1039/d4qo00069b), 2024-01-01
Supplement: d4qo00069b1.pdf [file d4qo00069b1.pdf]

# **A nickel-catalyzed carbon-sulfur cross-coupling reaction with disulfides enabled by mechanochemistry**

Xiujia Hao, Daming Feng\*, Peng Huang, Fang Guo\*

College of Chemistry, Liaoning University, Shenyang 110036 China

E-mail: [dmfeng@lnu.edu.cn](mailto:dmfeng@lnu.edu.cn); [fguo@lnu.edu.cn](mailto:fguo@lnu.edu.cn)

## **Supporting Information**

### **Table of Contents**

|                                                               |           |
|---------------------------------------------------------------|-----------|
| <b>1. General Information .....</b>                           | <b>1</b>  |
| <b>2. General procedures for the experiments .....</b>        | <b>2</b>  |
| <b>3. Optimisation studies .....</b>                          | <b>6</b>  |
| <b>4. Characterisation Data .....</b>                         | <b>9</b>  |
| <b>5. Spectroscopic Data .....</b>                            | <b>17</b> |
| <b>6. Green metrics for the C-S bond cross-coupling .....</b> | <b>79</b> |
| <b>References .....</b>                                       | <b>85</b> |

# 1. General Information

All chemicals were obtained from commercial sources and used without further purification.  $^1\text{H}$  NMR and  $^{13}\text{C}$  NMR spectra were obtained on Varian Mercury-VX300 and Bruker AVIII-400 spectrometers. Mass spectral data were obtained on a GCM-SQF2020V. All compounds were detected by ultraviolet light (254 nm and 365 nm) and iodine vapour. The synthesized products were purified by silica gel column chromatography. The ball mill used was a Retsch MM 400 mixing mill. Unless otherwise stated, the mechanochemical reactions were performed in 25 mL stainless steel jars with one stainless steel ball of 14 mm. Mechanochemical reactions were performed using mills and jars without any modifications or temperature control system.

## 2. General procedures for the experiments

### 2.1 General Procedure

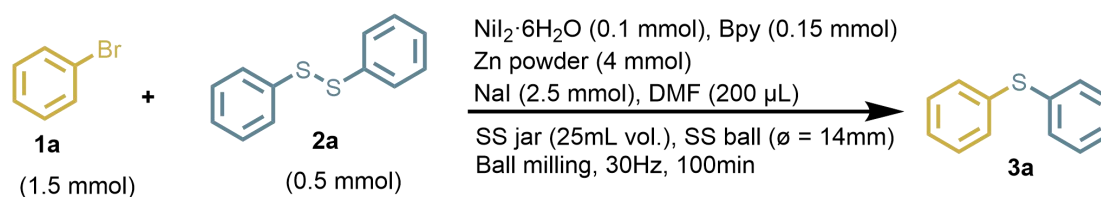

To a 25 mL stainless steel Jar was added a 14 mm stainless steel milling ball. A mixture of bromobenzene (1.5 mmol), phenyl disulfide (0.5 mmol, 109 mg),  $\text{NiI}_2 \cdot 6\text{H}_2\text{O}$  (0.1 mmol, 10 mol%), 2,2'-bipyridine (0.15 mmol, 15 mol%), DMF (200  $\mu\text{L}$ ), Zinc Powder (4 mmol, 8 equiv.) and NaI (2.5 mmol) were added to the jar, which was closed and placed on a ball mill. The reaction was milled for 100 min at 30 Hz. After the milling, the jar was opened and the mixture was rinsed into a conical flask using EtOAc (~40 mL). The mixture was filtered and concentrated under reduced pressure. The crude product was purified by column chromatography using petroleum as eluent to afford pure products. The procedure is applied for the preparation of all compounds. The identity and purity of the known products were determined by  $^1\text{H}$  NMR and  $^{13}\text{C}$  NMR spectroscopic analysis.

### 2.2 Procedure for the gram scale experiments

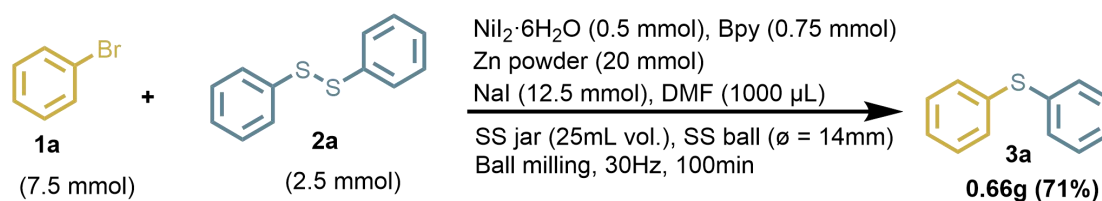

To a 25 mL stainless steel Jar was added a 14 mm stainless steel milling ball. A mixture of bromobenzene (7.5 mmol), phenyl disulfide (2.5 mmol, 546 mg),  $\text{NiI}_2 \cdot 6\text{H}_2\text{O}$  (0.21 g, 0.5 mmol, 10 mol%), 2,2'-bipyridine (0.117 g, 0.75 mmol, 15 mol%), DMF (1000  $\mu\text{L}$ ), Zinc Powder (1.308 g, 20 mmol, 8 equiv.) and NaI (1.874 g, 12.5 mmol) were all added to the jar, which was closed and placed on a ball mill. The reaction was milled for 100 min at 30 Hz. After the milling period, the jar was opened and the mixture was rinsed into a conical flask using EtOAc (100 mL). The mixture was filtered and concentrated under reduced pressure. The crude product was purified by column chromatography using petroleum as eluent to afford pure products. The yield of coupled product was determined to be 71% by column chromatography.

### 2.3 Procedure for radical trapping experiments

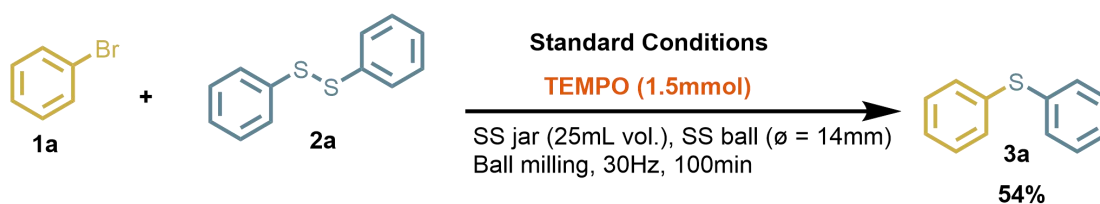

To a 25 mL stainless steel Jar was added a 14 mm stainless steel milling ball. A mixture of bromobenzene (1.5 mmol), phenyl disulfide (0.5 mmol, 109 mg),  $\text{NiI}_2 \cdot 6\text{H}_2\text{O}$  (0.1 mmol, 10 mol%), 2,2'-bipyridine (0.15 mmol, 15 mol%), DMF (200  $\mu\text{L}$ ), Zinc Powder (4 mmol, 8 equiv.) TEMPO (0.234 g, 3 equiv.) and NaI (2.5 mmol) were all added to the jar, which was closed and placed on a ball mill. The reaction was milled for 100 min at 30 Hz. After the milling period, the jar was opened and the mixture was rinsed into a conical flask using EtOAc (~40 mL). The mixture was filtered and concentrated under reduced pressure. The crude product was purified by column chromatography using petroleum as eluent to afford pure products. The yield of coupled product was determined to be 54% by column chromatography.

### 2.4 Control experiments

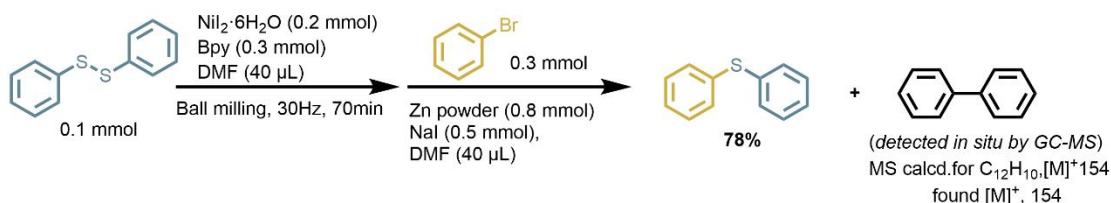

To a 25 mL stainless steel jar was added a 14 mm stainless steel milling ball. Phenyl disulfide (0.1 mmol, 218 mg),  $\text{NiI}_2 \cdot 6\text{H}_2\text{O}$  (0.2 mmol, 20 mol%), 2,2'-bipyridine (0.3 mmol; 30 mol%) and DMF (40  $\mu\text{L}$ ) were added to the tank and allowed to react for 70 min. When the reaction is complete, quickly add bromobenzene (0.3 mmol), zinc powder (0.8 mmol, 8 equiv.), NaI (0.5 mmol) and DMF (40  $\mu\text{L}$ ), and place on a ball mill. Grinding was continued at 30 Hz for 100 minutes. After the milling period, the jar was opened and the mixture was rinsed into a conical flask using EtOAc (~40 mL). The mixture was filtered and concentrated under reduced pressure. The crude product was purified by column chromatography using petroleum as eluent to afford pure products. The yield of coupled product was determined to be 78% by column chromatography, and biphenyl was monitored by GC-MS.

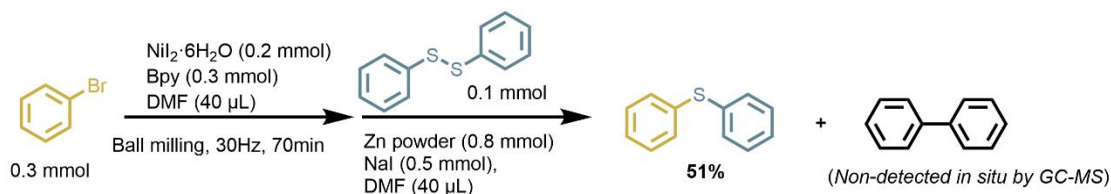

To a 25 mL stainless steel jar was added a 14 mm stainless steel milling ball. Bromobenzene (0.3 mmol),  $\text{NiI}_2 \cdot 6\text{H}_2\text{O}$  (0.2 mmol, 20 mol%), 2,2'-bipyridine (0.3 mmol; 30 mol%) and DMF (40  $\mu\text{L}$ ) were added to the tank and allowed to react for 70 min. When the reaction is complete, quickly add phenyl disulfide (0.1 mmol, 218 mg), zinc powder (0.8 mmol, 8 equiv.), NaI (0.5 mmol) and DMF (40  $\mu\text{L}$ ), and place on a ball mill. Grinding was continued at 30 Hz for 100 minutes. After

the milling period, the jar was opened and the mixture was rinsed into a conical flask using EtOAc (~40 mL). The mixture was filtered and concentrated under reduced pressure. The crude product was purified by column chromatography using petroleum as eluent to afford pure products. The yield of coupled product was determined to be 51% by column chromatography, while biphenyl was not detected by GC-MS.

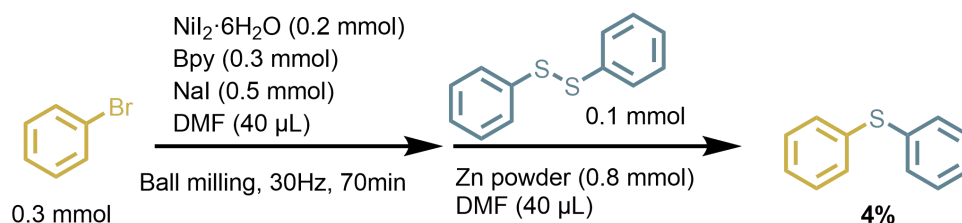

To a 25 mL stainless steel jar was added a 14 mm stainless steel milling ball. Bromobenzene (0.3 mmol),  $\text{NiI}_2 \cdot 6\text{H}_2\text{O}$  (0.2 mmol, 20 mol%), 2,2'-bipyridine (0.3 mmol; 30 mol%), NaI (0.5 mmol) and DMF (40  $\mu\text{L}$ ) were added to the tank and allowed to react for 70 min. When the reaction is complete, quickly add phenyl disulfide (0.1 mmol, 218 mg), zinc powder (0.8 mmol, 8 equiv.) and DMF (40  $\mu\text{L}$ ), and place on a ball mill. Grinding was continued at 30 Hz for 100 minutes. After the milling period, the jar was opened and the mixture was rinsed into a conical flask using EtOAc (~40 mL). The mixture was filtered and concentrated under reduced pressure. The crude product was purified by column chromatography using petroleum as eluent to afford pure products. The yield of coupled product was determined to be 4% by column chromatography.

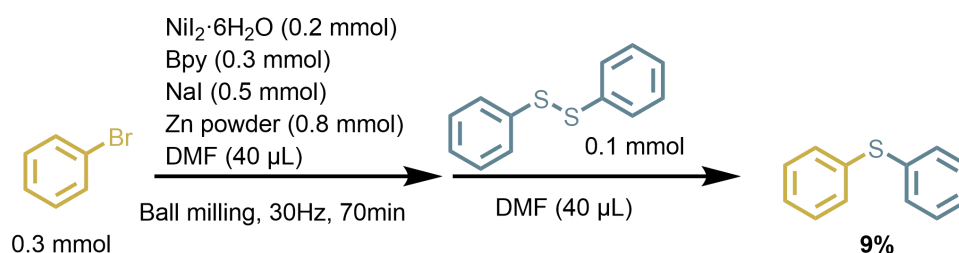

To a 25 mL stainless steel jar was added a 14 mm stainless steel milling ball. Bromobenzene (0.3 mmol),  $\text{NiI}_2 \cdot 6\text{H}_2\text{O}$  (0.2 mmol, 20 mol%), 2,2'-bipyridine (0.3 mmol; 30 mol%), NaI (0.5 mmol), zinc powder (0.8 mmol, 8 equiv.) and DMF (40  $\mu\text{L}$ ) were added to the tank and allowed to react for 70 min. When the reaction is complete, quickly add phenyl disulfide (0.1 mmol, 218 mg), and DMF (40  $\mu\text{L}$ ), and place on a ball mill. Grinding was continued at 30 Hz for 100 minutes. After the milling period, the jar was opened and the mixture was rinsed into a conical flask using EtOAc (~40 mL). The mixture was filtered and concentrated under reduced pressure. The crude product was purified by column chromatography using petroleum as eluent to afford pure products. The yield of coupled product was determined to be 9% by column chromatography.

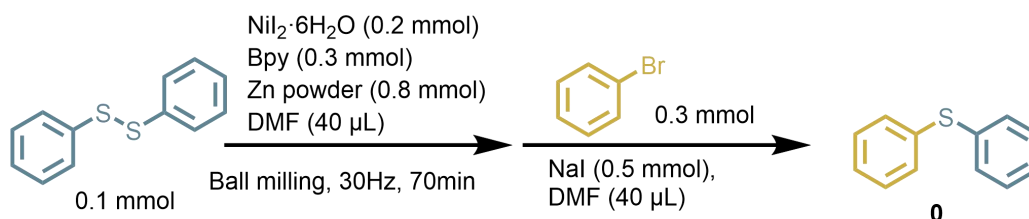

To a 25 mL stainless steel jar was added a 14 mm stainless steel milling ball. Phenyl disulfide (0.1 mmol, 218 mg), NiI<sub>2</sub>·6H<sub>2</sub>O (0.2 mmol, 20 mol%), 2,2'-bipyridine (0.3 mmol; 30 mol%), zinc powder (0.8 mmol, 8 equiv.) and DMF (40 μL) were added to the tank and allowed to react for 70 min. When the reaction is complete, quickly add bromobenzene (0.3 mmol), NaI (0.5 mmol) and DMF (40 μL), and place on a ball mill. Grinding was continued at 30 Hz for 100 minutes. At the end of grinding, the jar was opened and rinsed with EtOAc. No product was detected by thin layer chromatography.

### 3. Optimisation studies

**Table S1:** Optimisation of Mechanochemical C-S Coupling

| Entry | [Ni] & ligand ratio                                            | Additive     | Reductant            | LAG                   | Time (min) | Milling Ball                 | Yield (%) | Remarks                          |
|-------|----------------------------------------------------------------|--------------|----------------------|-----------------------|------------|------------------------------|-----------|----------------------------------|
| 1     | CUI & Bpy (1:2)                                                | NaI (3 mmol) | Zn Powder (3.5mmol)  | DMF (0.24 $\mu$ L/mg) | 100        | $\varnothing$ 14 mm (1 ball) | -         | Selected Catalyst & Ligand Ratio |
| 2     | CoCl <sub>2</sub> 6H <sub>2</sub> O & Bpy (1:2)                | NaI (3 mmol) | Zn Powder (3.5mmol)  | DMF (0.24 $\mu$ L/mg) | 100        | $\varnothing$ 14 mm (1 ball) | 37        |                                  |
| 3     | NiI <sub>2</sub> 6H <sub>2</sub> O & 2,9-dm-1,10-phen (1:2)    | NaI (3 mmol) | Zn Powder (3.5mmol)  | DMF (0.24 $\mu$ L/mg) | 100        | $\varnothing$ 14 mm (1 ball) | -         |                                  |
| 4     | NiI <sub>2</sub> 6H <sub>2</sub> O & 2,9-dm-4,7-dpphen (1:2)   | NaI (3 mmol) | Zn Powder (3.5mmol)  | DMF (0.24 $\mu$ L/mg) | 100        | $\varnothing$ 14 mm (1 ball) | -         |                                  |
| 5     | NiI <sub>2</sub> 6H <sub>2</sub> O & Bpy (1:1)                 | NaI (3 mmol) | Zn Powder (3.5mmol)  | DMF (0.24 $\mu$ L/mg) | 100        | $\varnothing$ 14 mm (1 ball) | 66        |                                  |
| 6     | NiI <sub>2</sub> 6H <sub>2</sub> O & Bpy (1:1.5)               | NaI (3 mmol) | Zn Powder (3.5 mmol) | DMF (0.24 $\mu$ L/mg) | 100        | $\varnothing$ 14 mm (1 ball) | 79        |                                  |
| 7     | NiI <sub>2</sub> 6H <sub>2</sub> O & Bpy (1:2)                 | NaI (3 mmol) | Zn Powder (3.5 mmol) | DMF (0.24 $\mu$ L/mg) | 100        | $\varnothing$ 14 mm (1 ball) | 77        |                                  |
| 8     | NiI <sub>2</sub> 6H <sub>2</sub> O & Bpy (1:1.5, 0.05 mmol Ni) | NaI (3 mmol) | Zn Powder (3.5 mmol) | DMF (0.24 $\mu$ L/mg) | 100        | $\varnothing$ 14 mm (1 ball) | 70        |                                  |
| 9     | NiI <sub>2</sub> 6H <sub>2</sub> O & Bpy (1:1.5)               | NaI (2 mmol) | Zn Powder (3.5 mmol) | DMF (0.24 $\mu$ L/mg) | 100        | $\varnothing$ 14 mm (1 ball) | 73        | Selected Amount of NaI           |

|    |                                                  |                |                      |                   |     |                  |    |             |
|----|--------------------------------------------------|----------------|----------------------|-------------------|-----|------------------|----|-------------|
| 10 | NiI <sub>2</sub> 6H <sub>2</sub> O & Bpy (1:1.5) | NaI (2.5 mmol) | Zn Powder (3.5 mmol) | DMF (0.24 μL/mg)  | 100 | Ø 14 mm (1 ball) | 81 | Selected Zn |
| 11 | NiI <sub>2</sub> 6H <sub>2</sub> O & Bpy (1:1.5) | NaI (3 mmol)   | Zn Powder (3.5 mmol) | DMF (0.24 μL/mg)  | 100 | Ø 14 mm (1 ball) | 79 |             |
| 12 | NiI <sub>2</sub> 6H <sub>2</sub> O & Bpy (1:1.5) | NaI (2.5 mmol) | Zn Powder (3 mmol)   | DMF (0.24 μL/mg)  | 100 | Ø 14 mm (1 ball) | 77 |             |
| 13 | NiI <sub>2</sub> 6H <sub>2</sub> O & Bpy (1:1.5) | NaI (2.5 mmol) | Zn Powder (3.5 mmol) | DMF (0.24 μL/mg)  | 100 | Ø 14 mm (1 ball) | 81 |             |
| 14 | NiI <sub>2</sub> 6H <sub>2</sub> O & Bpy (1:1.5) | NaI (2.5 mmol) | Zn Powder (4 mmol)   | DMF (0.24 μL/mg)  | 100 | Ø 14 mm (1 ball) | 85 |             |
| 15 | NiI <sub>2</sub> 6H <sub>2</sub> O & Bpy (1:1.5) | NaI (2.5 mmol) | Zn Powder (4.5 mmol) | DMF (0.24 μL/mg)  | 100 | Ø 14 mm (1 ball) | 52 |             |
| 16 | NiI <sub>2</sub> 6H <sub>2</sub> O & Bpy (1:1.5) | NaI (2.5 mmol) | Zn Granular (4 mmol) | DMF (0.24 μL/mg)  | 100 | Ø 14 mm (1 ball) | 17 |             |
| 17 | NiI <sub>2</sub> 6H <sub>2</sub> O & Bpy (1:1.5) | NaI (2.5 mmol) | Zn flake (4 mmol)    | DMF (0.24 μL/mg)  | 100 | Ø 14 mm (1 ball) | 29 |             |
| 18 | NiI <sub>2</sub> 6H <sub>2</sub> O & Bpy (1:1.5) | NaI (2.5 mmol) | -                    | DMF (0.24 μL/mg)  | 100 | Ø 14 mm (1 ball) | -  |             |
| 19 | NiI <sub>2</sub> 6H <sub>2</sub> O & Bpy (1:1.5) | NaI (2.5 mmol) | Zn Powder (4 mmol)   | DMF (0.19 μL/mg)  | 100 | Ø 14 mm (1 ball) | 86 |             |
| 20 | NiI <sub>2</sub> 6H <sub>2</sub> O & Bpy (1:1.5) | NaI (2.5 mmol) | Zn Powder (4 mmol)   | DMF (0.14 μL/mg)  | 100 | Ø 14 mm (1 ball) | 62 |             |
| 21 | NiI <sub>2</sub> 6H <sub>2</sub> O & Bpy (1:1.5) | NaI (2.5 mmol) | Zn Powder (4 mmol)   | DMA (0.19 μL/mg)  | 100 | Ø 14 mm (1 ball) | 70 |             |
| 22 | NiI <sub>2</sub> 6H <sub>2</sub> O & Bpy (1:1.5) | NaI (2.5 mmol) | Zn Powder (4 mmol)   | DMSO (0.19 μL/mg) | 100 | Ø 14 mm (1 ball) | 35 |             |



|    |                                                  |                |                    |                                |     |                  |    |                       |
|----|--------------------------------------------------|----------------|--------------------|--------------------------------|-----|------------------|----|-----------------------|
| 23 | NiI <sub>2</sub> 6H <sub>2</sub> O & Bpy (1:1.5) | NaI (2.5 mmol) | Zn Powder (4 mmol) | CH <sub>3</sub> OH (0.19μL/mg) | 100 | Ø 14 mm (1 ball) | 59 |                       |
| 24 | NiI <sub>2</sub> 6H <sub>2</sub> O & Bpy (1:1.5) | NaI (2.5 mmol) | Zn Powder (4 mmol) | H <sub>2</sub> O (0.19μL/mg)   | 100 | Ø 14 mm (1 ball) | 5  |                       |
| 25 | NiI <sub>2</sub> 6H <sub>2</sub> O & Bpy (1:1.5) | NaI (2.5 mmol) | Zn Powder (4 mmol) | CH <sub>3</sub> CN (0.19μL/mg) | 100 | Ø 14 mm (1 ball) | 42 |                       |
| 26 | NiI <sub>2</sub> 6H <sub>2</sub> O & Bpy (1:1.5) | NaI (2.5 mmol) | Zn Powder (4 mmol) | -                              | 100 | Ø 14 mm (1 ball) | -  |                       |
| 27 | NiI <sub>2</sub> 6H <sub>2</sub> O & Bpy (1:1.5) | NaI (2.5 mmol) | Zn Powder (4 mmol) | DMF (0.19 μL/mg)               | 70  | Ø 14 mm (1 ball) | 76 | Reaction Time         |
| 28 | NiI <sub>2</sub> 6H <sub>2</sub> O & Bpy (1:1.5) | NaI (2.5 mmol) | Zn Powder (4 mmol) | DMF (0.19 μL/mg)               | 120 | Ø 14 mm (1 ball) | 69 |                       |
| 29 | NiI <sub>2</sub> 6H <sub>2</sub> O & Bpy (1:1.5) | NaI (2.5 mmol) | Zn Powder (4 mmol) | DMF (0.19 μL/mg)               | 100 | Ø 14 mm (1 ball) | 86 |                       |
| 30 | NiI <sub>2</sub> 6H <sub>2</sub> O & Bpy (1:1.5) | NaI (2.5 mmol) | Zn Powder (4 mmol) | DMF (0.19 μL/mg)               | 100 | Ø 12 mm (1 ball) | 75 | Selected Milling Ball |
| 31 | NiI <sub>2</sub> 6H <sub>2</sub> O & Bpy (1:1.5) | NaI (2.5 mmol) | Zn Powder (4 mmol) | DMF (0.19 μL/mg)               | 100 | Ø 15 mm (1 ball) | 47 |                       |
| 32 | NiI <sub>2</sub> 6H <sub>2</sub> O & Bpy (1:1.5) | NaI (2.5 mmol) | Zn Powder (4 mmol) | DMF (0.19 μL/mg)               | 100 | Ø 14 mm (1 ball) | 86 |                       |

## 4. Characterisation Data

### Diphenylsulfane (**3a**)<sup>[1]</sup>

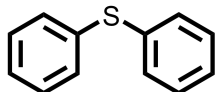

Prepared according to general procedure. Purified by column chromatography (PE) to give diphenylsulfane in the form of a colorless oil. <sup>1</sup>H NMR (300 MHz, CDCl<sub>3</sub>) δ 7.32 (t, *J* = 6.5 Hz, 5H), 7.28 (d, *J* = 1.8 Hz, 3H), 7.21 (d, *J* = 3.5 Hz, 2H). <sup>13</sup>C NMR (75 MHz, CDCl<sub>3</sub>) δ 135.69, 130.96, 129.13, 126.98. GCMS-EI (m/z): [M]<sup>+</sup> calcd for C<sub>12</sub>H<sub>10</sub>S, 186; found, 186.

### phenyl(p-tolyl)sulfane (**3b**)<sup>[1]</sup>

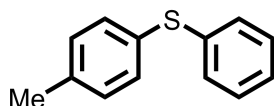

Prepared according to general procedure. Purified by column chromatography (PE) to give phenyl(p-tolyl)sulfane in the form of a yellow oil. <sup>1</sup>H NMR (300 MHz, DMSO) δ 7.43 – 7.32 (m, 2H), 7.28 (dd, *J* = 14.0, 5.8 Hz, 4H), 7.23 (s, 1H), 7.21 (d, *J* = 4.7 Hz, 2H), 2.31 (s, 3H). <sup>13</sup>C NMR (75 MHz, DMSO) δ 137.66, 136.24, 132.08, 130.38, 130.33, 129.51, 129.45, 126.78, 20.71. GCMS-EI (m/z): [M]<sup>+</sup> calcd for C<sub>13</sub>H<sub>12</sub>S, 200; found, 200.

### (4-ethoxyphenyl)(phenyl)sulfane (**3c**)<sup>[2]</sup>

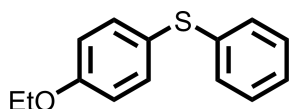

Prepared according to general procedure. Purified by column chromatography (PE) to give (4-ethoxyphenyl)(phenyl)sulfane in the form of a yellow oil. <sup>1</sup>H NMR (300 MHz, CDCl<sub>3</sub>) δ 7.44 – 7.36 (m, 2H), 7.26 – 7.19 (m, 2H), 7.13 (dd, *J* = 14.5, 7.2 Hz, 3H), 6.91 – 6.84 (m, 2H), 4.03 (q, *J* = 7.0 Hz, 2H), 1.42 (t, *J* = 7.0 Hz, 3H). <sup>13</sup>C NMR (75 MHz, CDCl<sub>3</sub>) δ 159.13, 138.60, 135.30, 128.79, 128.02, 125.59, 123.90, 63.48, 14.69. GCMS-EI (m/z): [M]<sup>+</sup> calcd for C<sub>14</sub>H<sub>14</sub>OS, 230; found, 230.

### (4-fluorophenyl)(phenyl)sulfane (**3d**)<sup>[1]</sup>

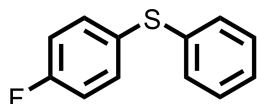

Prepared according to general procedure. Purified by column chromatography (PE) to give (4-fluorophenyl)(phenyl)sulfane in the form of a colourless oil. <sup>1</sup>H NMR (300 MHz, CDCl<sub>3</sub>) δ 7.42 – 7.35 (m, 2H), 7.31 – 7.18 (m, 5H), 7.08 – 6.98 (m, 2H). <sup>13</sup>C NMR (75 MHz, CDCl<sub>3</sub>) δ 162.6 (d, *J* = 246.8 Hz), 136.60, 134.04 (d, *J* = 8.2 Hz), 130.2 (d, *J* = 3 Hz), 129.90, 129.13, 126.71, 116.4 (d, *J* = 22.0 Hz). <sup>19</sup>F NMR (377 MHz, CDCl<sub>3</sub>) δ -114.06. GCMS-EI (m/z): [M]<sup>+</sup> calcd for C<sub>12</sub>H<sub>9</sub>FS, 204; found, 204.

phenyl(4-(trifluoromethyl)phenyl)sulfane (**3e**)<sup>[1]</sup>

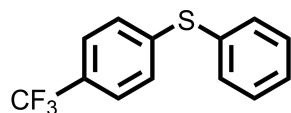

Prepared according to general procedure. Purified by column chromatography (PE) to give phenyl(4-(trifluoromethyl)phenyl)sulfane in the form of a colourless oil. <sup>1</sup>H NMR (400 MHz, DMSO) δ 7.67 (d, *J* = 8.3 Hz, 2H), 7.56 – 7.43 (m, 5H), 7.34 (d, *J* = 8.1 Hz, 2H). <sup>13</sup>C NMR (101 MHz, DMSO) δ 143.18, 133.91, 131.78, 130.50, 129.53, 128.58, 127.3 (q, *J* = 32.3 Hz), 126.5 (q, *J* = 4.0 Hz), 124.2 (q, *J* = 272.7 Hz). <sup>19</sup>F NMR (377 MHz, DMSO) δ -60.94. GCMS-EI (*m/z*): [*M*]<sup>+</sup> calcd for C<sub>13</sub>H<sub>9</sub>F<sub>3</sub>S, 254; found, 254.

4-(phenylthio)benzotrile (**3f**)<sup>[3]</sup>

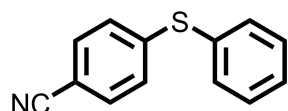

Prepared according to general procedure. Purified by column chromatography (PE) to give 4-(phenylthio)benzotrile in the form of a yellow oil. <sup>1</sup>H NMR (300 MHz, CDCl<sub>3</sub>) δ 7.55 – 7.49 (m, 2H), 7.49 – 7.45 (m, 2H), 7.45 – 7.40 (m, 3H), 7.19 – 7.13 (m, 2H). <sup>13</sup>C NMR (75 MHz, CDCl<sub>3</sub>) δ 145.65, 134.42, 132.29, 130.76, 129.85, 129.32, 127.24, 118.72, 108.63. GCMS-EI (*m/z*): [*M*]<sup>+</sup> calcd for C<sub>13</sub>H<sub>9</sub>NS, 211; found, 211.

4-(phenylthio)benzaldehyde (**3g**)<sup>[4]</sup>

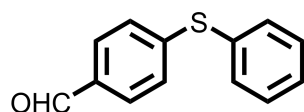

Prepared according to general procedure. Purified by column chromatography (PE) to give 4-(phenylthio)benzaldehyde in the form of a yellow oil. <sup>1</sup>H NMR (300 MHz, CDCl<sub>3</sub>) δ 9.91 (s, 1H), 7.75 – 7.68 (m, 2H), 7.56 – 7.49 (m, 2H), 7.46 – 7.40 (m, 3H), 7.24 (dd, *J* = 8.2, 1.4 Hz, 3H). <sup>13</sup>C NMR (75 MHz, CDCl<sub>3</sub>) δ 191.11, 147.18, 134.31, 133.68, 131.27, 130.08, 129.76, 129.12, 127.19. GCMS-EI (*m/z*): [*M*]<sup>+</sup> calcd for C<sub>13</sub>H<sub>10</sub>OS, 214; found, 214.

(4-(dimethoxymethyl)phenyl)(phenyl)sulfane (**3h**)

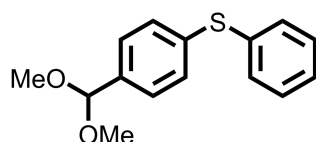

Prepared according to general procedure. Purified by column chromatography (PE/EA = 100/1) to give (4-(dimethoxymethyl)phenyl)(phenyl)sulfane in the form of a yellow oil. <sup>1</sup>H NMR (400 MHz, DMSO) δ 7.40 (d, *J* = 8.6 Hz, 2H), 7.38 – 7.35 (m, 3H), 7.35 – 7.29 (m, 4H), 5.37 (s, 1H), 3.24 (s, 6H). <sup>13</sup>C NMR (101 MHz, DMSO) δ 137.85, 135.63, 134.89, 134.36, 131.47, 130.57, 130.08, 128.17, 128.07, 102.69, 53.08. GCMS-EI (*m/z*): [*M*]<sup>+</sup> calcd for C<sub>15</sub>H<sub>16</sub>O<sub>2</sub>S, 260; found, 260.

1-(4-(phenylthio)phenyl)ethan-1-one (**3i**)<sup>[3]</sup>

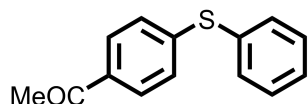

Prepared according to general procedure. Purified by column chromatography (PE) to give 1-(4-(phenylthio)phenyl)ethan-1-one in the form of a White solid.  $^1\text{H}$  NMR (300 MHz,  $\text{CDCl}_3$ )  $\delta$  7.82 (d,  $J = 8.3$  Hz, 2H), 7.50 (dd,  $J = 6.6, 3.0$  Hz, 2H), 7.44 – 7.37 (m, 3H), 7.21 (d,  $J = 8.3$  Hz, 2H), 2.55 (d,  $J = 0.7$  Hz, 3H).  $^{13}\text{C}$  NMR (75 MHz,  $\text{CDCl}_3$ )  $\delta$  197.01, 144.83, 134.29, 133.78, 131.88, 129.59, 128.79, 128.71, 127.28, 26.41. GCMS-EI (m/z):  $[\text{M}]^+$  calcd for  $\text{C}_{14}\text{H}_{12}\text{OS}$ , 228; found, 228.

#### methyl 4-(phenylthio)benzoate (**3j**)<sup>[4]</sup>

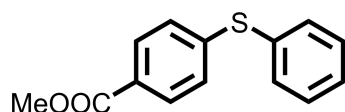

Prepared according to general procedure. Purified by column chromatography (PE/EA = 50/1) to give methyl 4-(phenylthio)benzoate in the form of a White solid.  $^1\text{H}$  NMR (300 MHz,  $\text{CDCl}_3$ )  $\delta$  7.94 – 7.84 (m, 2H), 7.52 – 7.45 (m, 2H), 7.42 – 7.34 (m, 3H), 7.23 – 7.16 (m, 2H), 3.88 (s, 3H).  $^{13}\text{C}$  NMR (75 MHz,  $\text{CDCl}_3$ )  $\delta$  166.52, 144.27, 133.57, 132.28, 129.99, 129.53, 128.54, 127.46, 127.38, 51.96. GCMS-EI (m/z):  $[\text{M}]^+$  calcd for  $\text{C}_{14}\text{H}_{12}\text{O}_2\text{S}$ , 244; found, 244.

#### 4-(phenylthio)phenol (**3k**)<sup>[11]</sup>

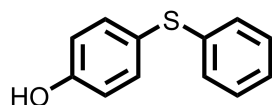

Prepared according to general procedure. Purified by column chromatography (PE/EA = 50/1) to give 4-(phenylthio)phenol in the form of a yellow oil.  $^1\text{H}$  NMR (300 MHz, DMSO)  $\delta$  7.37 – 7.30 (m, 2H), 7.26 (d,  $J = 8.1$  Hz, 2H), 7.18 – 7.04 (m, 3H), 6.88 – 6.80 (m, 2H).  $^{13}\text{C}$  NMR (75 MHz, DMSO)  $\delta$  158.39, 138.72, 136.07, 129.19, 127.14, 125.67, 120.44, 116.85. GCMS-EI (m/z):  $[\text{M}]^+$  calcd for  $\text{C}_{12}\text{H}_{10}\text{OS}$ , 202; found, 202.

#### 4-(phenylthio)benzoic acid (**3l**)<sup>[7]</sup>

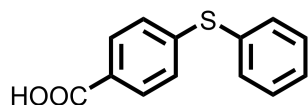

Prepared according to general procedure. Purified by column chromatography (PE/EA = 50/1) to give 4-(phenylthio)benzoic acid in the form of a White solid.  $^1\text{H}$  NMR (300 MHz, DMSO)  $\delta$  7.90 – 7.81 (m, 3H), 7.75 – 7.67 (m, 2H), 7.48 (dt,  $J = 5.4, 3.4$  Hz, 3H), 7.27 – 7.23 (m, 1H).  $^{13}\text{C}$  NMR (75 MHz, DMSO)  $\delta$  166.68, 142.88, 133.35, 131.77, 131.36, 130.26, 130.07, 129.00, 128.51, 127.66, 126.97. HRMS(EI) m/z:  $[\text{M}-\text{H}]^-$  Calcd for  $\text{C}_{13}\text{H}_{10}\text{O}_2\text{S}$ , 230; found, 229.0327.

#### 4-(phenylthio)aniline (**3m**)<sup>[3]</sup>

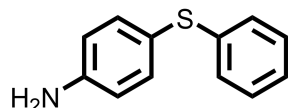

Prepared according to general procedure. Purified by column chromatography (PE/EA = 20/1) to give 4-(phenylthio)aniline in the form of a yellow solid.  $^1\text{H}$  NMR (300 MHz,  $\text{CDCl}_3$ )  $\delta$  7.33 – 7.27 (m, 2H), 7.25 – 7.16 (m, 2H), 7.15 – 7.05 (m, 3H), 6.70 – 6.63 (m, 2H), 3.74 (br. s, 2H).  $^{13}\text{C}$  NMR (75 MHz,  $\text{CDCl}_3$ )  $\delta$  146.86, 139.59, 136.02, 128.75, 127.25, 125.20, 120.50, 115.86. GCMS-EI (m/z):  $[\text{M}]^+$  calcd for  $\text{C}_{12}\text{H}_{11}\text{NS}$ , 201; found, 201.

4,4,5,5-tetramethyl-2-(4-(phenylthio)phenyl)-1,3,2-dioxaborolane (**3n**)<sup>[3]</sup>

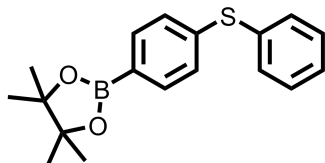

Prepared according to general procedure. Purified by column chromatography (PE/EA = 100/1) to give 4,4,5,5-tetramethyl-2-(4-(phenylthio)phenyl)-1,3,2-dioxaborolane in the form of a yellow oil.  $^1\text{H}$  NMR (400 MHz, DMSO)  $\delta$  7.61 (dd,  $J = 11.6, 4.9$  Hz, 3H), 7.46 – 7.35 (m, 4H), 7.24 (d,  $J = 8.2$  Hz, 2H), 1.29 (d,  $J = 4.4$  Hz, 12H).  $^{13}\text{C}$  NMR (101 MHz, DMSO)  $\delta$  140.39, 136.82, 135.78, 133.57, 132.58, 131.44, 130.23, 128.87, 128.66, 126.01, 84.41, 84.21, 25.12. GCMS-EI (m/z):  $[\text{M}]^+$  calcd for  $\text{C}_{10}\text{H}_{12}\text{O}_2\text{S}$ , 196; found, 196.

phenyl(m-tolyl)sulfane (**3o**)<sup>[1]</sup>

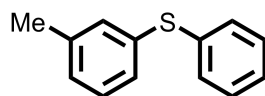

Prepared according to general procedure. Purified by column chromatography (PE) to give phenyl(m-tolyl)sulfane in the form of a yellow oil.  $^1\text{H}$  NMR (300 MHz,  $\text{CDCl}_3$ )  $\delta$  7.36 – 7.31 (m, 2H), 7.31 – 7.26 (m, 2H), 7.25 – 7.18 (m, 3H), 7.16 (d,  $J = 4.7$  Hz, 1H), 7.06 (d,  $J = 7.8$  Hz, 1H), 2.31 (s, 3H).  $^{13}\text{C}$  NMR (75 MHz,  $\text{CDCl}_3$ )  $\delta$  139.01, 136.06, 135.18, 131.80, 130.70, 129.08, 128.99, 128.29, 127.98, 126.80, 21.26. GCMS-EI (m/z):  $[\text{M}]^+$  calcd for  $\text{C}_{13}\text{H}_{12}\text{S}$ , 200; found, 200.

phenyl(o-tolyl)sulfane (**3p**)<sup>[1]</sup>

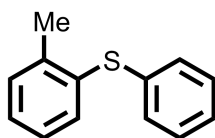

Prepared according to general procedure. Purified by column chromatography (PE) to give phenyl(o-tolyl)sulfane in the form of a yellow oil.  $^1\text{H}$  NMR (300 MHz,  $\text{CDCl}_3$ )  $\delta$  7.50 (dd,  $J = 7.3, 1.6$  Hz, 1H), 7.34 – 7.27 (m, 2H), 7.25 (t,  $J = 3.3$  Hz, 3H), 7.21 (d,  $J = 0.6$  Hz, 2H), 7.18 – 7.10 (m, 1H), 2.38 (s, 3H).  $^{13}\text{C}$  NMR (75 MHz,  $\text{CDCl}_3$ )  $\delta$  139.95, 136.12, 132.97, 130.56, 129.60, 129.09, 129.03, 127.87, 127.48, 127.12, 126.68, 126.30, 20.52. GCMS-EI (m/z):  $[\text{M}]^+$  calcd for  $\text{C}_{13}\text{H}_{12}\text{S}$ , 200; found, 200.

(3,4-dimethylphenyl)(phenyl)sulfane (**3q**)<sup>[7]</sup>

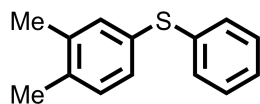

Prepared according to general procedure. Purified by column chromatography (PE) to give (3,4-dimethylphenyl)(phenyl)sulfane in the form of a yellow oil.  $^1\text{H}$  NMR (300 MHz,  $\text{CDCl}_3$ )  $\delta$  7.31 (d,  $J = 7.0$  Hz, 1H), 7.25 (d,  $J = 4.4$  Hz, 3H), 7.23 – 7.13 (m, 3H), 7.09 (d,  $J = 7.9$  Hz, 1H), 2.25 (s, 3H), 2.23 (s, 3H).  $^{13}\text{C}$  NMR (75 MHz,  $\text{CDCl}_3$ )  $\delta$  137.72, 137.32, 136.37, 133.52, 130.51, 129.93, 129.55, 129.03, 128.95, 127.49, 127.12, 126.21 (s), 19.66, 19.43. GCMS-EI (m/z):  $[\text{M}]^+$  calcd for  $\text{C}_{14}\text{H}_{14}\text{S}$ , 200; found, 214.

### 3-(phenylthio)thiophene (**3r**)<sup>[9]</sup>

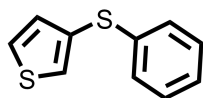

Prepared according to general procedure. Purified by column chromatography (PE) to give 3-(phenylthio)thiophene in the form of a yellow oil.  $^1\text{H}$  NMR (300 MHz,  $\text{CDCl}_3$ )  $\delta$  7.41 – 7.35 (m, 2H), 7.31 – 7.22 (m, 4H), 7.19 (dd,  $J = 10.7, 3.9$  Hz, 1H), 7.06 (dd,  $J = 4.5, 1.3$  Hz, 1H).  $^{13}\text{C}$  NMR (75 MHz,  $\text{CDCl}_3$ )  $\delta$  137.28, 131.17, 129.28, 128.94, 128.36, 128.13, 126.68, 126.07. GCMS-EI (m/z):  $[\text{M}]^+$  calcd for  $\text{C}_{10}\text{H}_8\text{S}_2$ , 192; found, 192.

### 3-(phenylthio)pyridine (**3s**)<sup>[1]</sup>

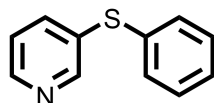

Prepared according to general procedure. Purified by column chromatography (PE) to give 3-(phenylthio)pyridine in the form of a yellow oil.  $^1\text{H}$  NMR (300 MHz,  $\text{CDCl}_3$ )  $\delta$  8.42 (d,  $J = 5.8$  Hz, 1H), 7.65 – 7.55 (m, 2H), 7.48 – 7.35 (m, 4H), 6.99 (ddd,  $J = 7.5, 4.9, 1.0$  Hz, 1H), 6.88 (dd,  $J = 8.1, 0.9$  Hz, 1H).  $^{13}\text{C}$  NMR (75 MHz,  $\text{CDCl}_3$ )  $\delta$  161.46, 149.45, 136.68, 134.89, 130.95, 129.57, 129.04, 121.30, 119.82. HRMS(EI) m/z:  $[\text{M}+\text{H}]^+$  Calcd for  $\text{C}_{11}\text{H}_9\text{NS}$ , 187; found, 188.0522.

### ethyl 2-(phenylthio)acetate (**3t**)<sup>[12]</sup>

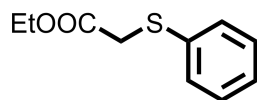

Prepared according to general procedure. Purified by column chromatography (PE/EA = 100/1) to give ethyl 2-(phenylthio)acetate in the form of a yellow oil.  $^1\text{H}$  NMR (400 MHz, DMSO)  $\delta$  7.38 – 7.29 (m, 4H), 7.25 – 7.18 (m, 1H), 4.08 (q,  $J = 7.1$  Hz, 2H), 3.86 (s, 2H), 1.13 (t,  $J = 7.1$  Hz, 3H).  $^{13}\text{C}$  NMR (101 MHz, DMSO)  $\delta$  169.71, 135.57, 129.51, 128.90, 126.77, 61.36, 35.37, 14.42. GCMS-EI (m/z):  $[\text{M}]^+$  calcd for  $\text{C}_{10}\text{H}_{12}\text{O}_2\text{S}$ , 196; found, 196.

### butyl(phenyl)sulfane (**3u**)<sup>[13]</sup>

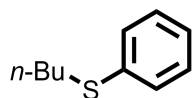

Prepared according to general procedure. Purified by column chromatography (PE) to give butyl(phenyl)sulfane in the form of a yellow oil.  $^1\text{H}$  NMR (300 MHz, DMSO)  $\delta$  7.56 – 7.36 (m, 1H), 7.31 (d,  $J = 4.4$  Hz, 4H), 7.22 – 7.12 (m, 1H), 2.99 – 2.90 (m, 2H), 1.60 – 1.33 (m, 4H), 0.88 (t,  $J = 7.3$  Hz, 3H).  $^{13}\text{C}$  NMR (75 MHz, DMSO)  $\delta$  136.58, 129.04, 127.95, 125.48, 31.70, 30.72, 21.34, 13.54. GCMS-EI (m/z):  $[\text{M}]^+$  calcd for  $\text{C}_{10}\text{H}_{14}\text{S}$ , 166; found, 166.

phenyl(p-tolyl)sulfane (**4b**)<sup>[3]</sup>

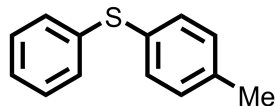

Prepared according to general procedure. Purified by column chromatography (PE) to give phenyl(p-tolyl)sulfane in the form of a colourless oil.  $^1\text{H}$  NMR (400 MHz, DMSO)  $\delta$  7.36 – 7.31 (m, 2H), 7.30 – 7.26 (m, 2H), 7.23 (dd,  $J = 12.1, 5.0$  Hz, 5H), 2.31 (s, 3H).  $^{13}\text{C}$  NMR (101 MHz, DMSO)  $\delta$  138.08, 136.66, 132.49, 130.83, 130.76, 129.90, 129.86, 127.22, 21.12. GCMS-EI (m/z):  $[\text{M}]^+$  calcd for  $\text{C}_{13}\text{H}_{12}\text{S}$ , 200; found, 200.

(4-chlorophenyl)(phenyl)sulfane (**4c**)<sup>[5]</sup>

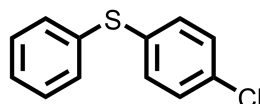

Prepared according to general procedure. Purified by column chromatography (PE) to give (4-chlorophenyl)(phenyl)sulfane in the form of a yellow oil.  $^1\text{H}$  NMR (400 MHz, DMSO)  $\delta$  7.51 – 7.42 (m, 2H), 7.41 – 7.33 (m, 5H), 7.32 – 7.28 (m, 2H).  $^{13}\text{C}$  NMR (101 MHz, DMSO)  $\delta$  134.83, 134.39, 132.46, 132.36, 131.78, 130.21, 129.96, 128.38. GCMS-EI (m/z):  $[\text{M}]^+$  calcd for  $\text{C}_{12}\text{H}_9\text{ClS}$ , 220; found, 220.

4-(phenylthio)aniline (**4d**)<sup>[1]</sup>

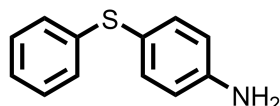

Prepared according to general procedure. Purified by column chromatography (PE/EA = 20/1) to give 4-(phenylthio)aniline in the form of a yellow solid.  $^1\text{H}$  NMR (400 MHz, DMSO)  $\delta$  7.30 – 7.15 (m, 4H), 7.09 (t,  $J = 7.4$  Hz, 1H), 7.03 (d,  $J = 7.3$  Hz, 2H), 6.64 (d,  $J = 8.5$  Hz, 2H), 5.51 (br. s, 2H).  $^{13}\text{C}$  NMR (101 MHz, DMSO)  $\delta$  150.44, 140.63, 136.84, 129.40, 126.48, 125.42, 115.33, 115.21. GCMS-EI (m/z):  $[\text{M}]^+$  calcd for  $\text{C}_{12}\text{H}_{11}\text{NS}$ , 201; found, 201.

4-(phenylthio)phenol (**4e**)<sup>[5]</sup>

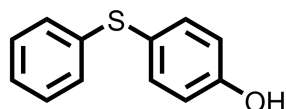

Prepared according to general procedure. Purified by column chromatography (PE/EA = 30/1) to give 4-(phenylthio)phenol in the form of a yellow oil.  $^1\text{H}$  NMR (300 MHz,  $\text{CDCl}_3$ )  $\delta$  7.40 – 7.32 (m, 2H), 7.27 – 7.10 (m, 5H), 6.85 – 6.77 (m, 2H).  $^{13}\text{C}$  NMR (75 MHz,  $\text{CDCl}_3$ )  $\delta$  155.64, 138.17,

135.38, 128.91, 128.89, 128.30, 128.28, 125.86, 125.83, 124.56, 116.45, 116.43. GCMS-EI (m/z): [M]<sup>+</sup> calcd for C<sub>12</sub>H<sub>10</sub>OS, 202; found, 202.

### 2-(phenylthio)aniline (**4f**)<sup>[8]</sup>

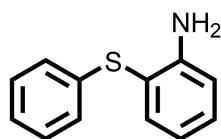

Prepared according to general procedure. Purified by column chromatography (PE/EA = 50/1) to give 2-(phenylthio)aniline in the form of a colourless oil. <sup>1</sup>H NMR (300 MHz, DMSO) δ 7.35 – 7.09 (m, 5H), 7.07 – 7.01 (m, 2H), 6.82 (d, *J* = 8.2 Hz, 1H), 6.60 (t, *J* = 7.4 Hz, 1H), 5.37 (br. s, 2H). <sup>13</sup>C NMR (75 MHz, DMSO) δ 150.33, 130.01, 136.79, 131.10, 129.07, 126.39, 125.41, 116.80, 114.99, 112.02. GCMS-EI (m/z): [M]<sup>+</sup> calcd for C<sub>12</sub>H<sub>11</sub>NS, 201; found, 201.

### 3-(phenylthio)pyridine (**4g**)<sup>[6]</sup>

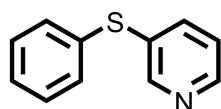

Prepared according to general procedure. Purified by column chromatography (PE) to give 3-(phenylthio)pyridine in the form of a yellow oil. <sup>1</sup>H NMR (400 MHz, DMSO) δ 8.41 (dd, *J* = 4.8, 1.0 Hz, 1H), 7.65 (td, *J* = 8.0, 1.9 Hz, 1H), 7.58 (dd, *J* = 6.4, 3.2 Hz, 2H), 7.52 – 7.44 (m, 3H), 7.15 (ddd, *J* = 7.4, 4.8, 0.9 Hz, 1H), 6.96 (d, *J* = 8.1 Hz, 1H). <sup>13</sup>C NMR (101 MHz, DMSO) δ 160.36, 150.05, 137.87, 135.09, 130.73, 130.31, 129.73, 121.58, 120.98. HRMS(EI) m/z: [M+H]<sup>+</sup> Calcd for C<sub>11</sub>H<sub>9</sub>NS, 187, found, 188.0522.

### 2-(phenylthio)thiophene (**4h**)<sup>[10]</sup>

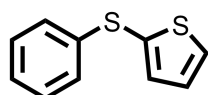

Prepared according to general procedure. Purified by column chromatography (PE) to give 2-(phenylthio)thiophene in the form of a yellow oil. <sup>1</sup>H NMR (400 MHz, DMSO) δ 7.83 (ddd, *J* = 16.5, 5.3, 1.2 Hz, 1H), 7.44 – 7.39 (m, 1H), 7.35 – 7.26 (m, 2H), 7.24 – 7.09 (m, 4H). <sup>13</sup>C NMR (101 MHz, DMSO) δ 138.25, 137.13, 136.56, 134.36, 133.19, 129.80, 129.04, 128.86, 127.33, 126.89. GCMS-EI (m/z): [M]<sup>+</sup> calcd for C<sub>10</sub>H<sub>8</sub>S<sub>2</sub>, 192; found, 192.

### butyl(phenyl)sulfane (**4i**)<sup>[3]</sup>

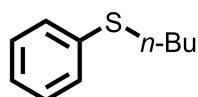

Prepared according to general procedure. Purified by column chromatography (PE) to give butyl(phenyl)sulfane in the form of a yellow oil. <sup>1</sup>H NMR (400 MHz, DMSO) δ 7.31 (d, *J* = 4.2 Hz, 4H), 7.17 (dt, *J* = 8.6, 4.3 Hz, 1H), 3.00 – 2.90 (m, 2H), 1.61 – 1.34 (m, 4H), 0.88 (t, *J* = 7.3 Hz, 3H). <sup>13</sup>C NMR (101 MHz, DMSO) δ 137.01, 129.45, 128.41, 125.91, 32.16, 31.15, 21.75, 13.94. GCMS-EI (m/z): [M]<sup>+</sup> calcd for C<sub>10</sub>H<sub>14</sub>S, 166; found, 166.



cyclohexyl(phenyl)sulfane (**4j**)<sup>[1]</sup>

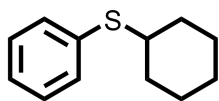

Prepared according to general procedure. Purified by column chromatography (PE) to give cyclohexyl(phenyl)sulfane in the form of a yellow oil. <sup>1</sup>H NMR (400 MHz, DMSO) δ 7.39 – 7.28 (m, 4H), 7.26 – 7.18 (m, 1H), 3.28 – 3.17 (m, 1H), 1.90 (dd, *J* = 9.3, 3.8 Hz, 2H), 1.70 (dd, *J* = 8.6, 4.0 Hz, 2H), 1.60 – 1.52 (m, 1H), 1.33 (ddd, *J* = 25.8, 11.9, 6.0 Hz, 5H). <sup>13</sup>C NMR (101 MHz, DMSO) δ 135.26, 131.13, 129.47, 126.86, 45.48, 33.24, 25.75, 25.74. GCMS-EI (*m/z*): [M]<sup>+</sup> calcd for C<sub>12</sub>H<sub>16</sub>S, 192; found, 192.

## 5. Spectroscopic Data

3a, CDCl<sub>3</sub>, <sup>1</sup>H NMR 300 MHz

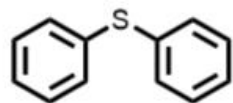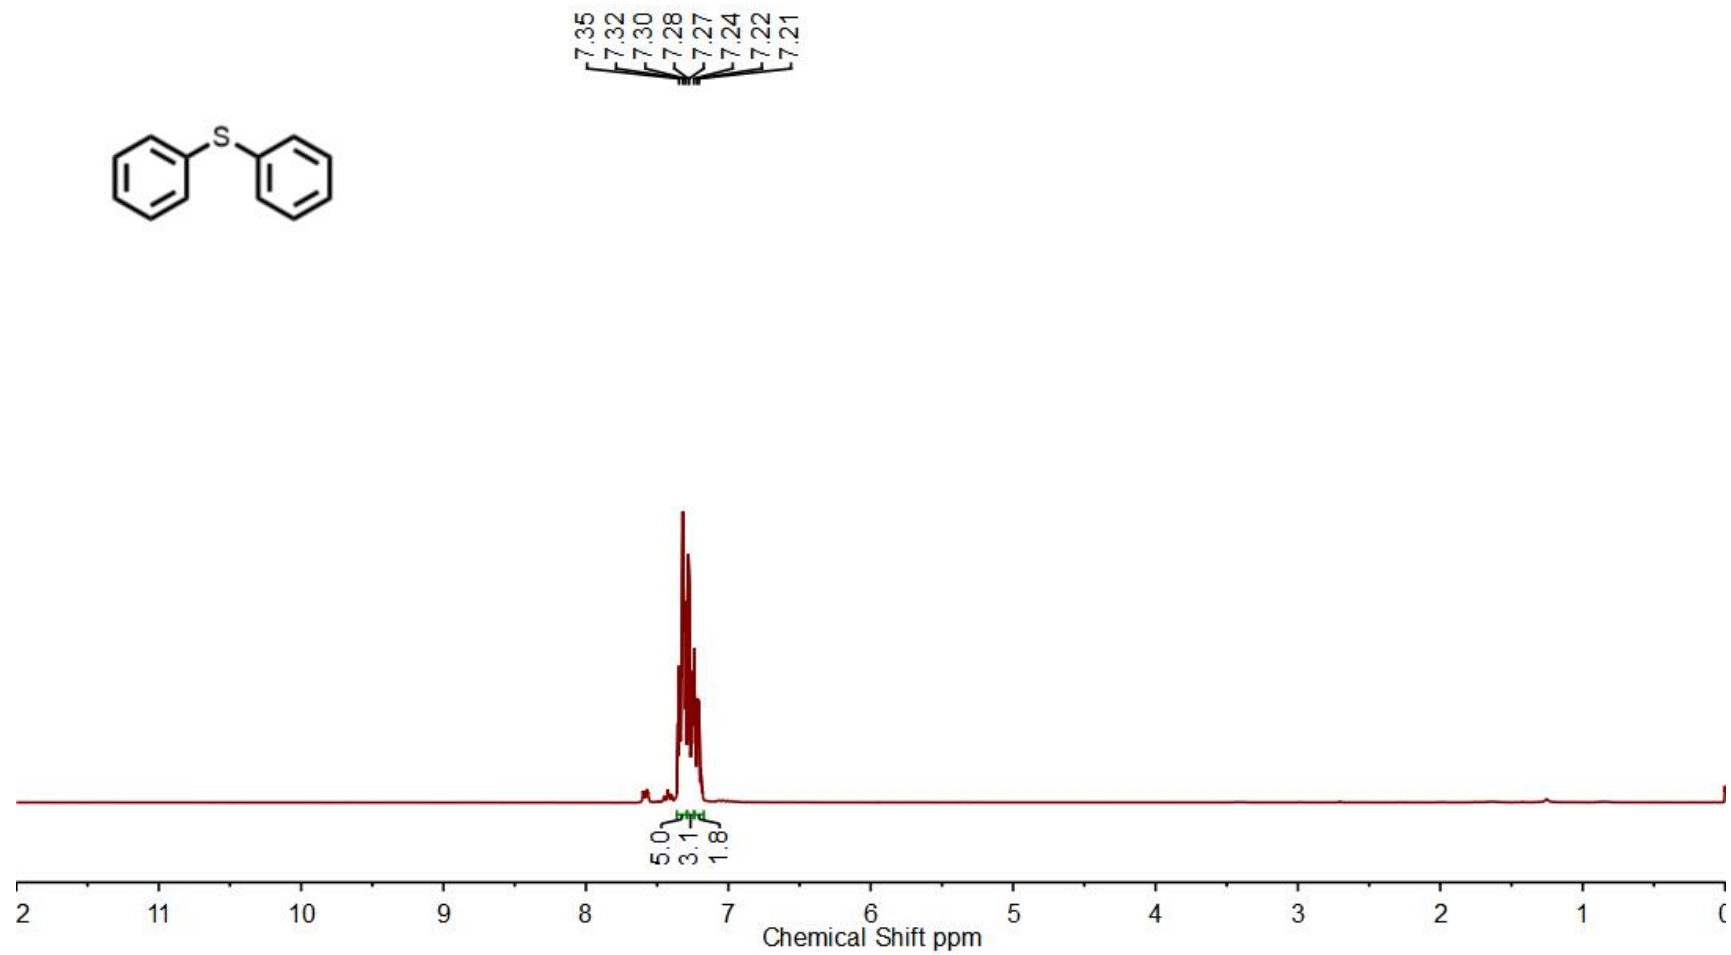

3a, CDCl<sub>3</sub>, <sup>13</sup>C NMR 75 MHz

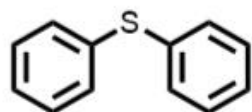

~135.69  
~130.96  
~129.13  
~126.98

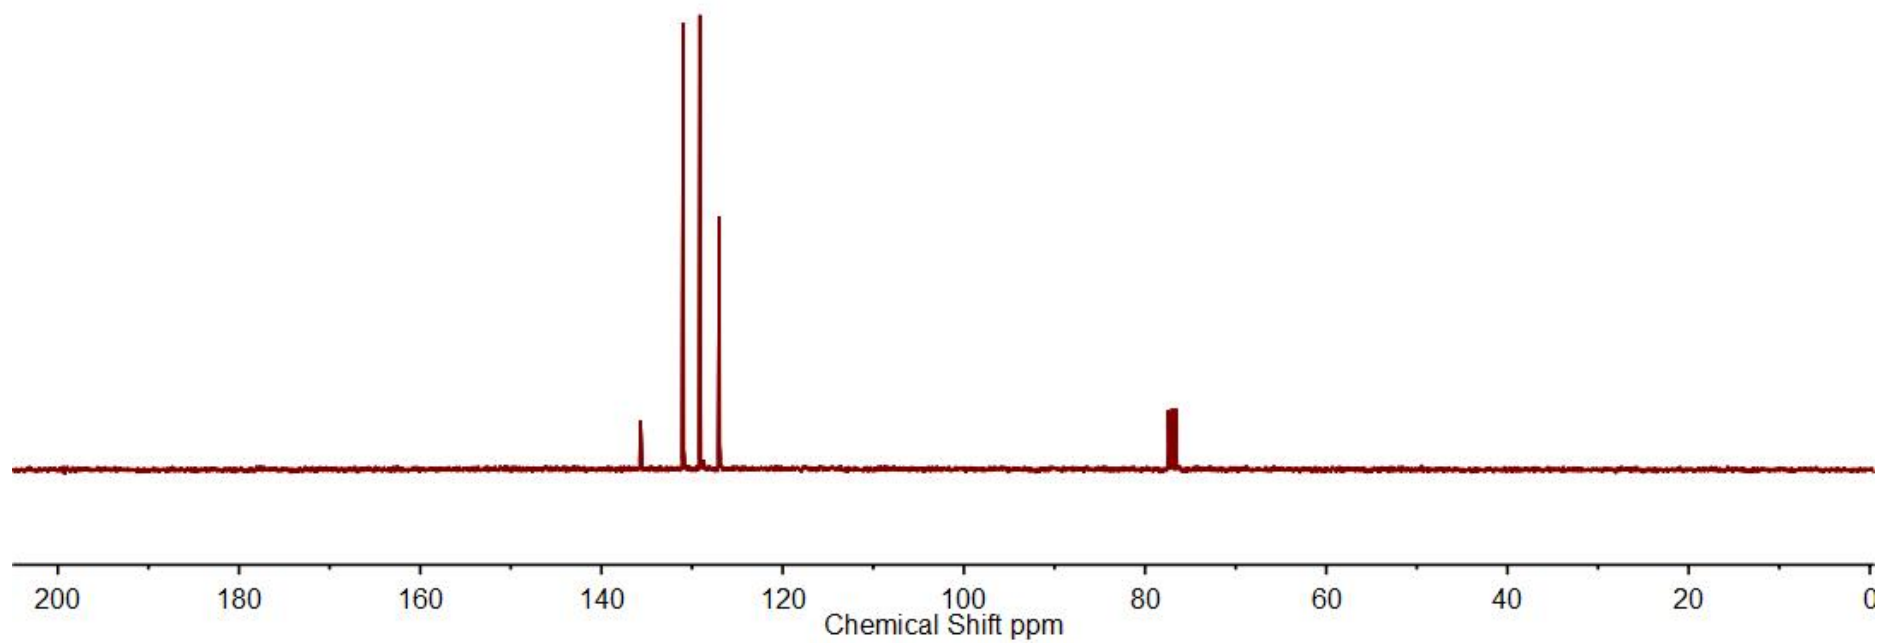

3b, DMSO-*d*<sub>6</sub>, <sup>1</sup>H NMR 300 MHz

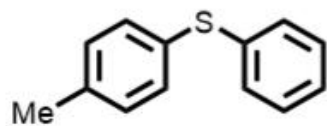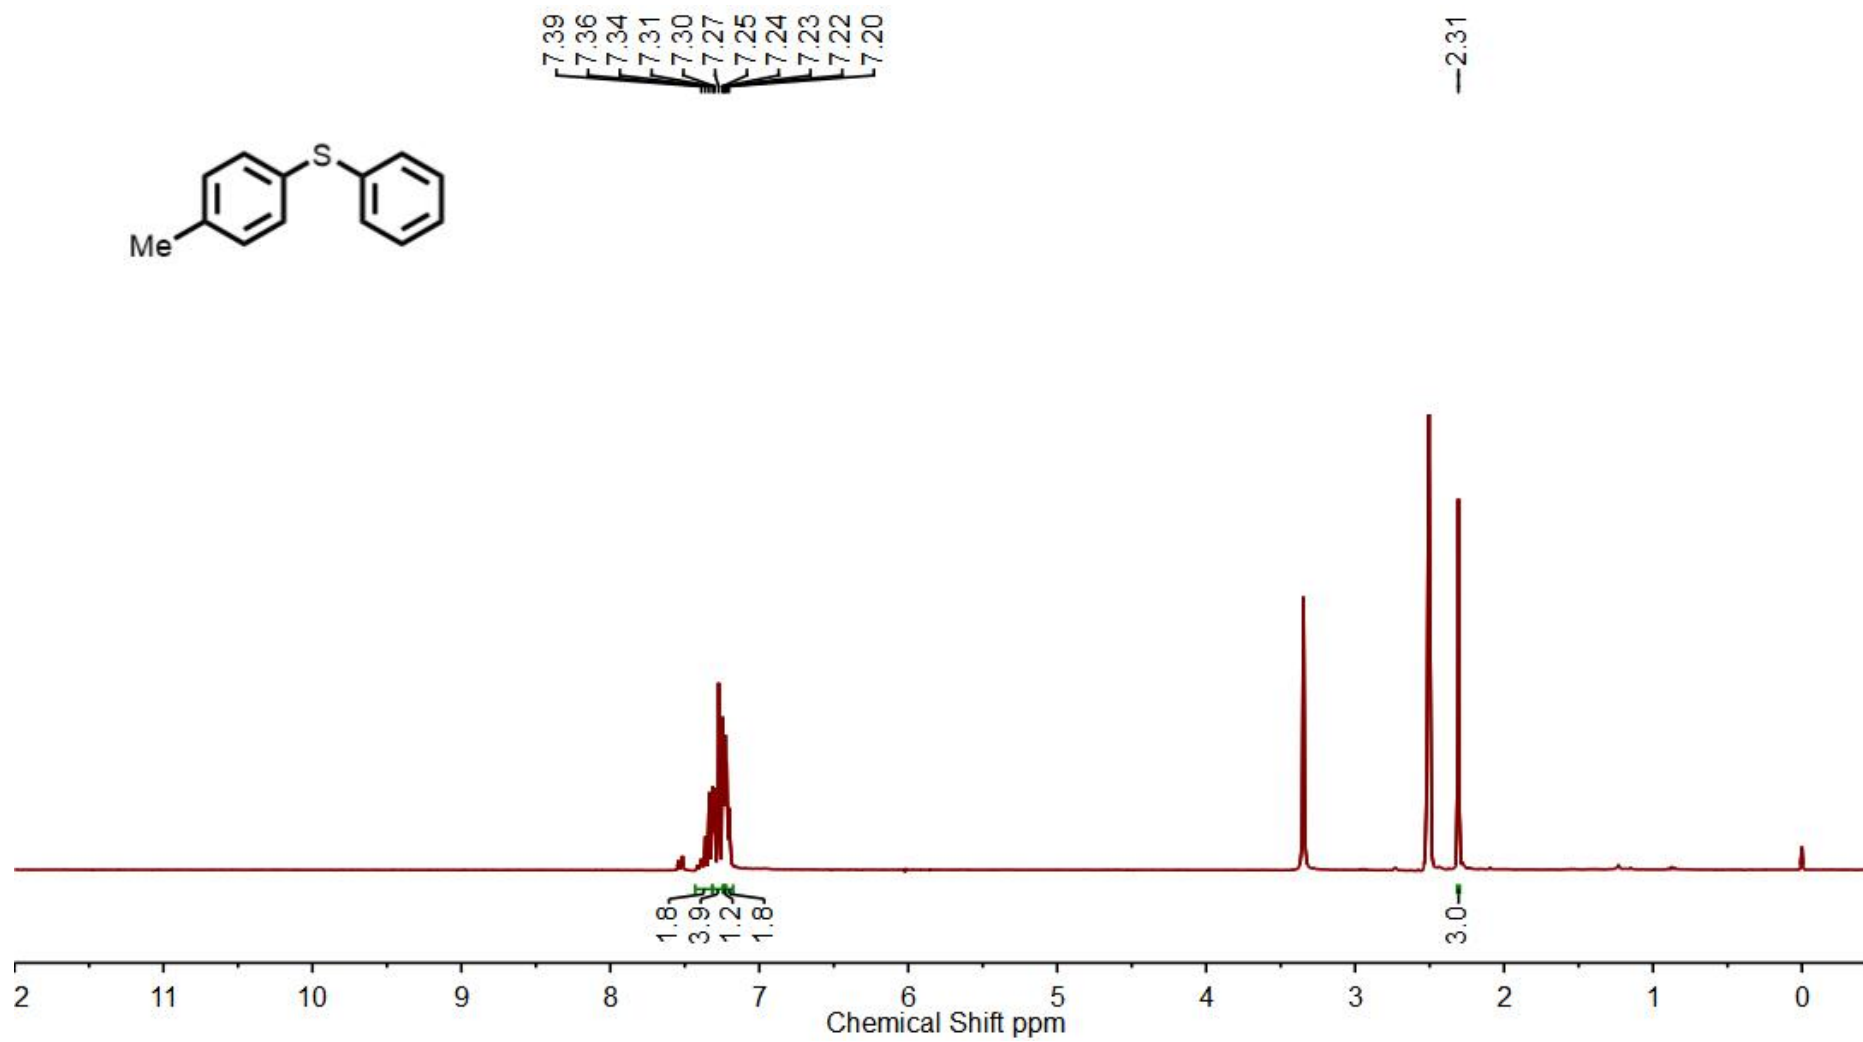

3b, DMSO-*d*<sub>6</sub>, <sup>13</sup>C NMR 75 MHz

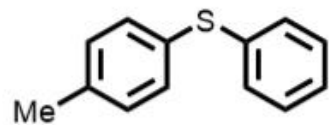

137.66  
136.24  
132.08  
130.38  
130.33  
129.51  
129.45  
126.78

—20.71

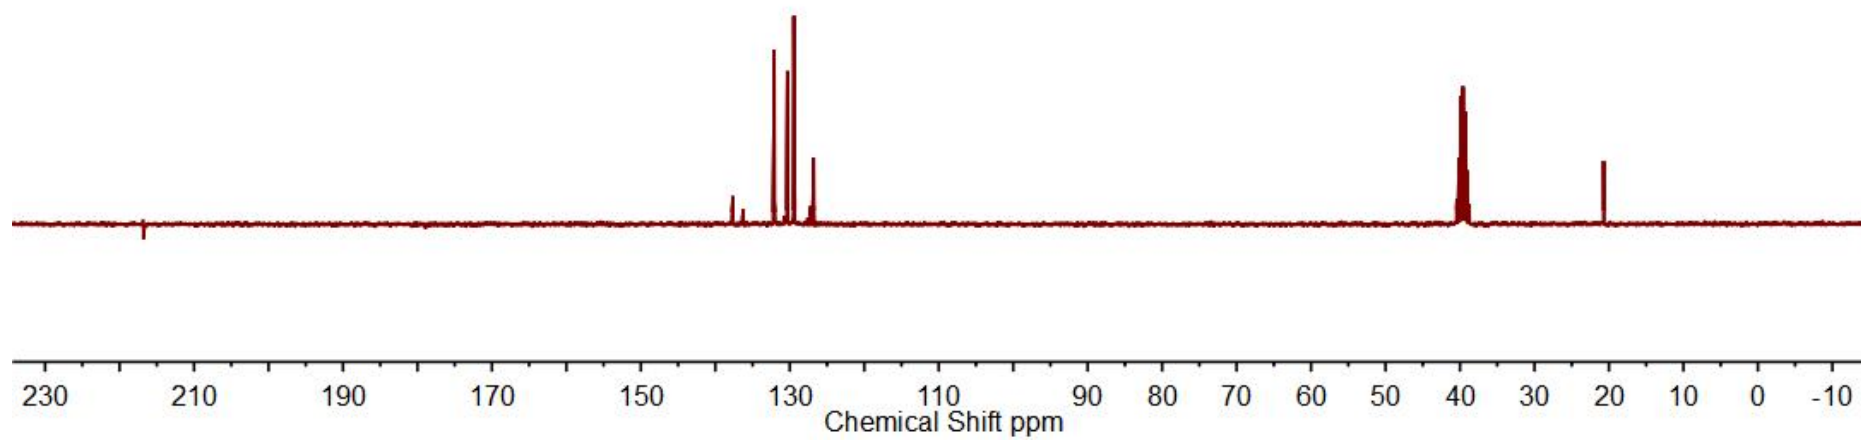

3c, CDCl<sub>3</sub>, <sup>1</sup>H NMR 300 MHz

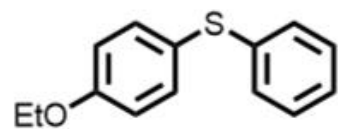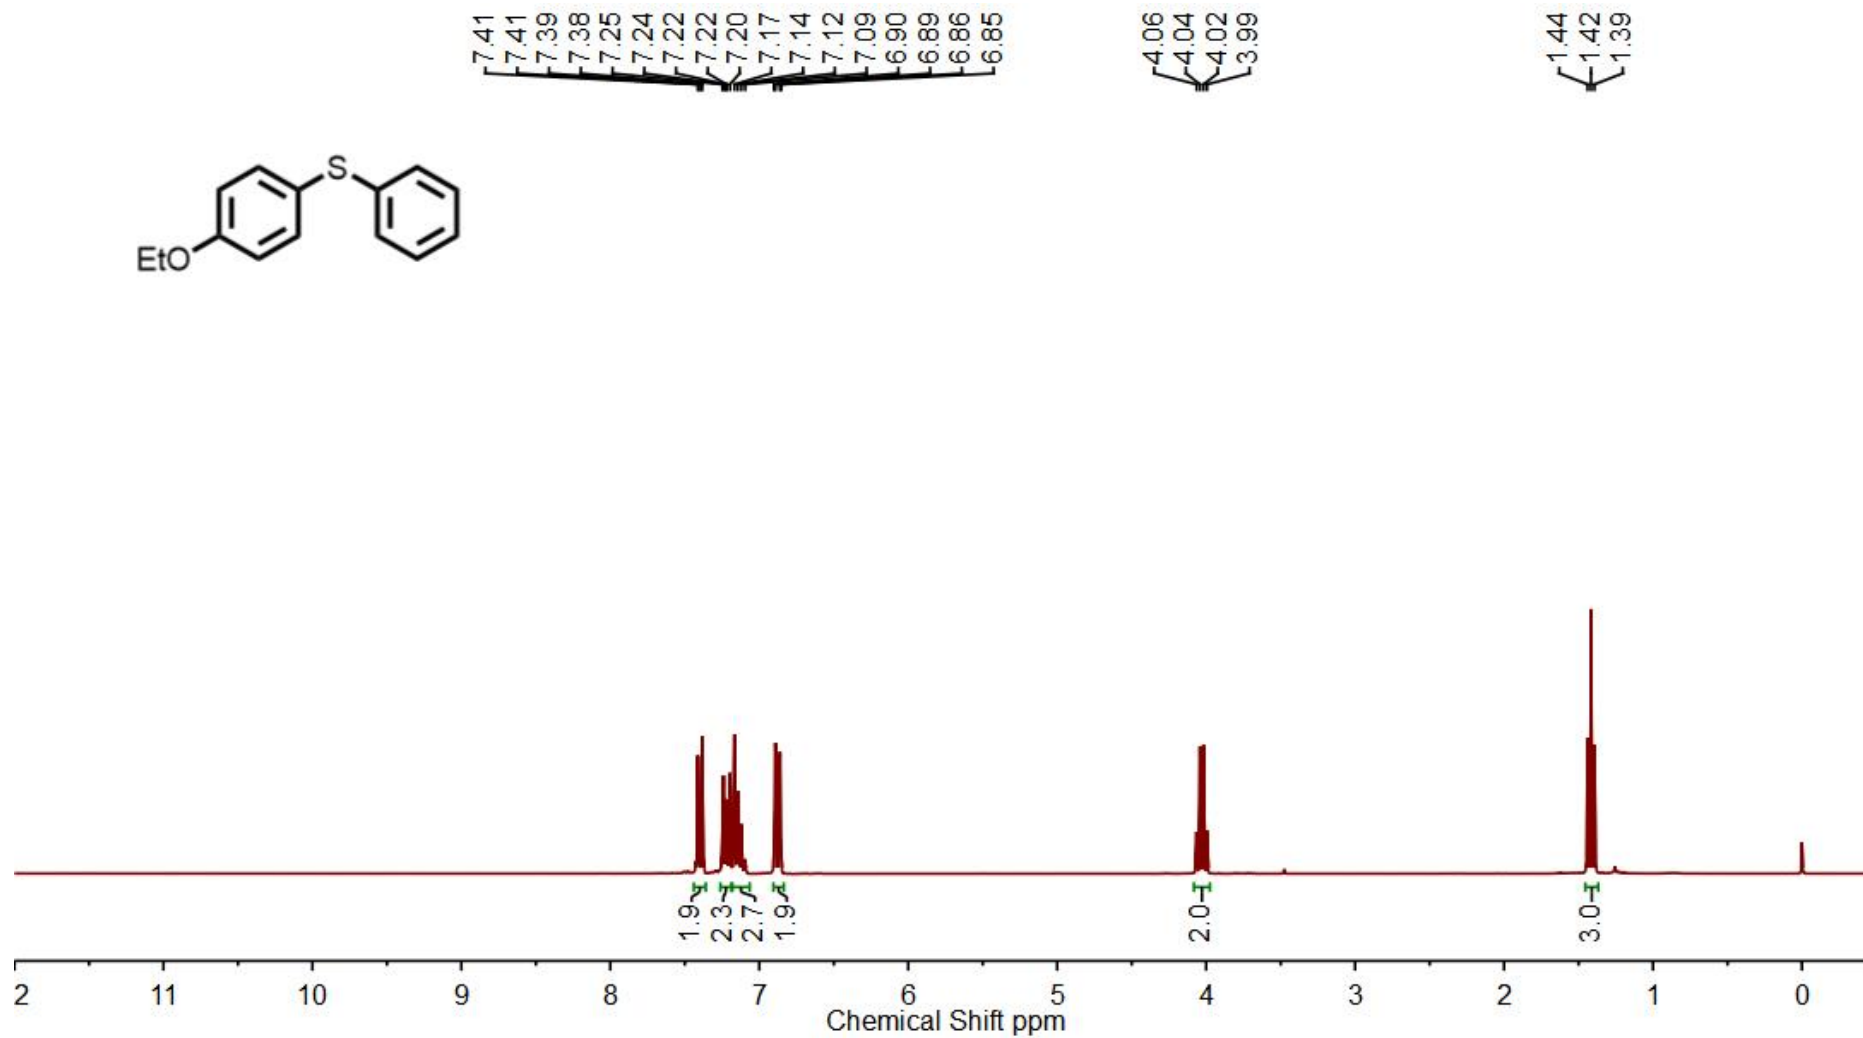

3c, CDCl<sub>3</sub>, <sup>13</sup>C NMR 300 MHz

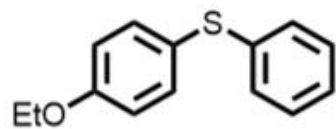

—159.13

138.60  
135.30  
128.79  
128.02  
125.59  
123.90

—63.48

—14.69

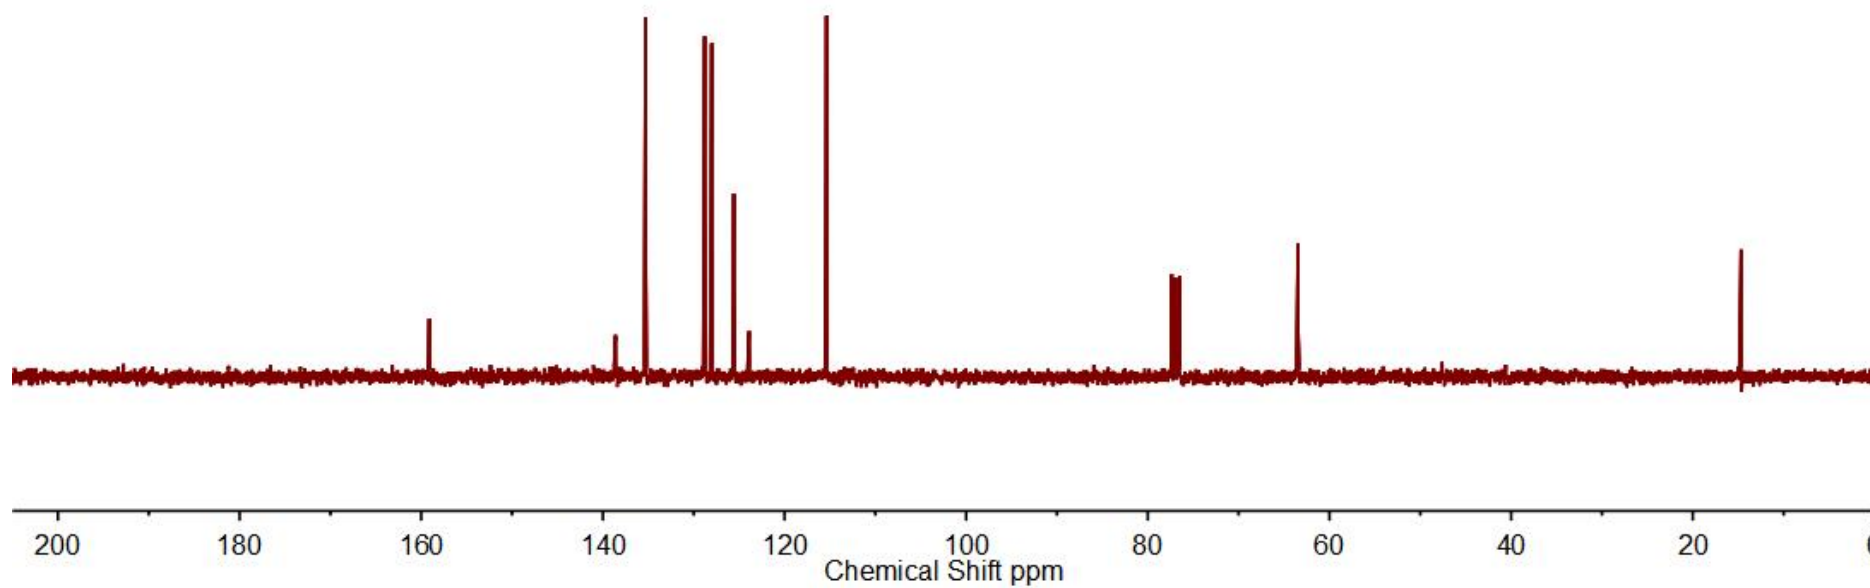

3d, CDCl<sub>3</sub>, <sup>1</sup>H NMR 300 MHz

7.41  
7.40  
7.39  
7.38  
7.38  
7.37  
7.36  
7.29  
7.29  
7.28  
7.27  
7.26  
7.26  
7.25  
7.24  
7.24  
7.23  
7.23  
7.22  
7.22  
7.22  
7.20  
7.06  
7.05  
7.03  
7.03  
7.02  
7.01  
7.00

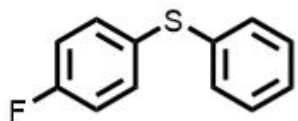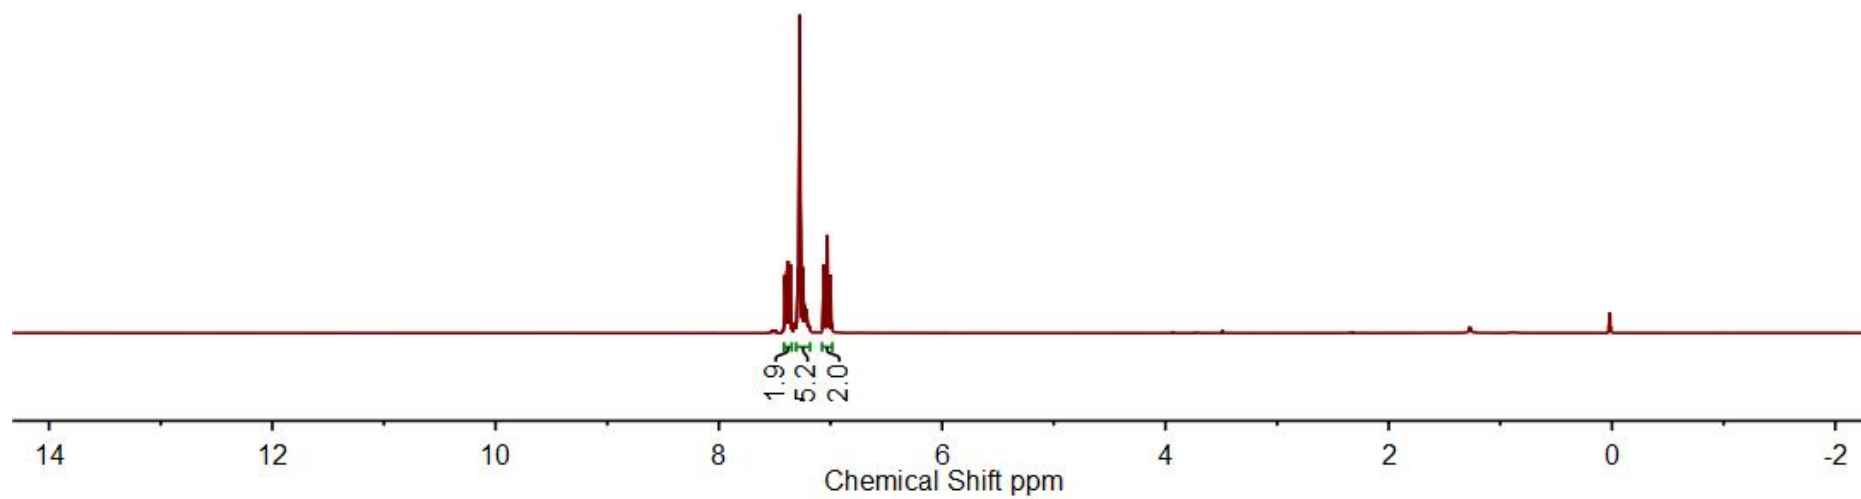



3d, CDCl<sub>3</sub>, <sup>13</sup>C NMR 75 MHz

163.98  
160.69

136.60  
134.09  
133.98  
129.90  
129.13  
126.71  
116.50  
116.21

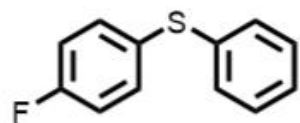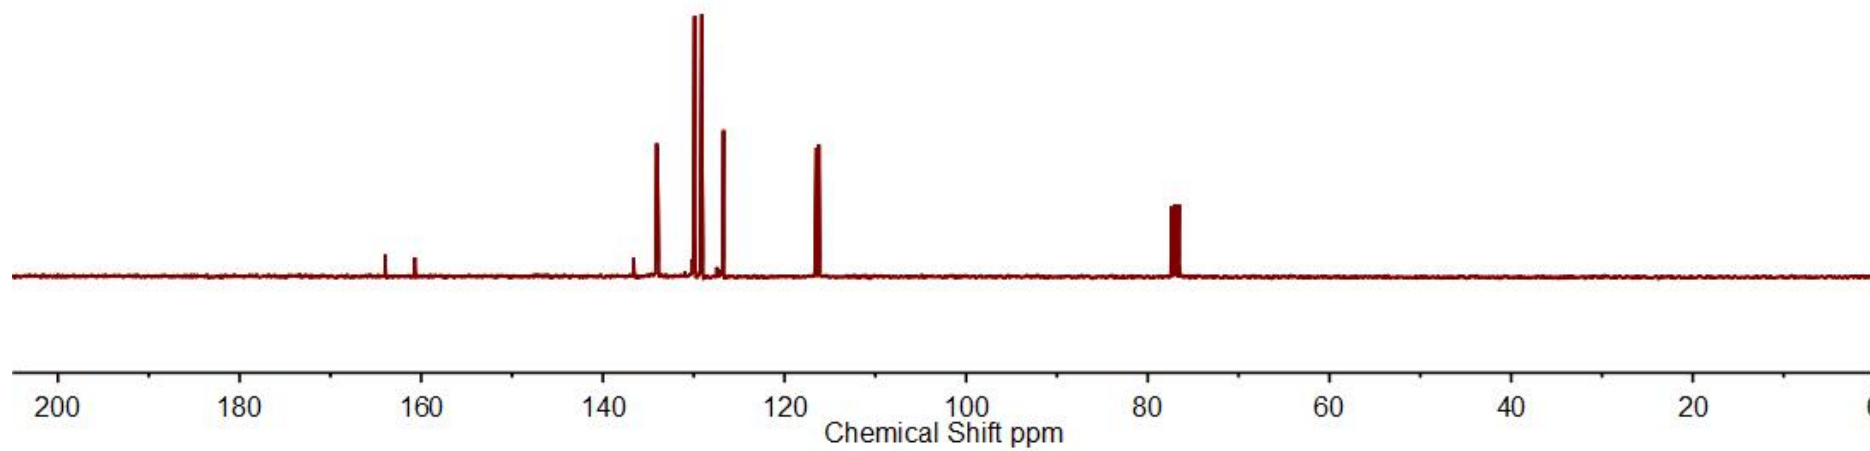

3d, CDCl<sub>3</sub>, <sup>19</sup>F NMR 377 MHz

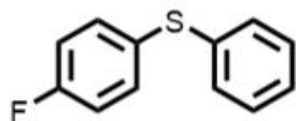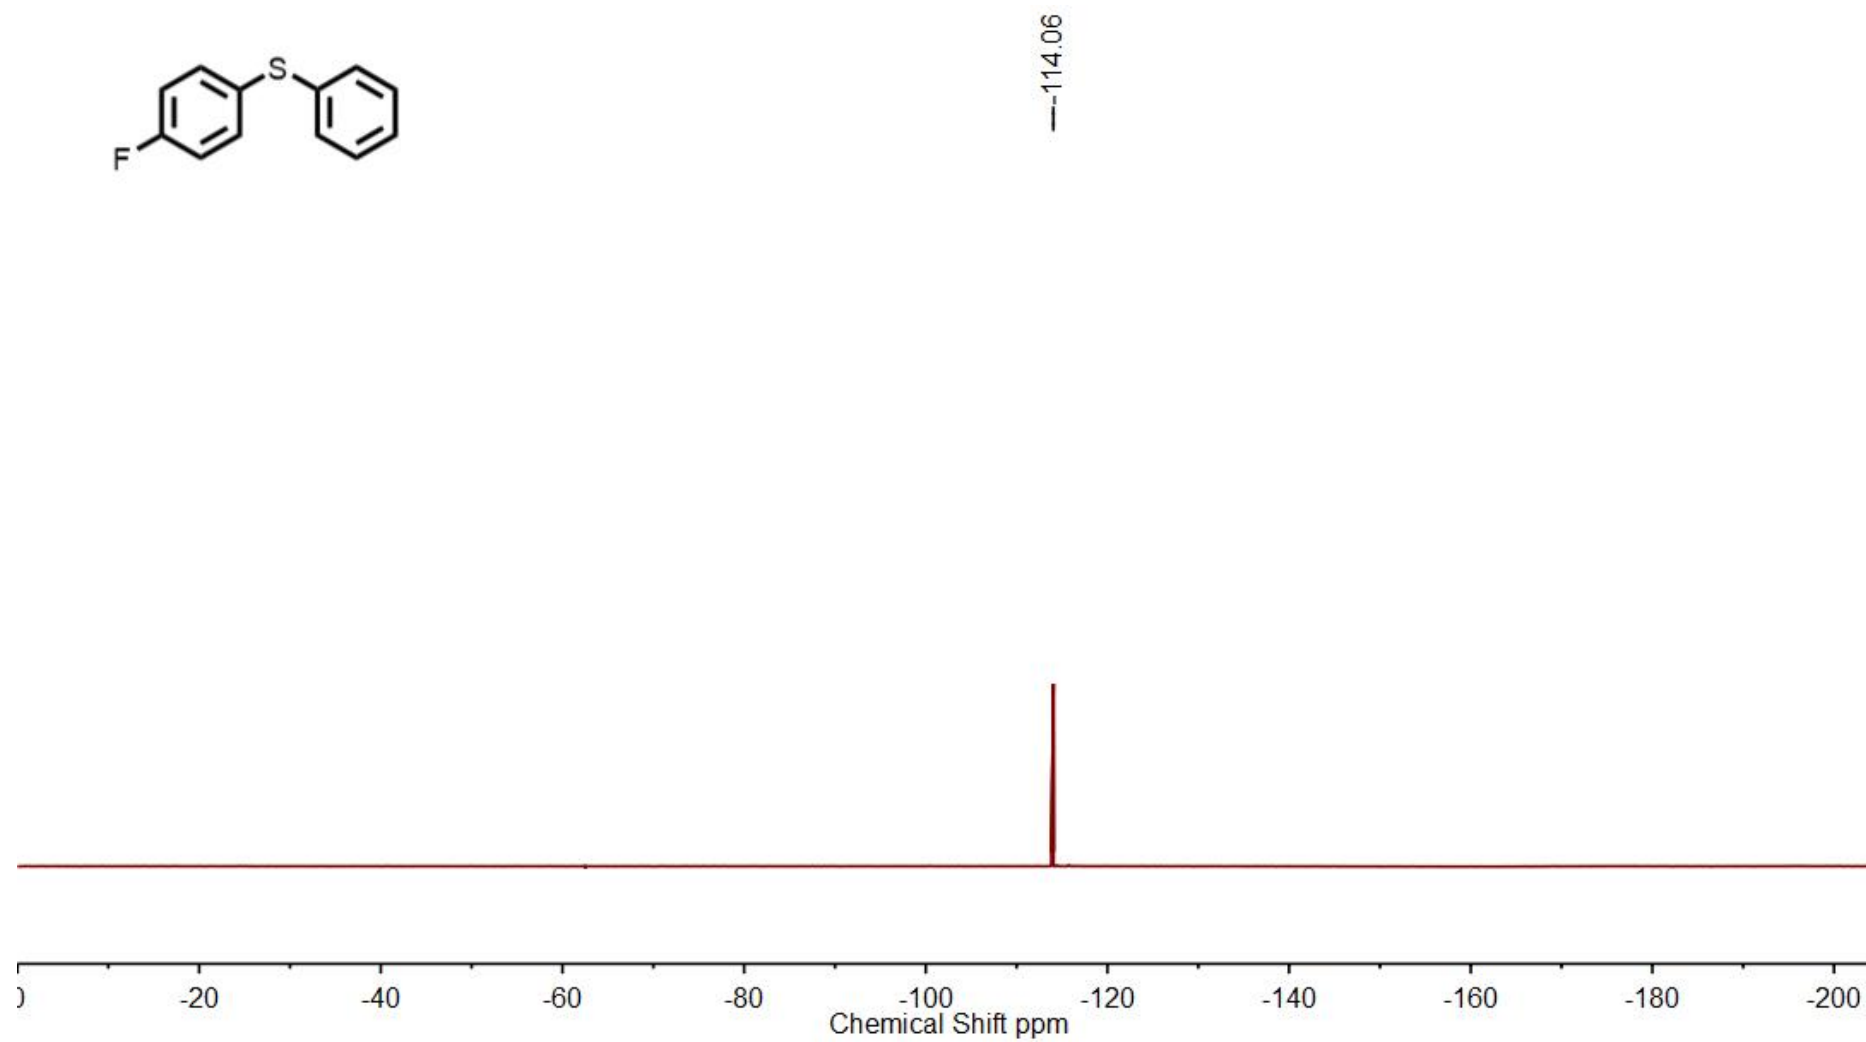

3e, DMSO-*d*<sub>6</sub>, <sup>1</sup>H NMR 400 MHz

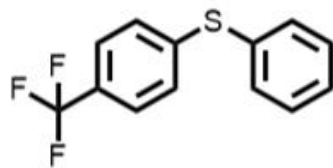

7.68  
7.66  
7.54  
7.53  
7.52  
7.52  
7.51  
7.51  
7.50  
7.50  
7.49  
7.48  
7.48  
7.47  
7.35  
7.33

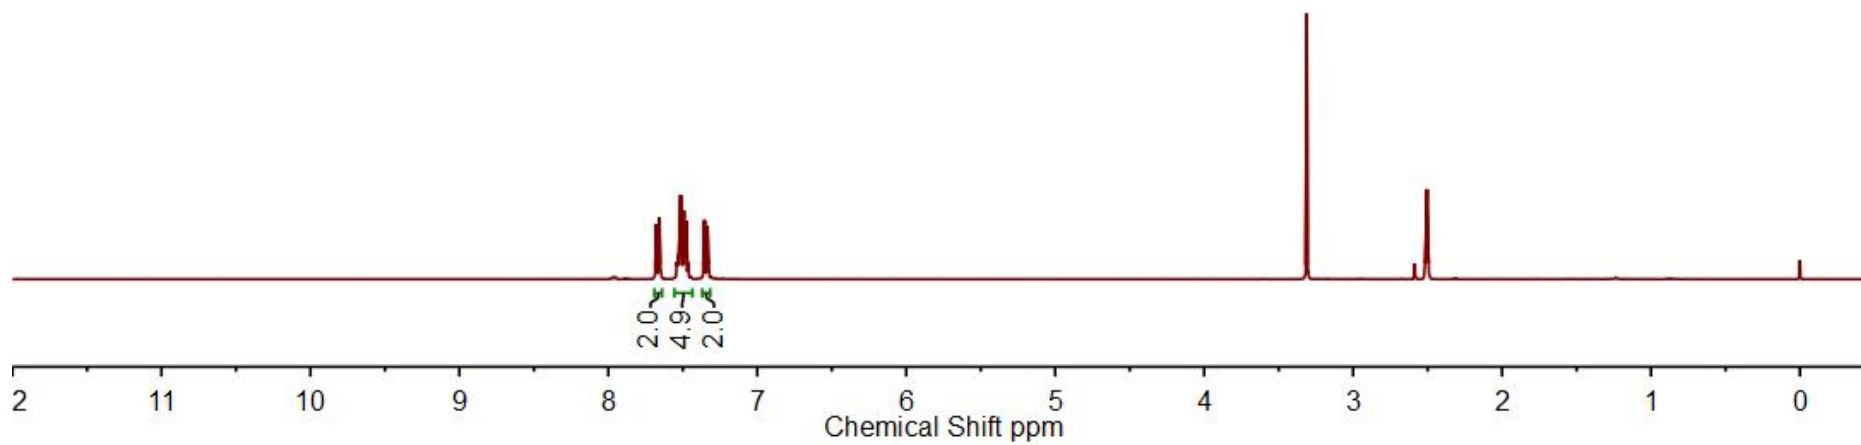

3e, DMSO-*d*<sub>6</sub>, <sup>13</sup>C NMR 101 MHz

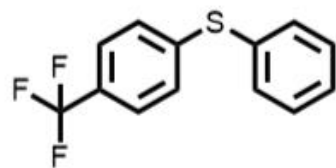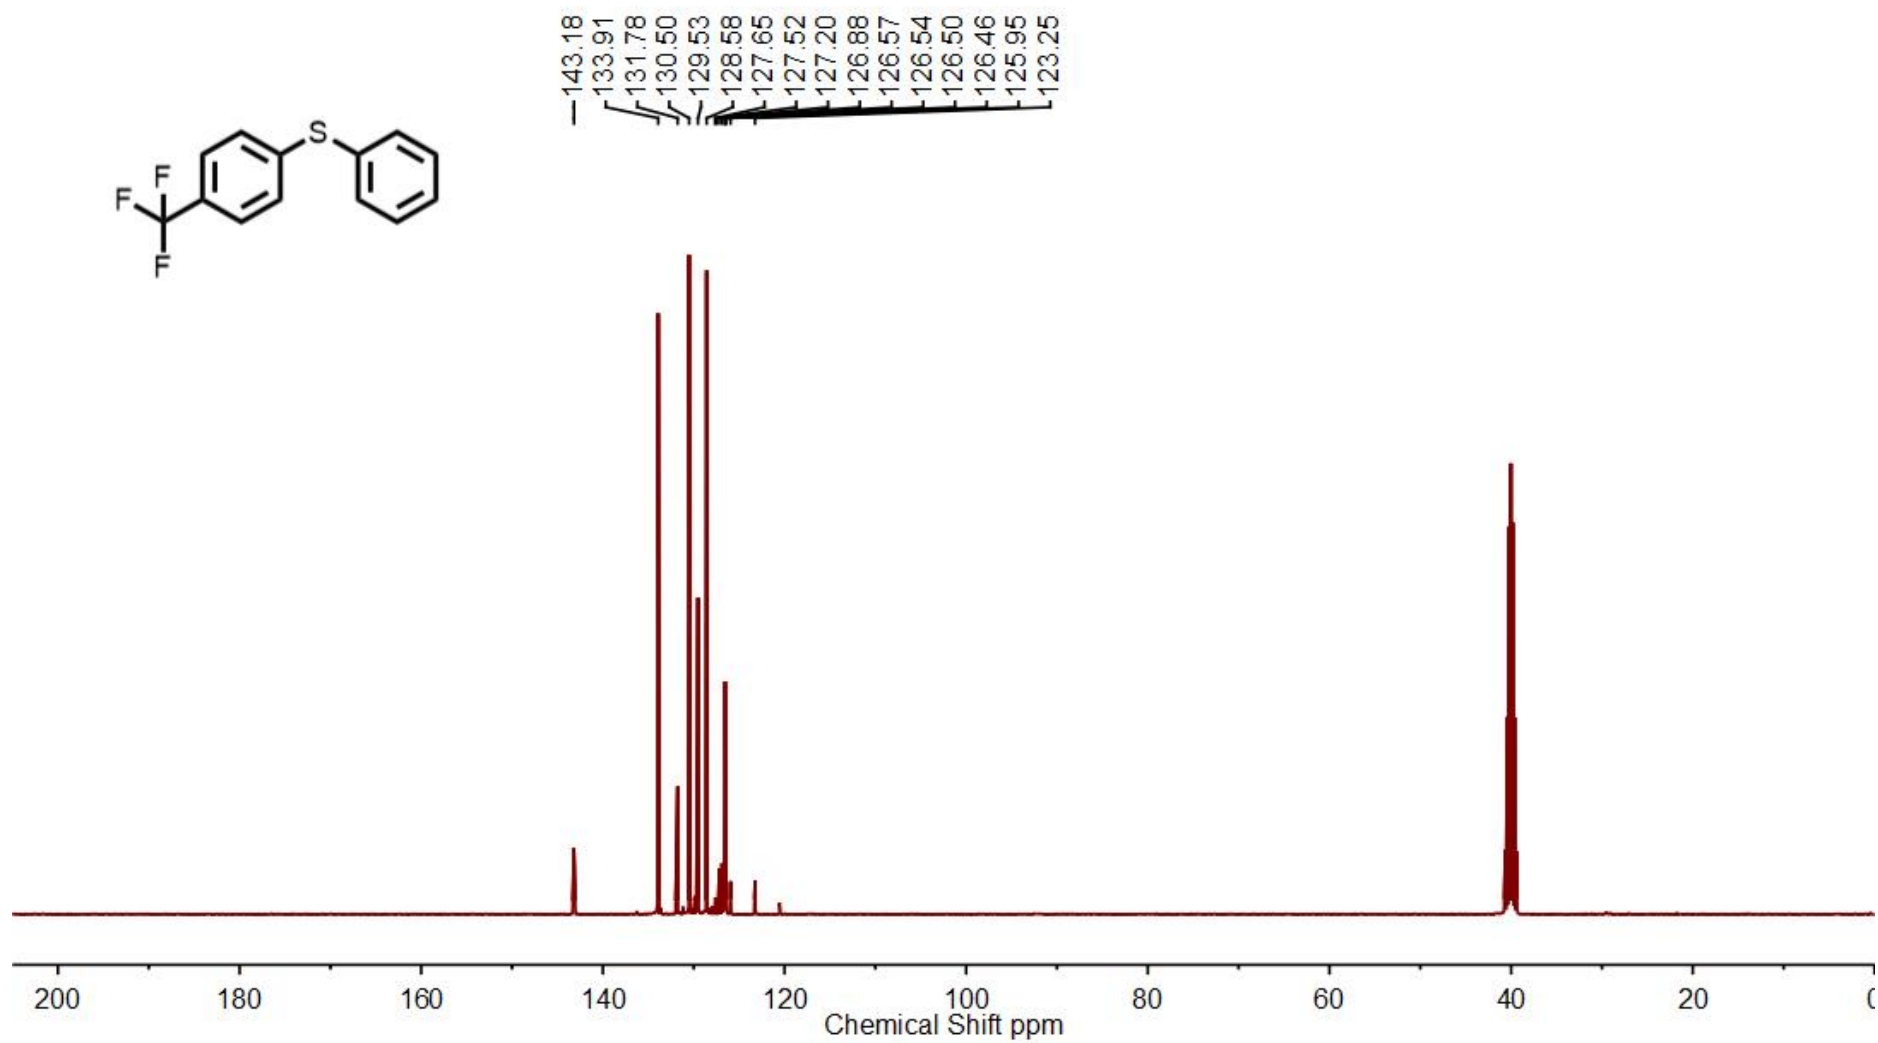

3e, DMSO-*d*<sub>6</sub>, <sup>19</sup>F NMR 377 MHz

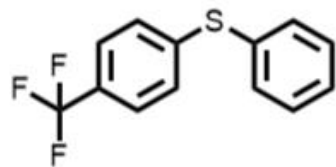

—60.94

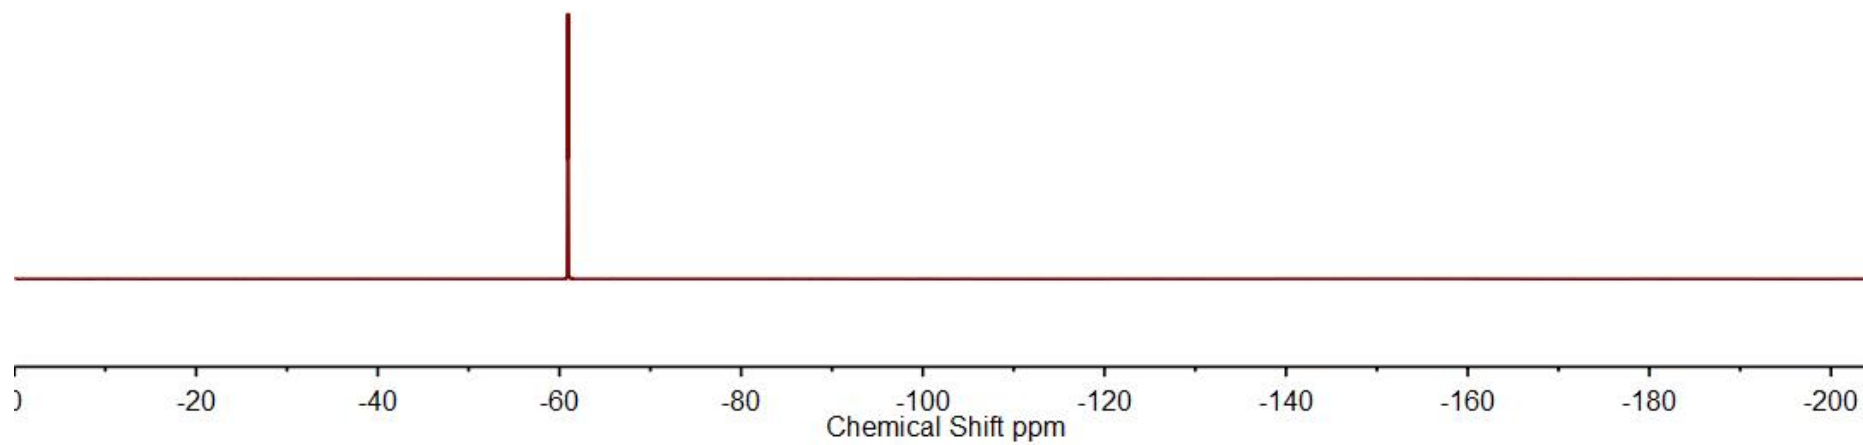

3f, CDCl<sub>3</sub>, <sup>1</sup>H NMR 300 MHz

7.53  
7.52  
7.52  
7.51  
7.51  
7.50  
7.49  
7.48  
7.47  
7.46  
7.45  
7.44  
7.44  
7.44  
7.43  
7.42  
7.18  
7.18  
7.17  
7.15  
7.15

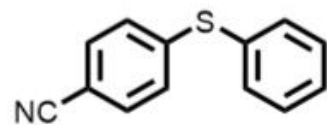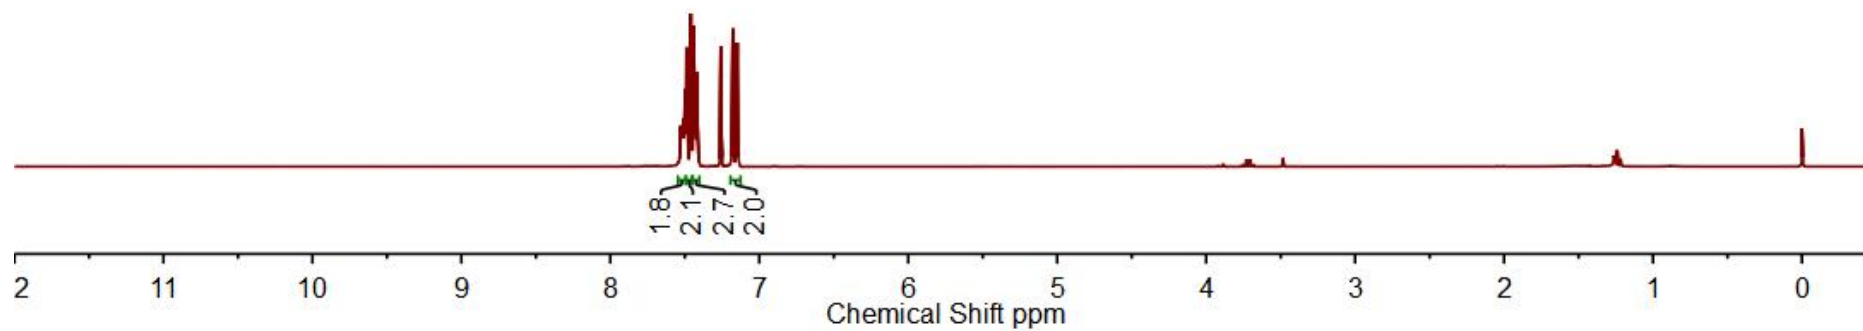

3f, CDCl<sub>3</sub>, <sup>13</sup>C NMR 75 MHz

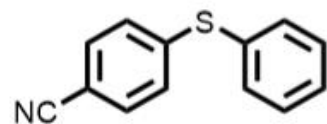

—145.65  
134.42  
132.29  
130.76  
129.85  
129.32  
127.24  
—118.72  
—108.63

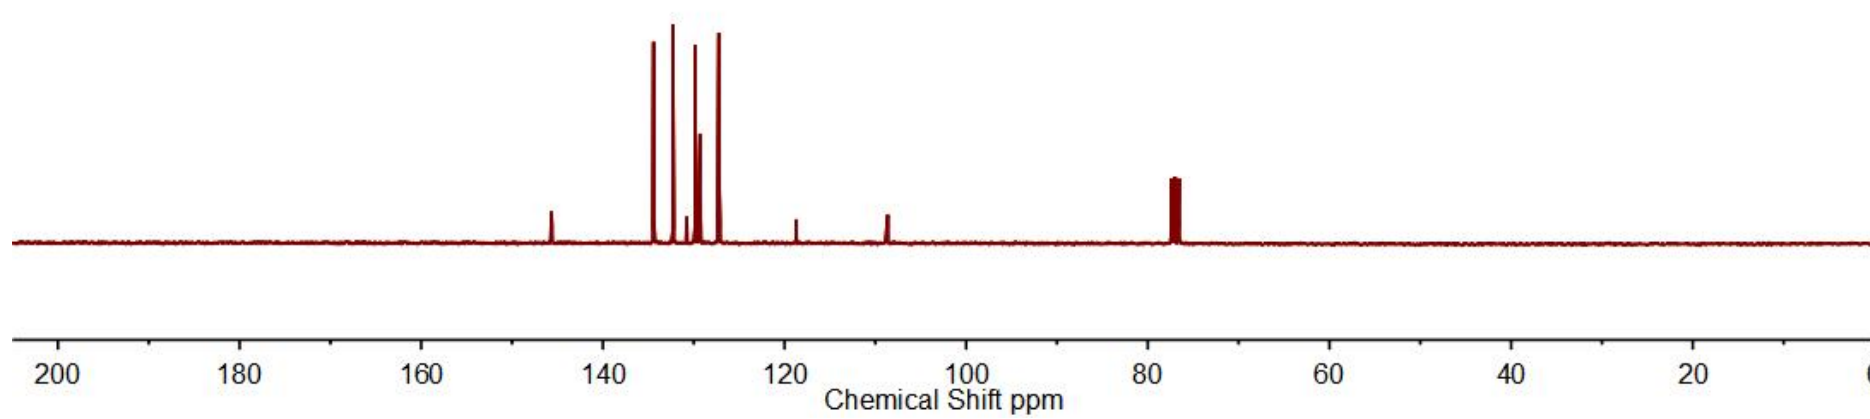

3g, CDCl<sub>3</sub>, <sup>1</sup>H NMR 300 MHz

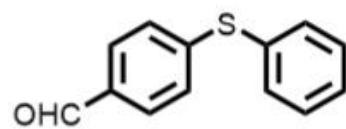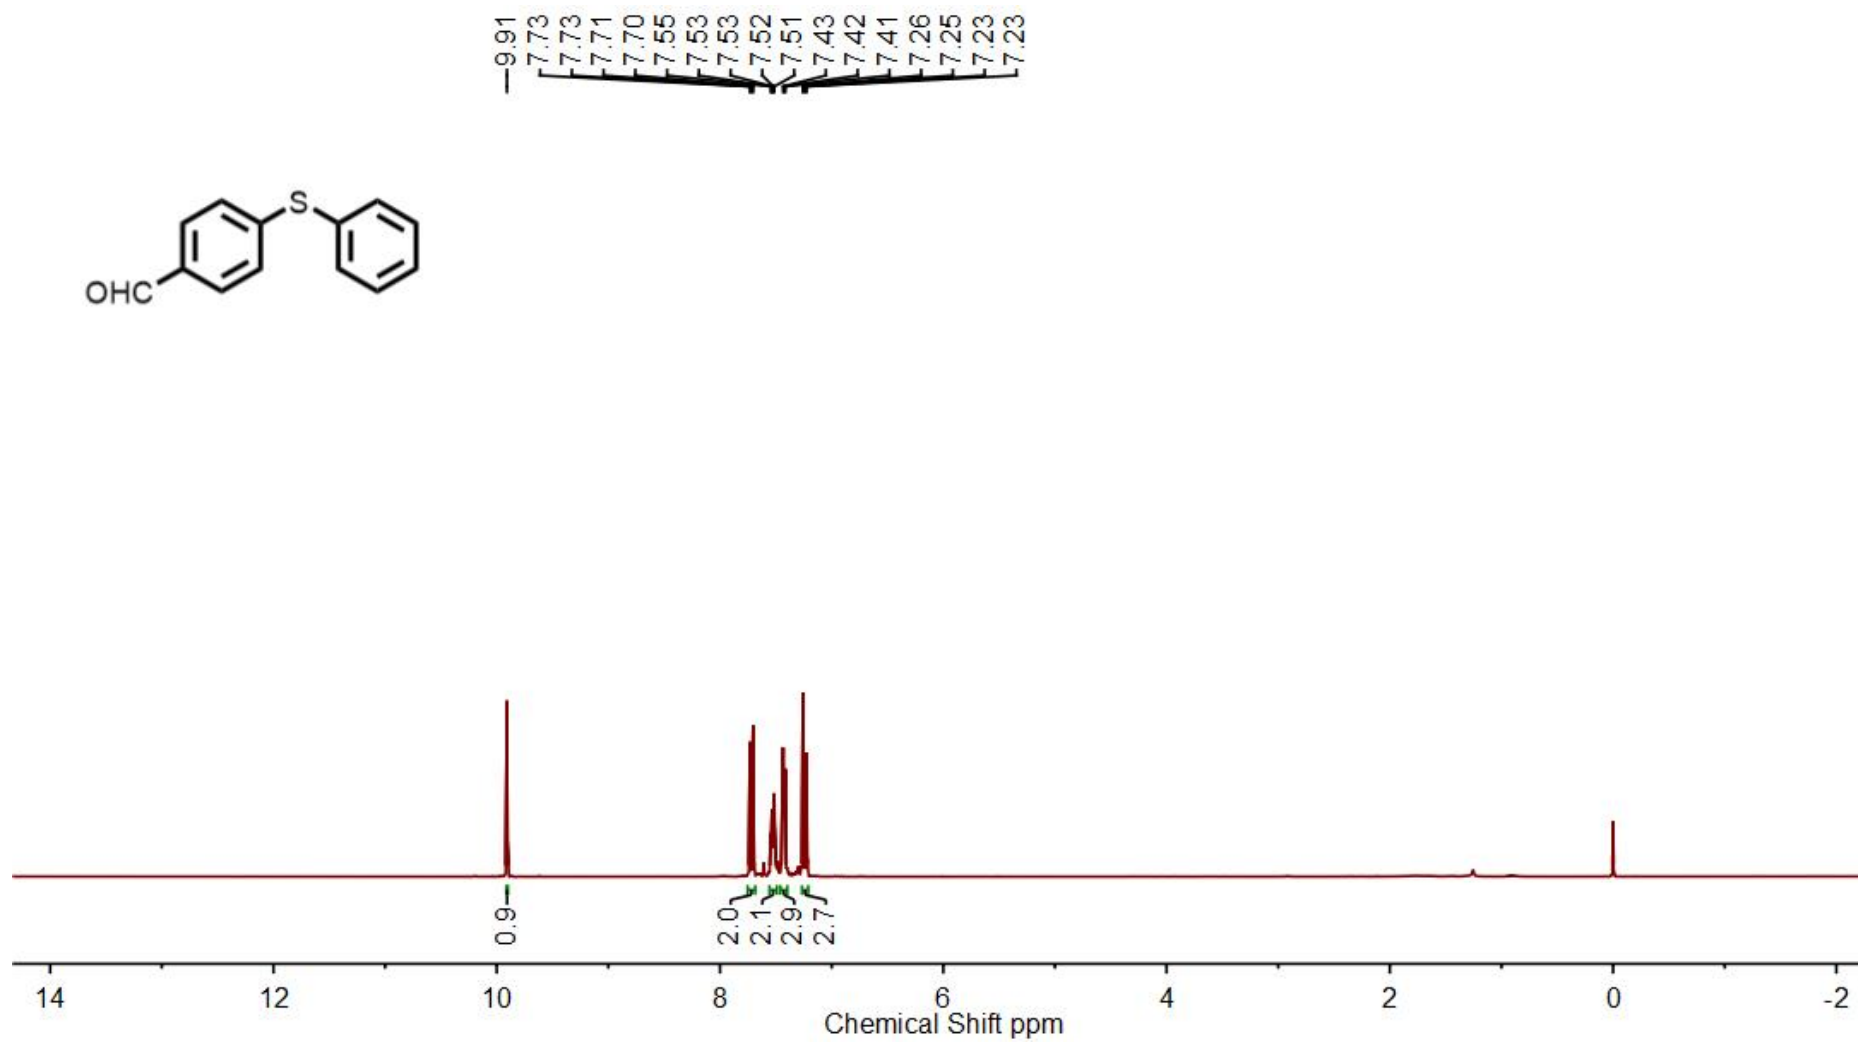



3g, CDCl<sub>3</sub>, <sup>13</sup>C NMR 75 MHz

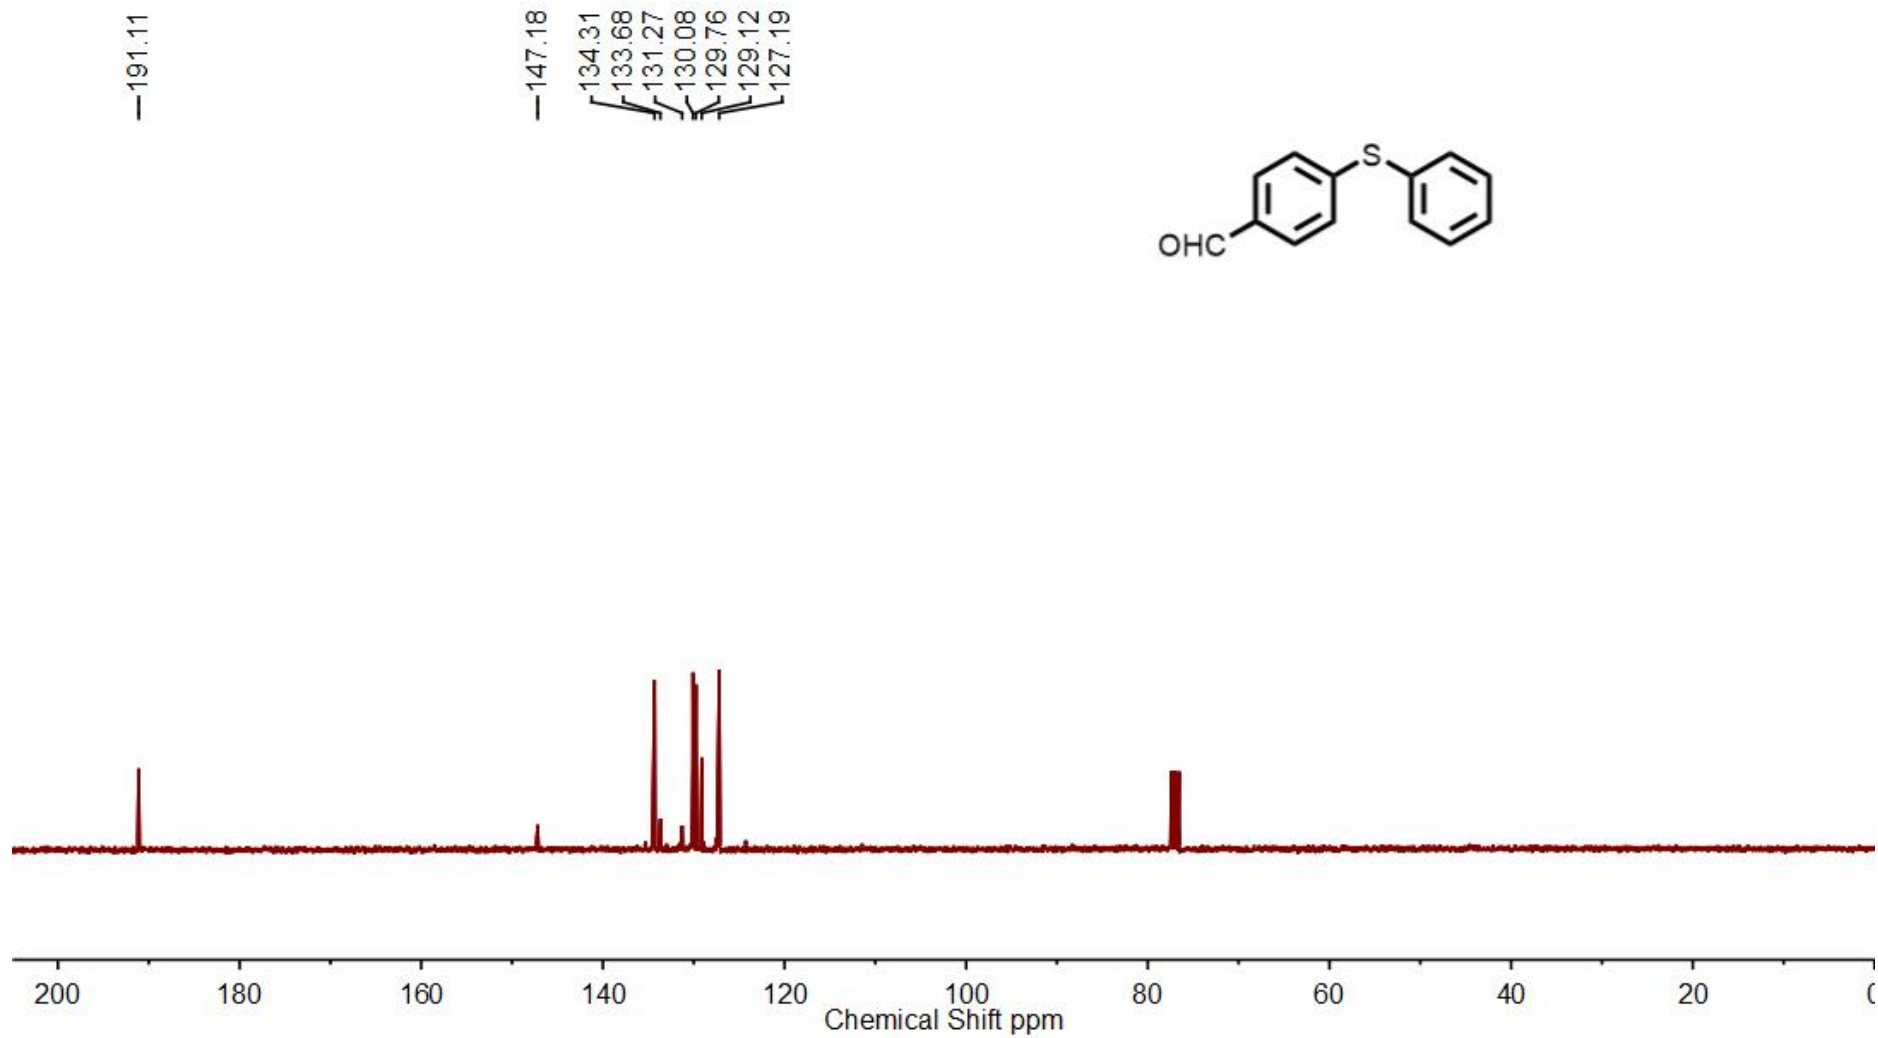

3h, DMSO-*d*<sub>6</sub>, <sup>1</sup>H NMR 400 MHz

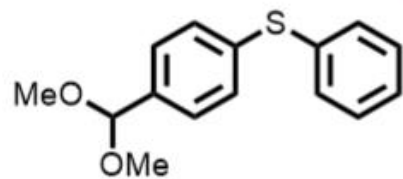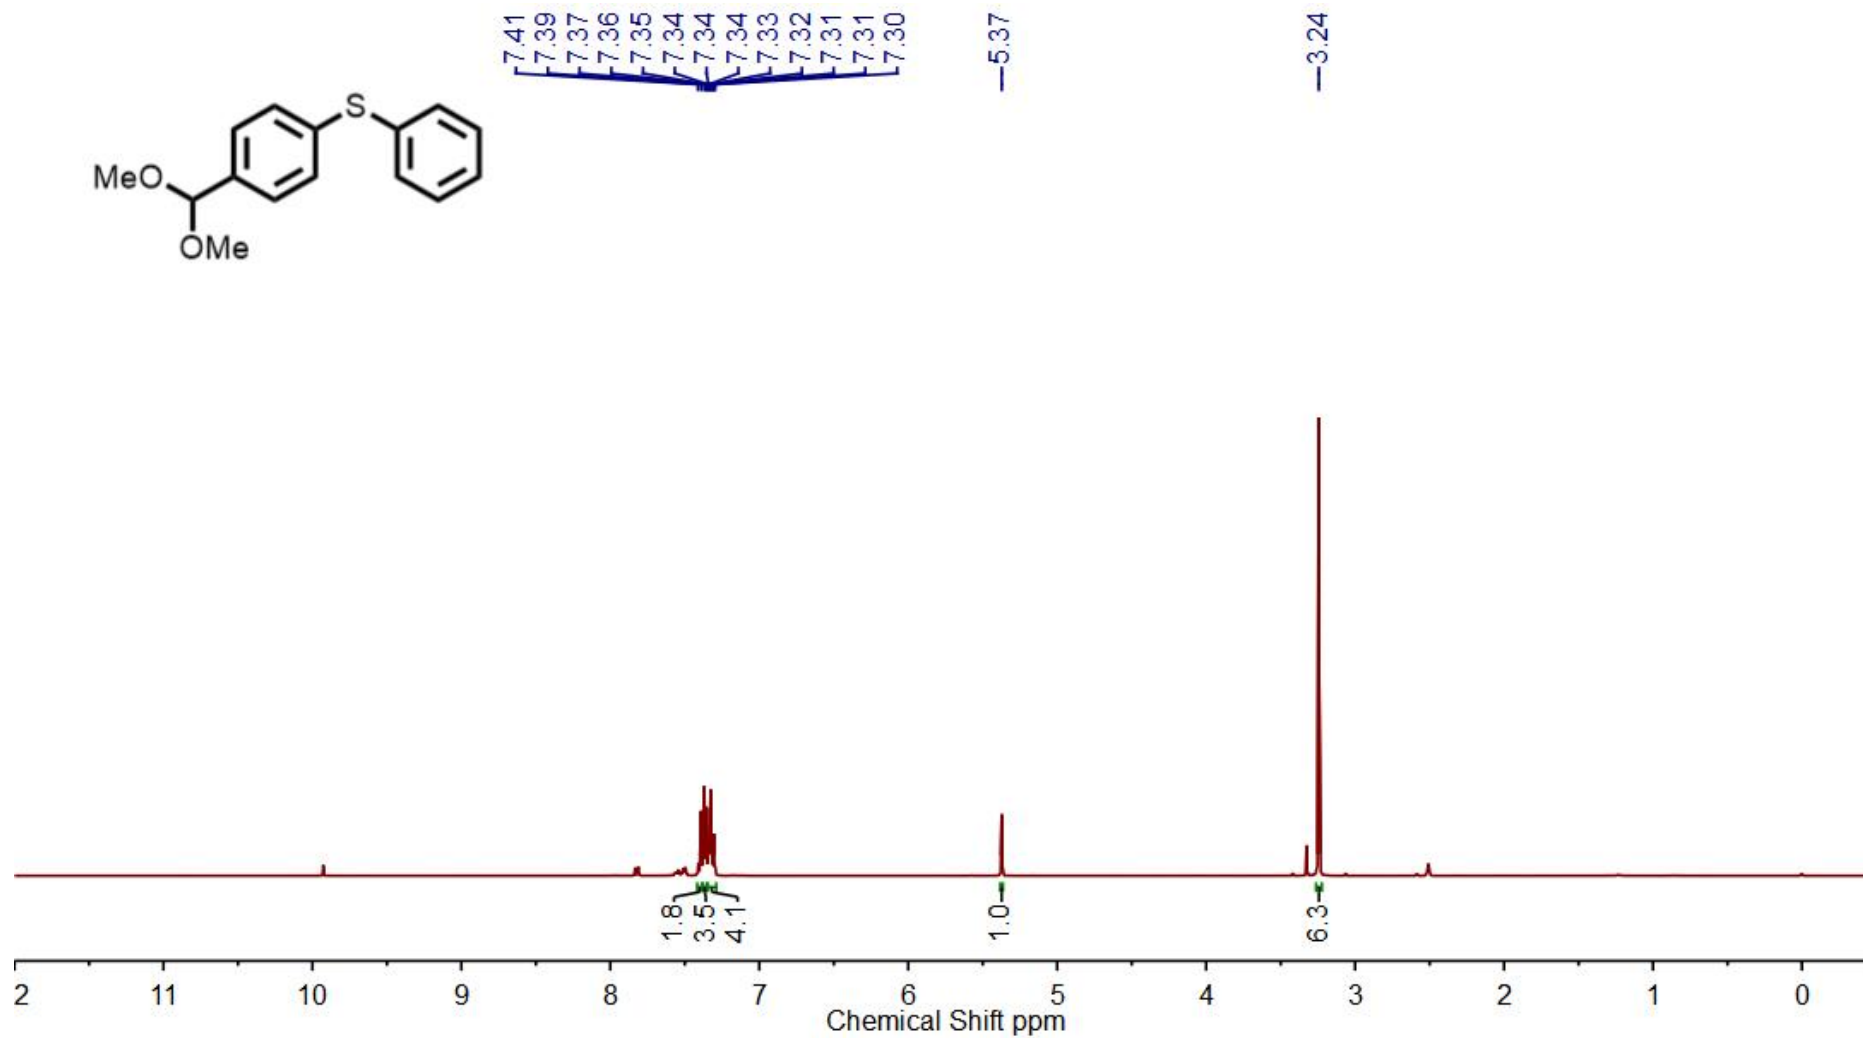

3h, DMSO-*d*<sub>6</sub>, <sup>13</sup>C NMR 101 MHz

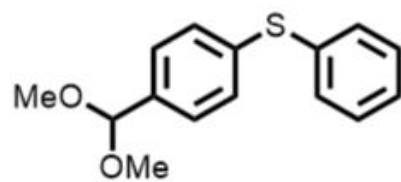

137.85  
135.63  
134.89  
134.36  
131.47  
130.72  
130.57  
130.08  
128.17  
128.07

102.69

53.08

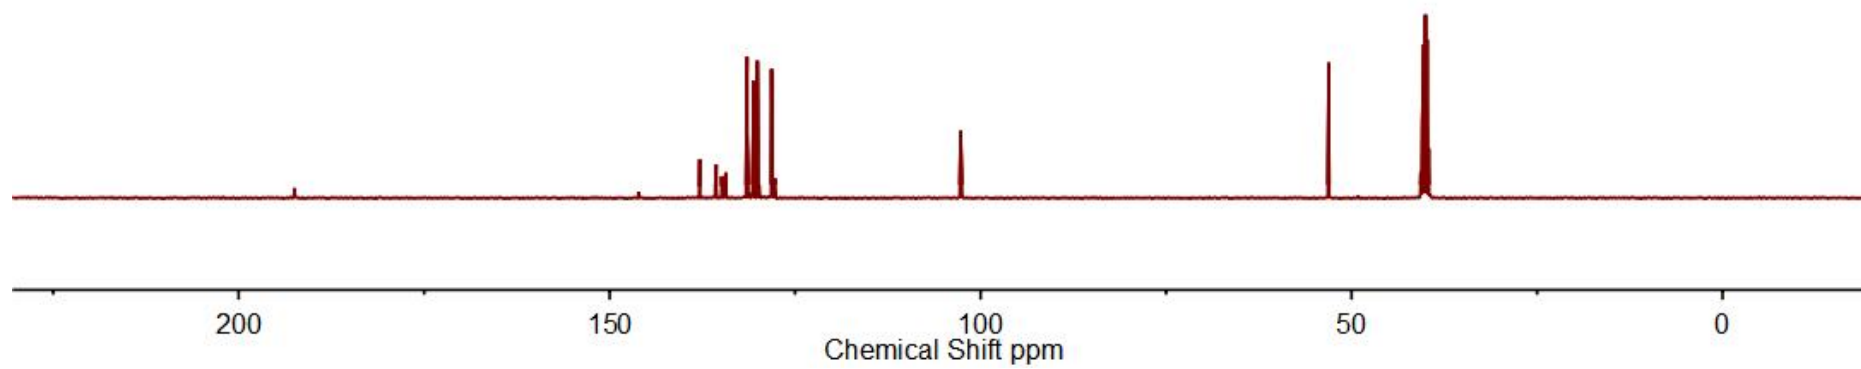

3i, CDCl<sub>3</sub>, <sup>1</sup>H NMR 300 MHz

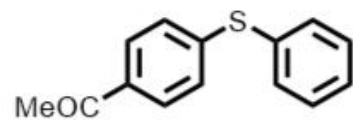

7.83  
7.80  
7.51  
7.50  
7.49  
7.48  
7.41  
7.39  
7.39  
7.26  
7.22  
7.19

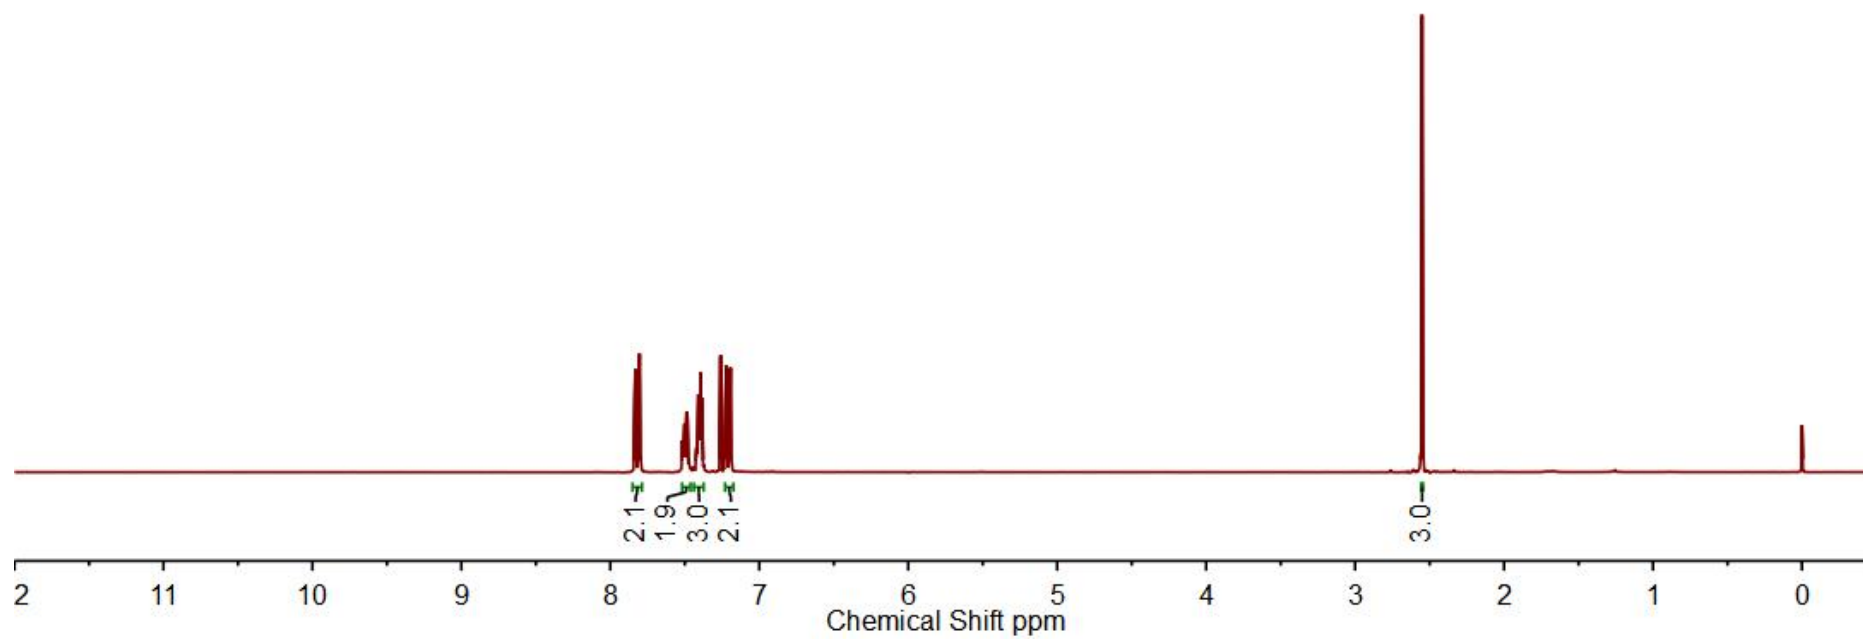

3i, CDCl<sub>3</sub>, <sup>13</sup>C NMR 75 MHz

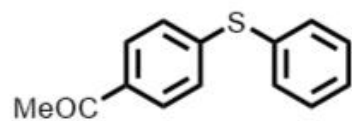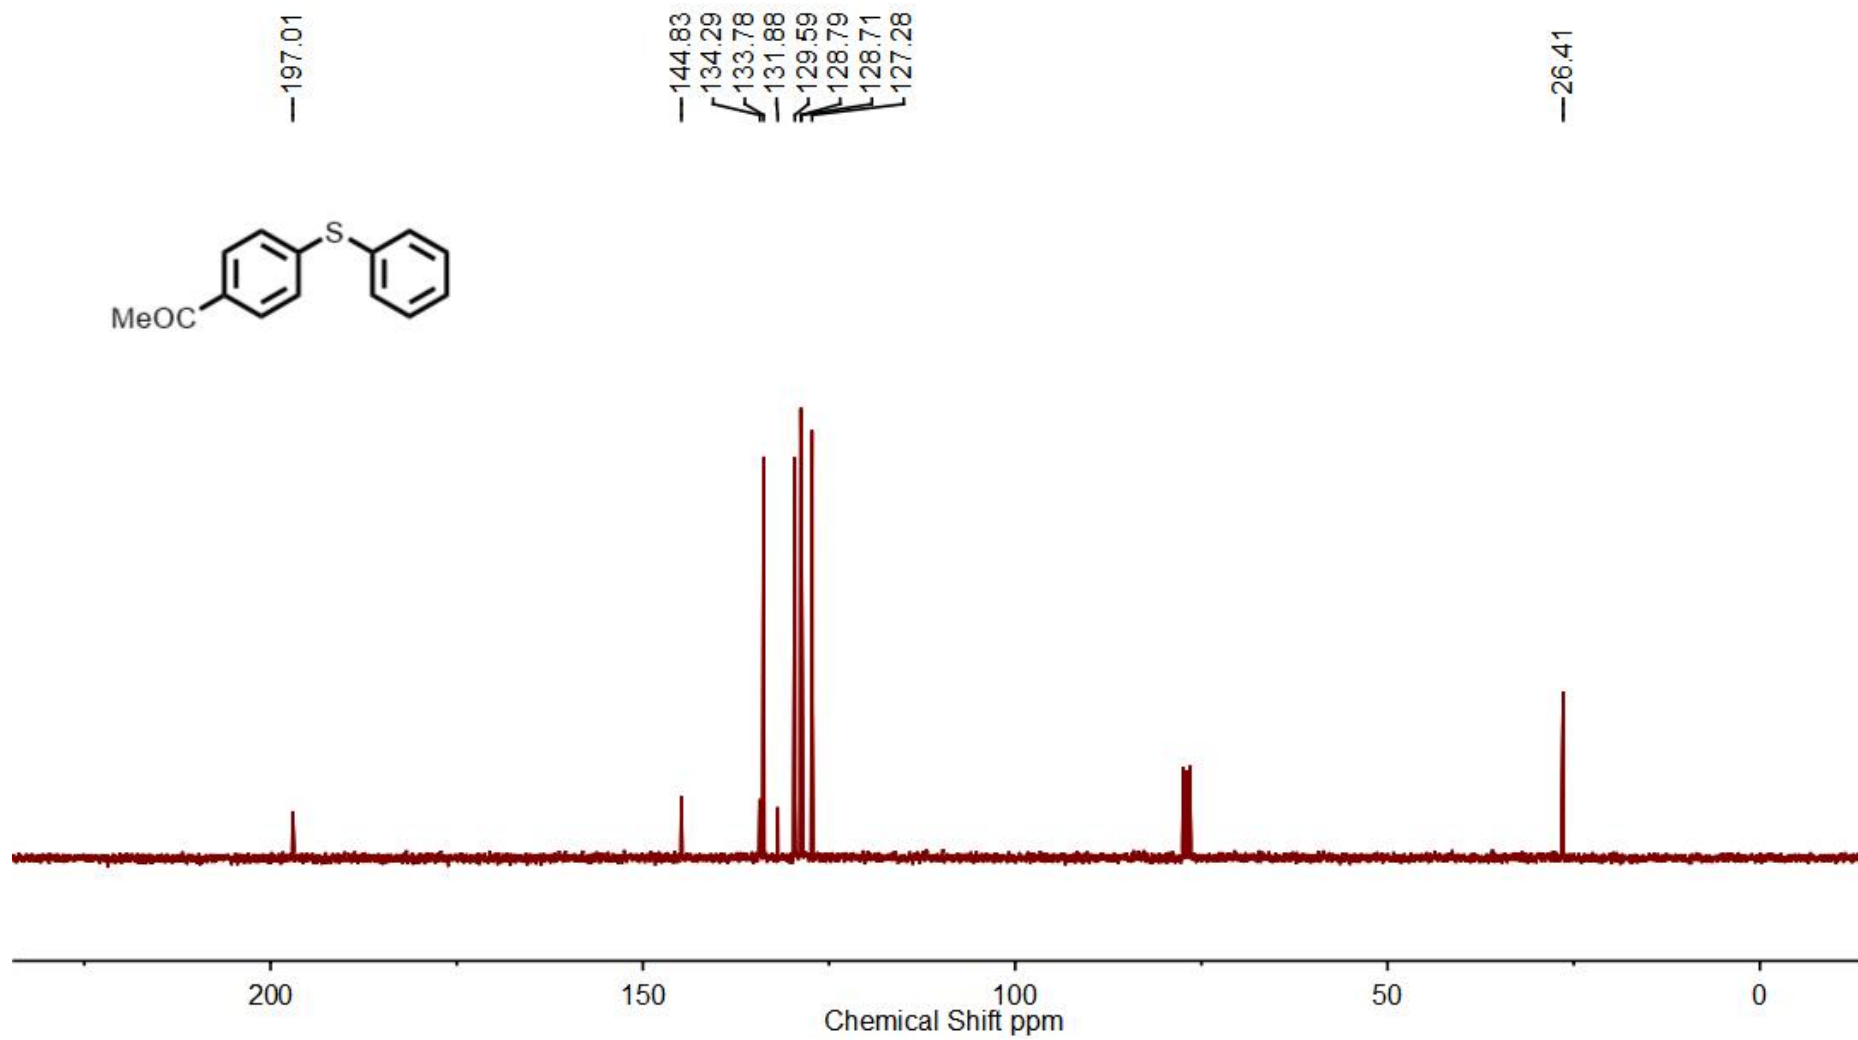

3j, CDCl<sub>3</sub>, <sup>1</sup>H NMR 300 MHz

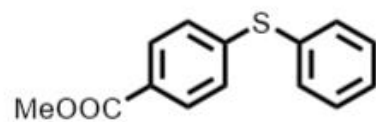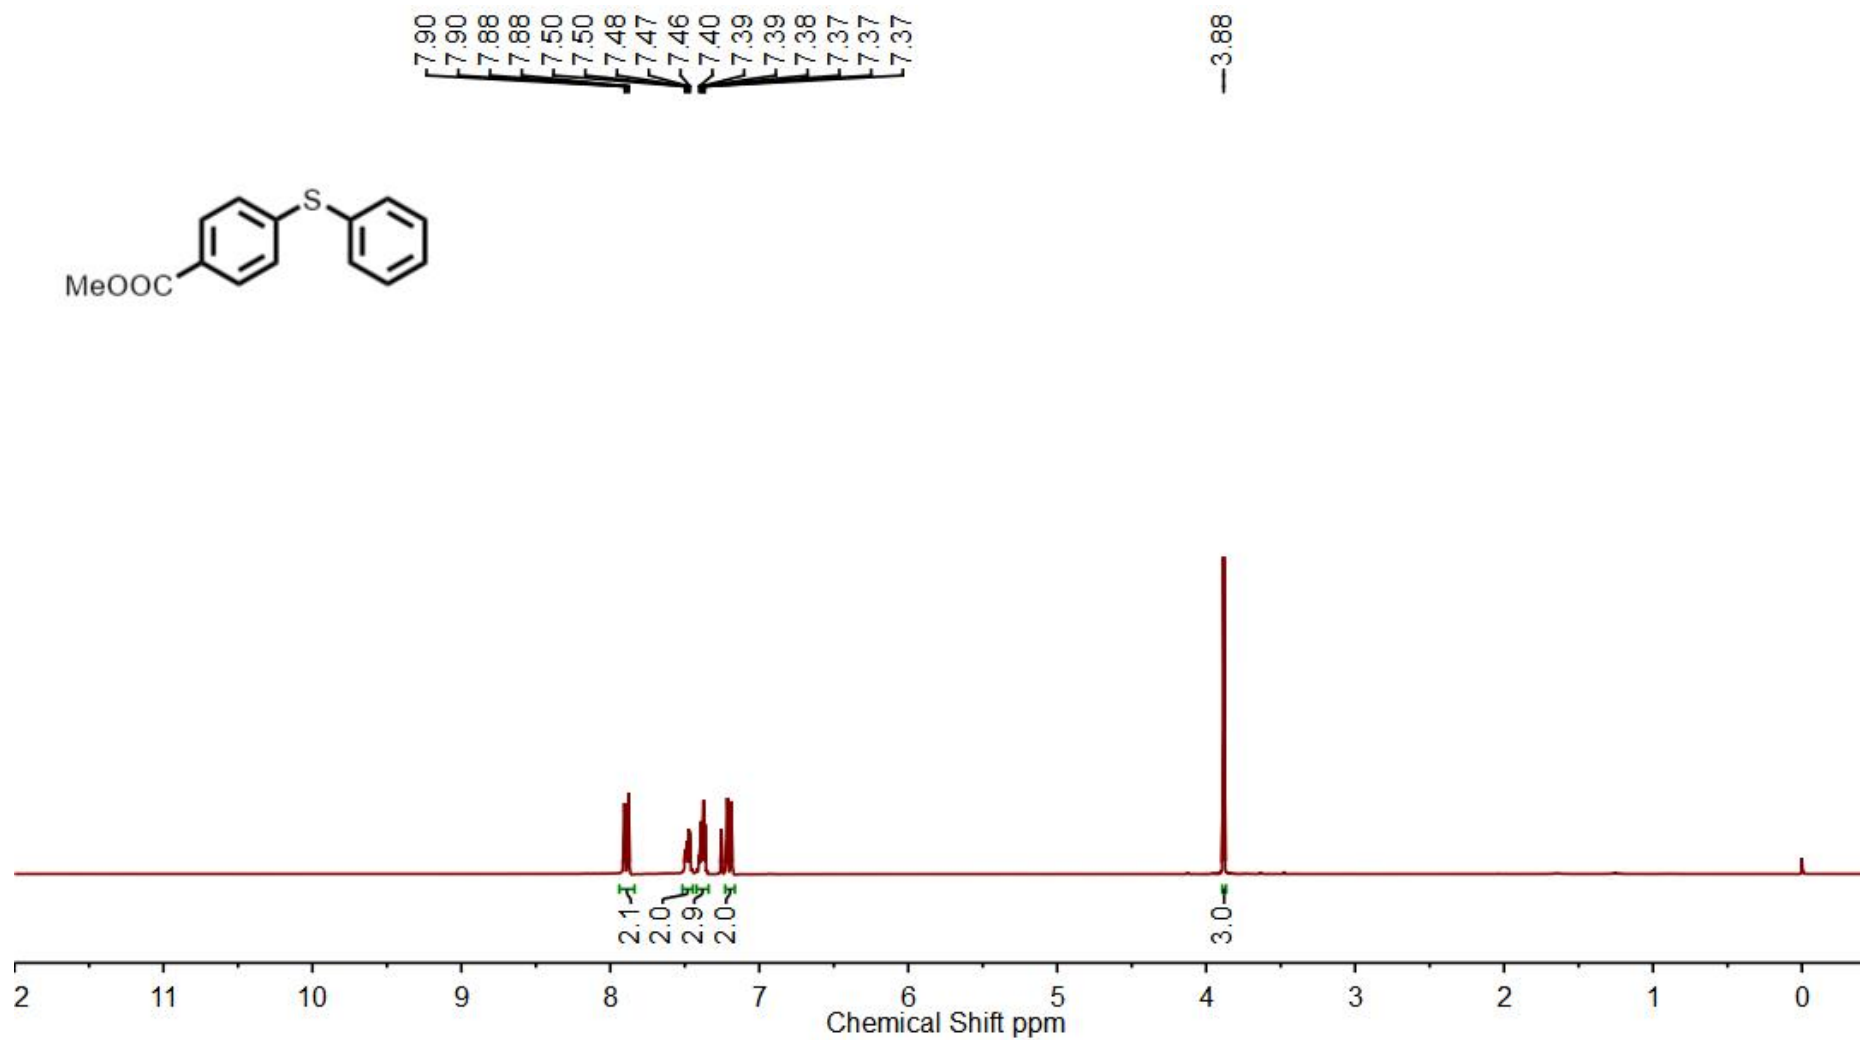

3j, CDCl<sub>3</sub>, <sup>13</sup>C NMR 75 MHz

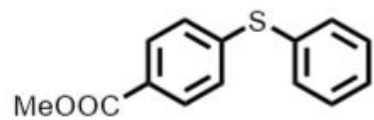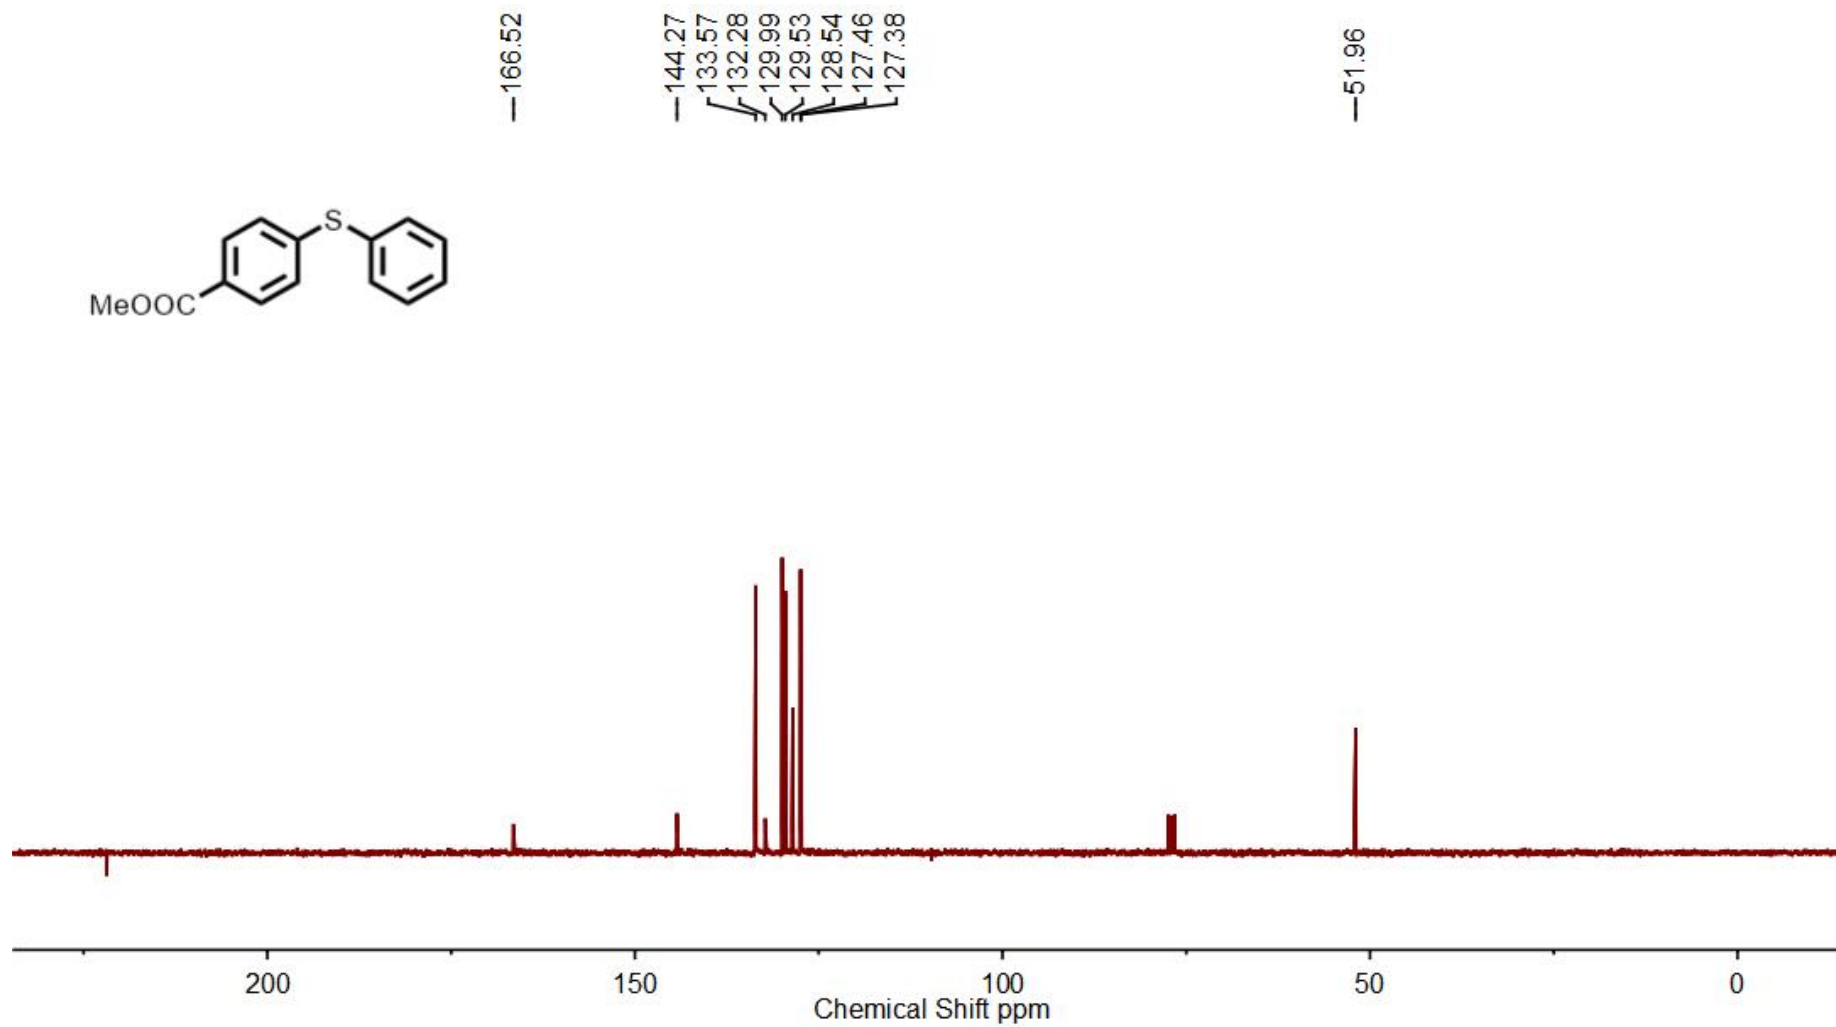

3k, CDCl<sub>3</sub>, <sup>1</sup>H NMR 300 MHz

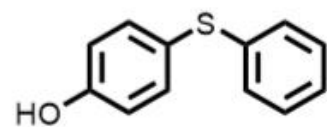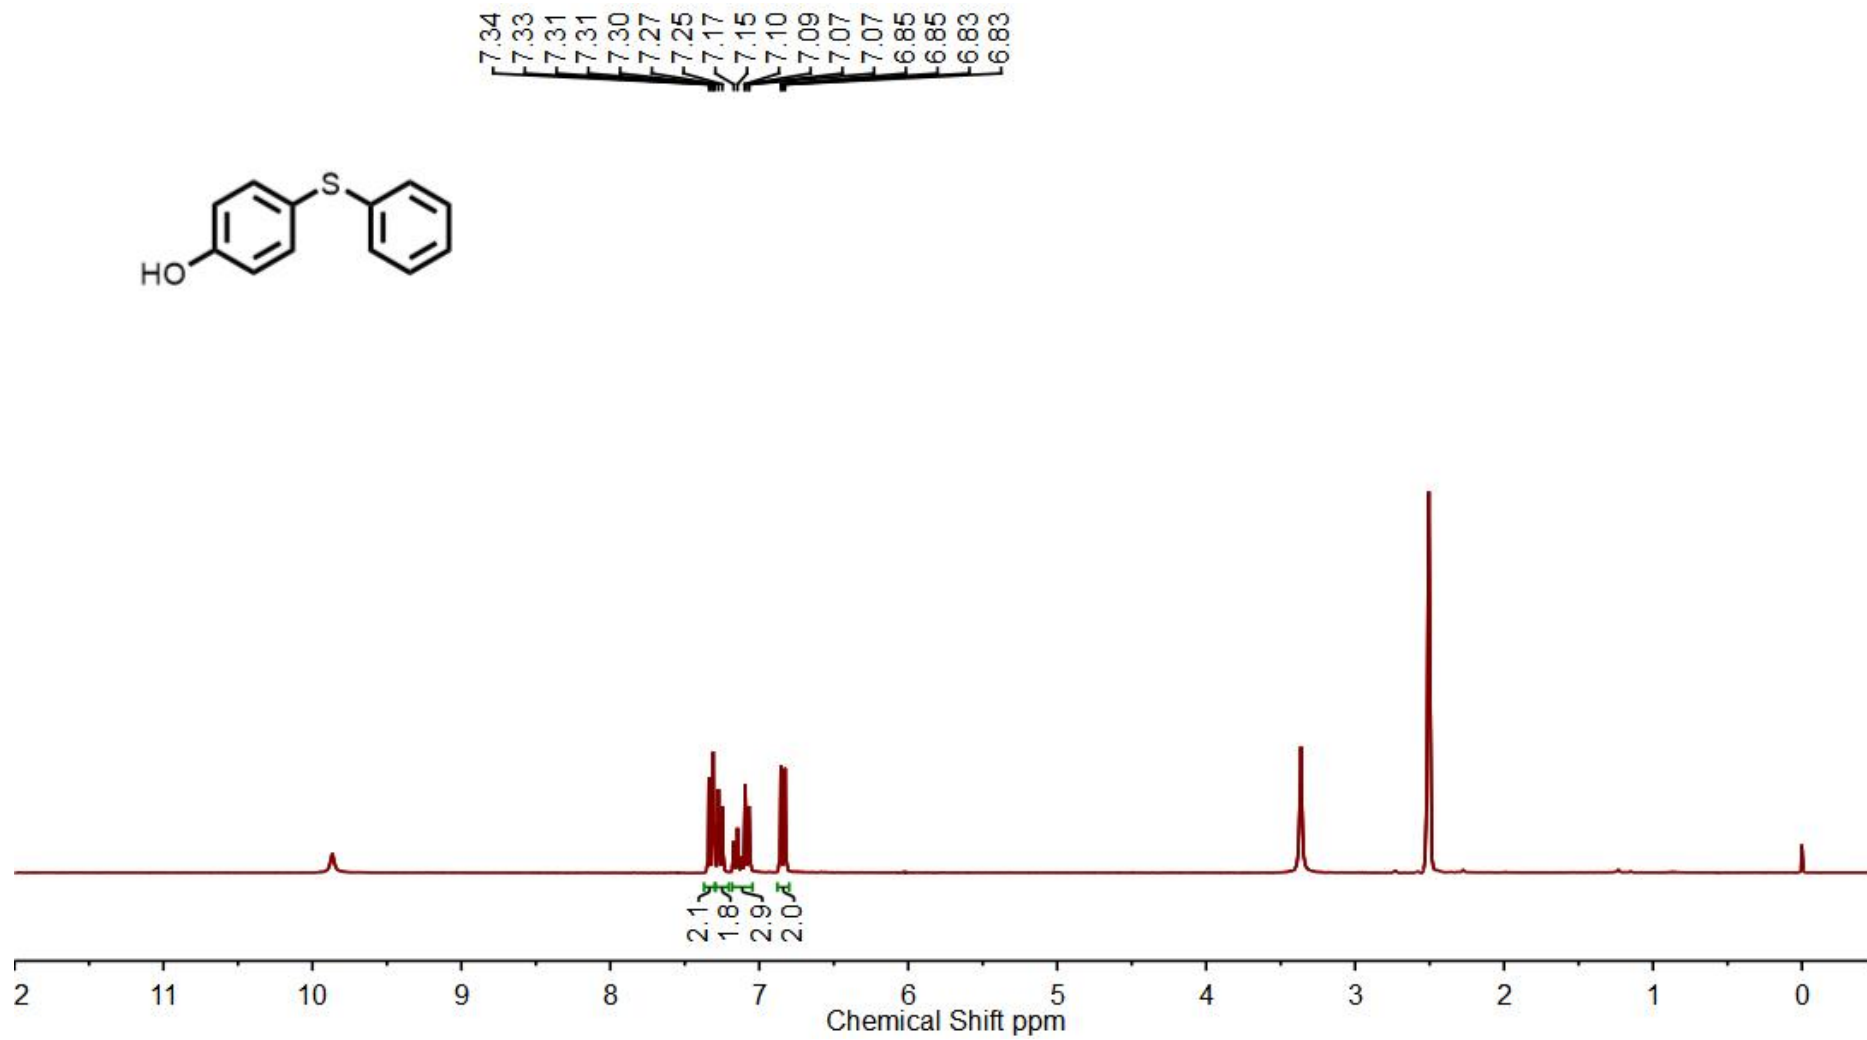



3k, CDCl<sub>3</sub>, <sup>13</sup>C NMR 75 MHz

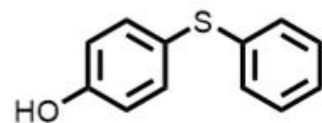

—158.39

~138.72

~136.07

~129.19

~127.14

~125.67

~120.44

~116.86

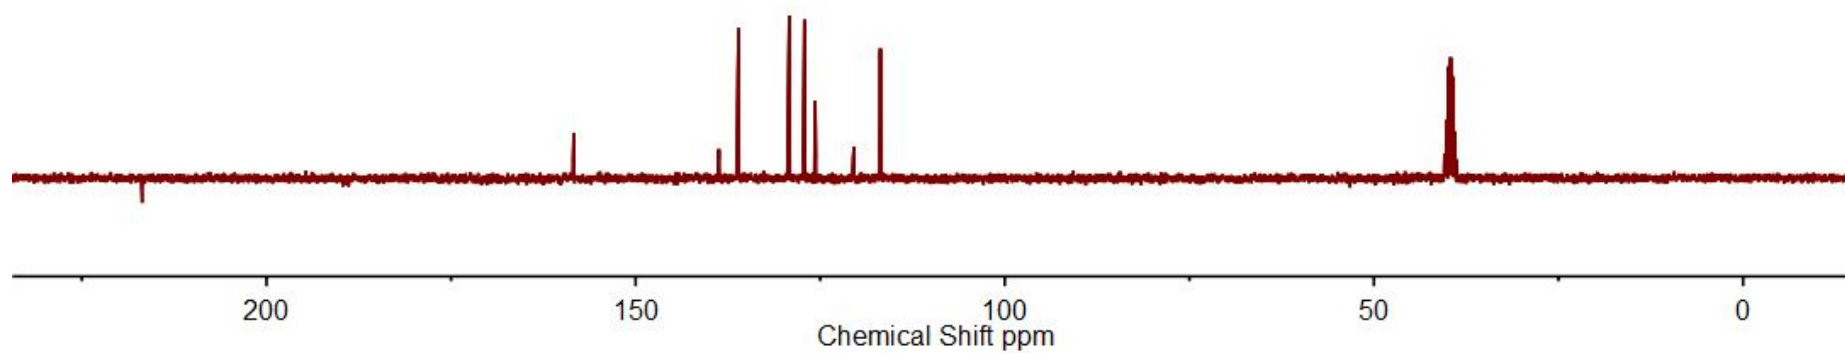

3l, DMSO-*d*<sub>6</sub>, <sup>1</sup>H NMR 300 MHz

7.88  
7.88  
7.86  
7.85  
7.73  
7.73  
7.72  
7.70  
7.70  
7.69  
7.51  
7.49  
7.48  
7.47  
7.46  
7.45  
7.27  
7.26  
7.24  
7.24

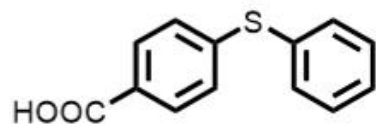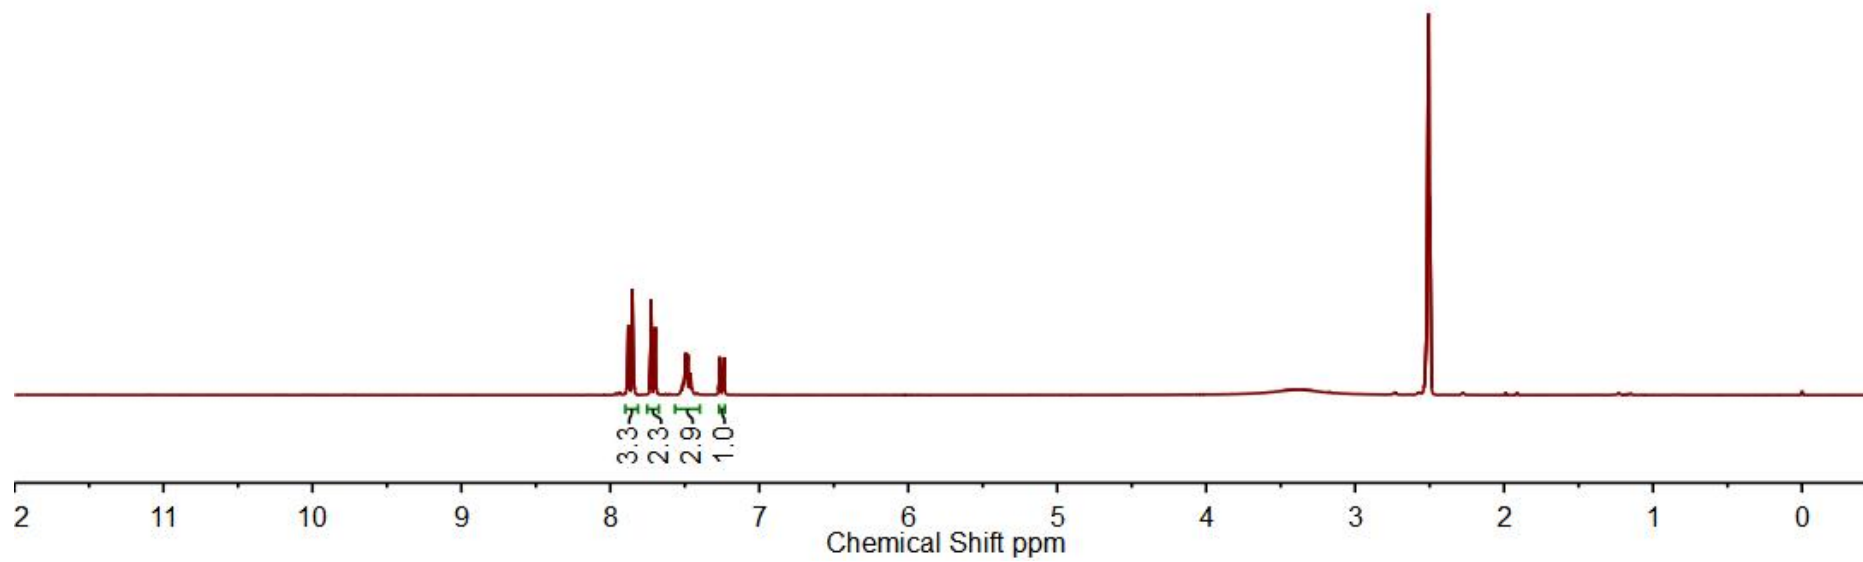

31, DMSO-*d*<sub>6</sub>, <sup>1</sup>H NMR 75 MHz

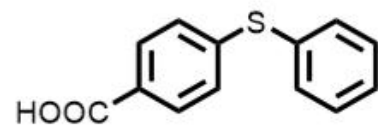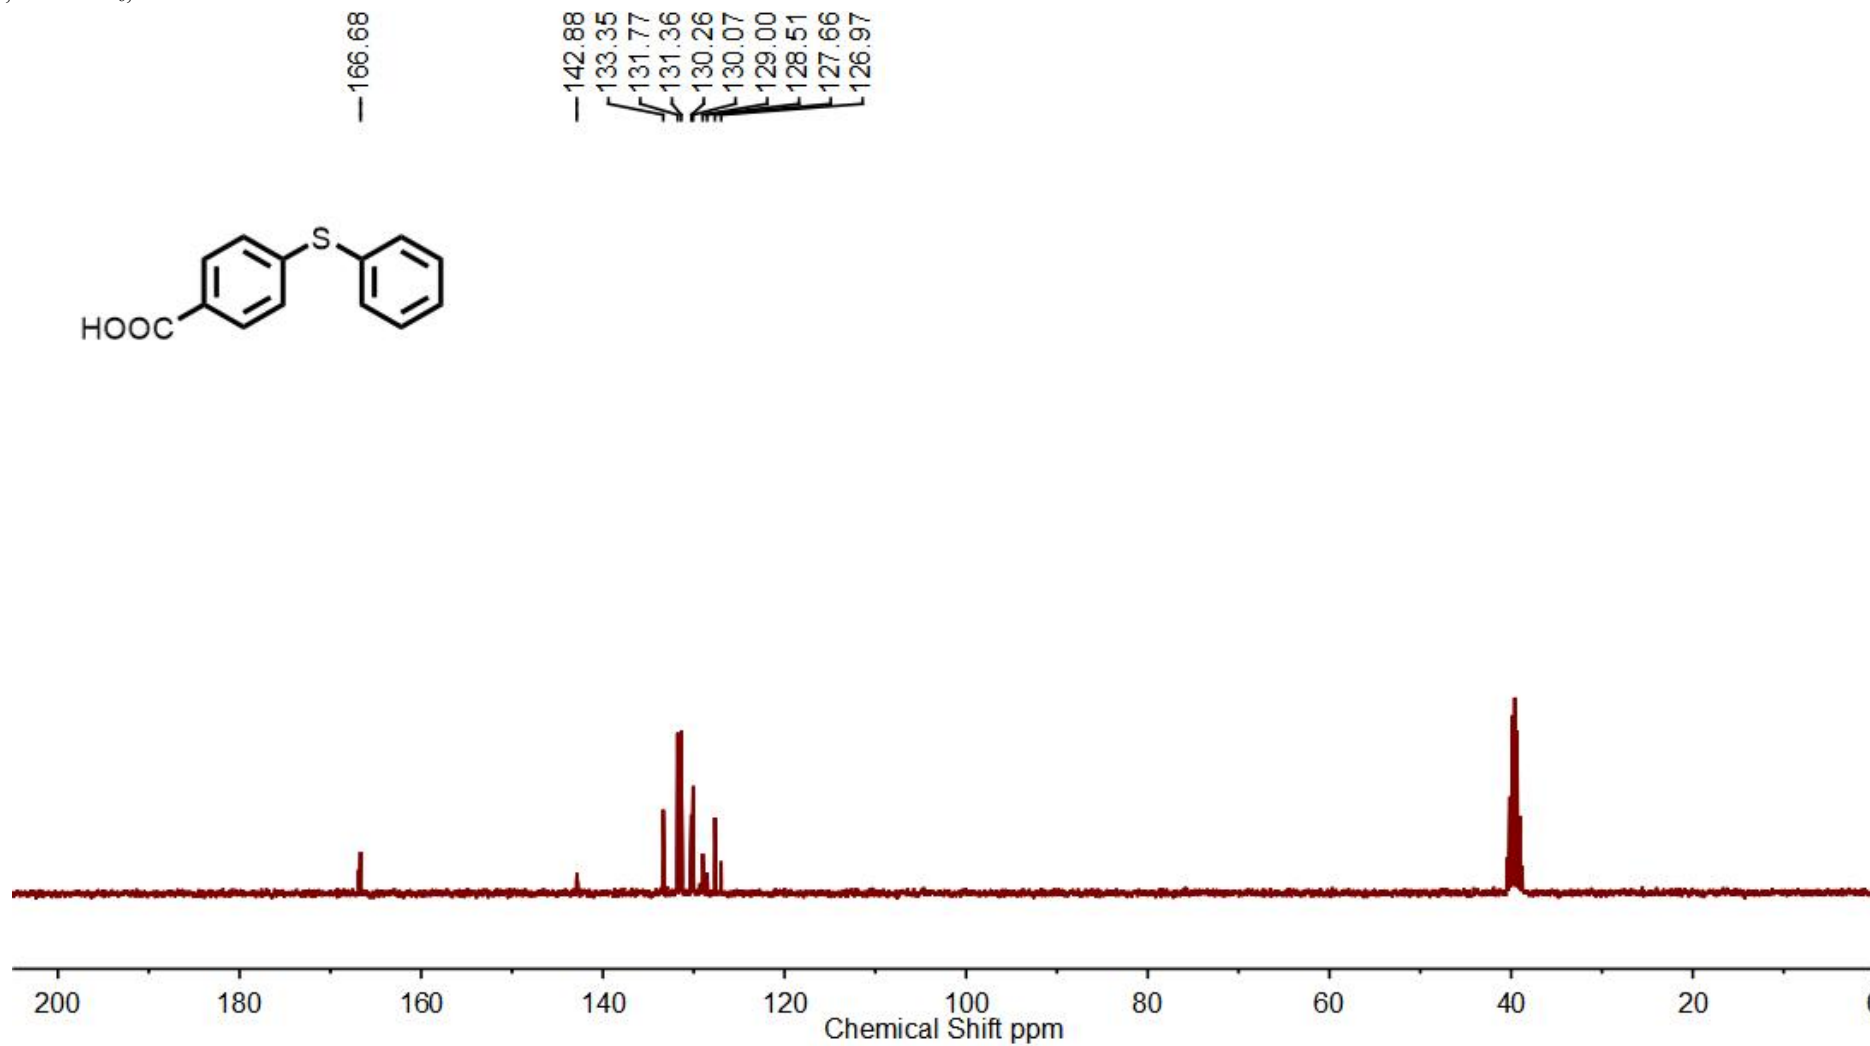

3m, CDCl<sub>3</sub>, <sup>1</sup>H NMR 300 MHz

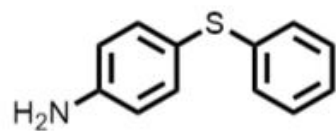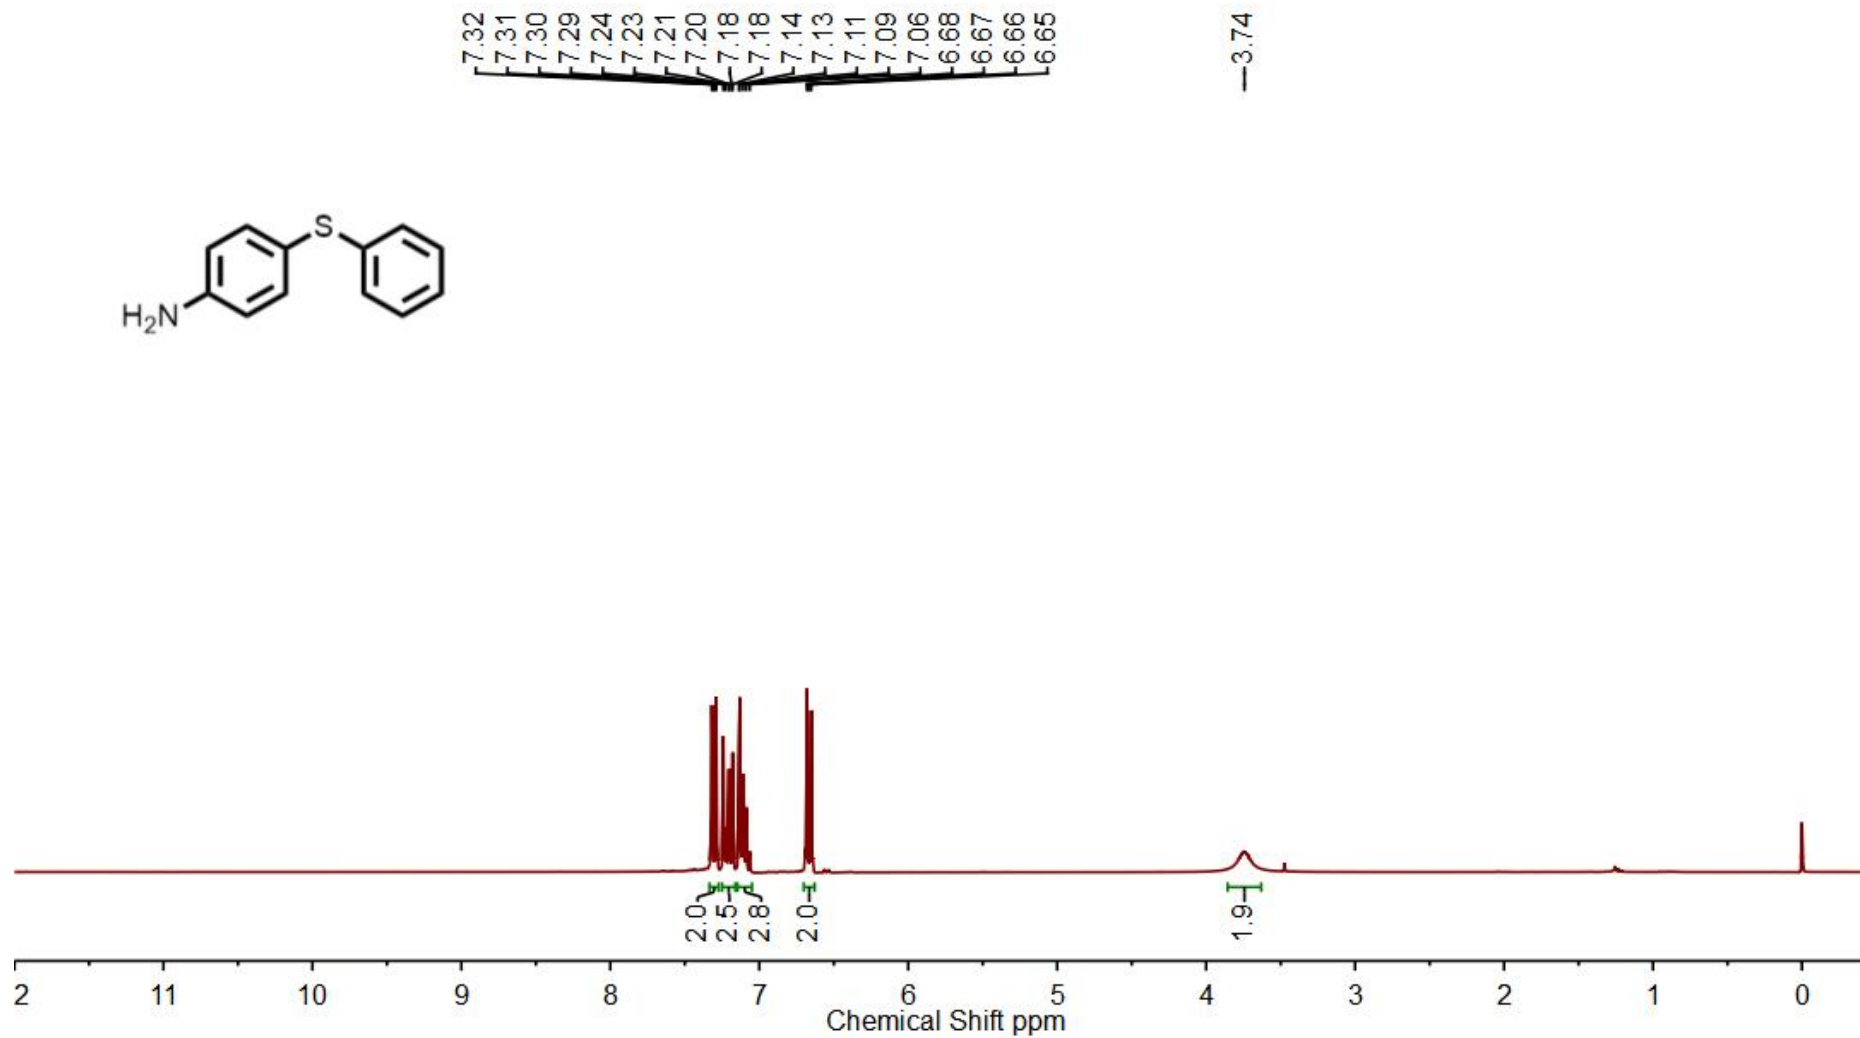

3m, CDCl<sub>3</sub>, <sup>13</sup>C NMR 75 MHz

— 146.86  
— 139.59  
— 136.02  
~ 128.75  
~ 127.25  
~ 125.20  
~ 120.50  
~ 115.86

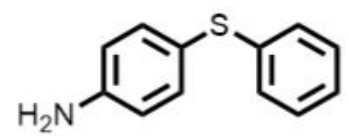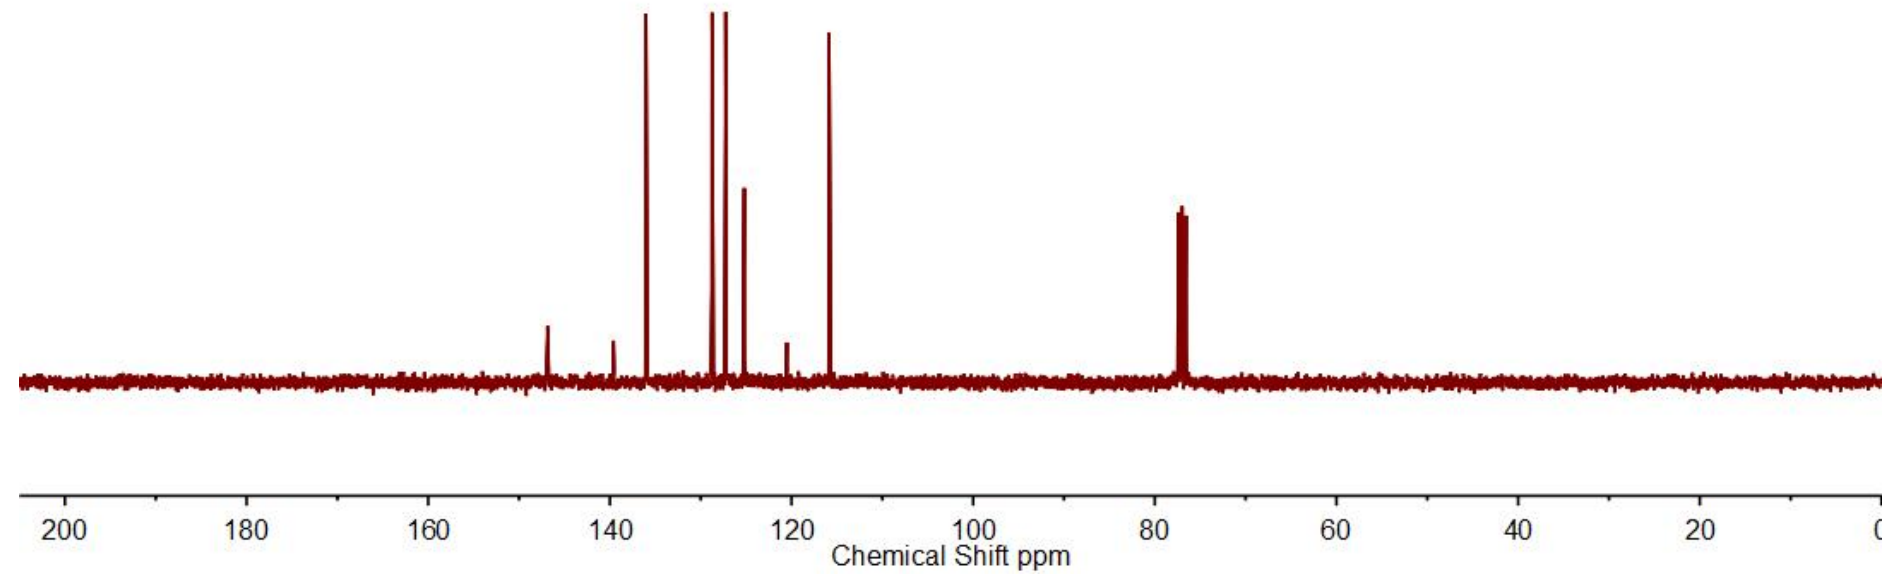

3n, DMSO-*d*<sub>6</sub>, <sup>1</sup>H NMR 400 MHz

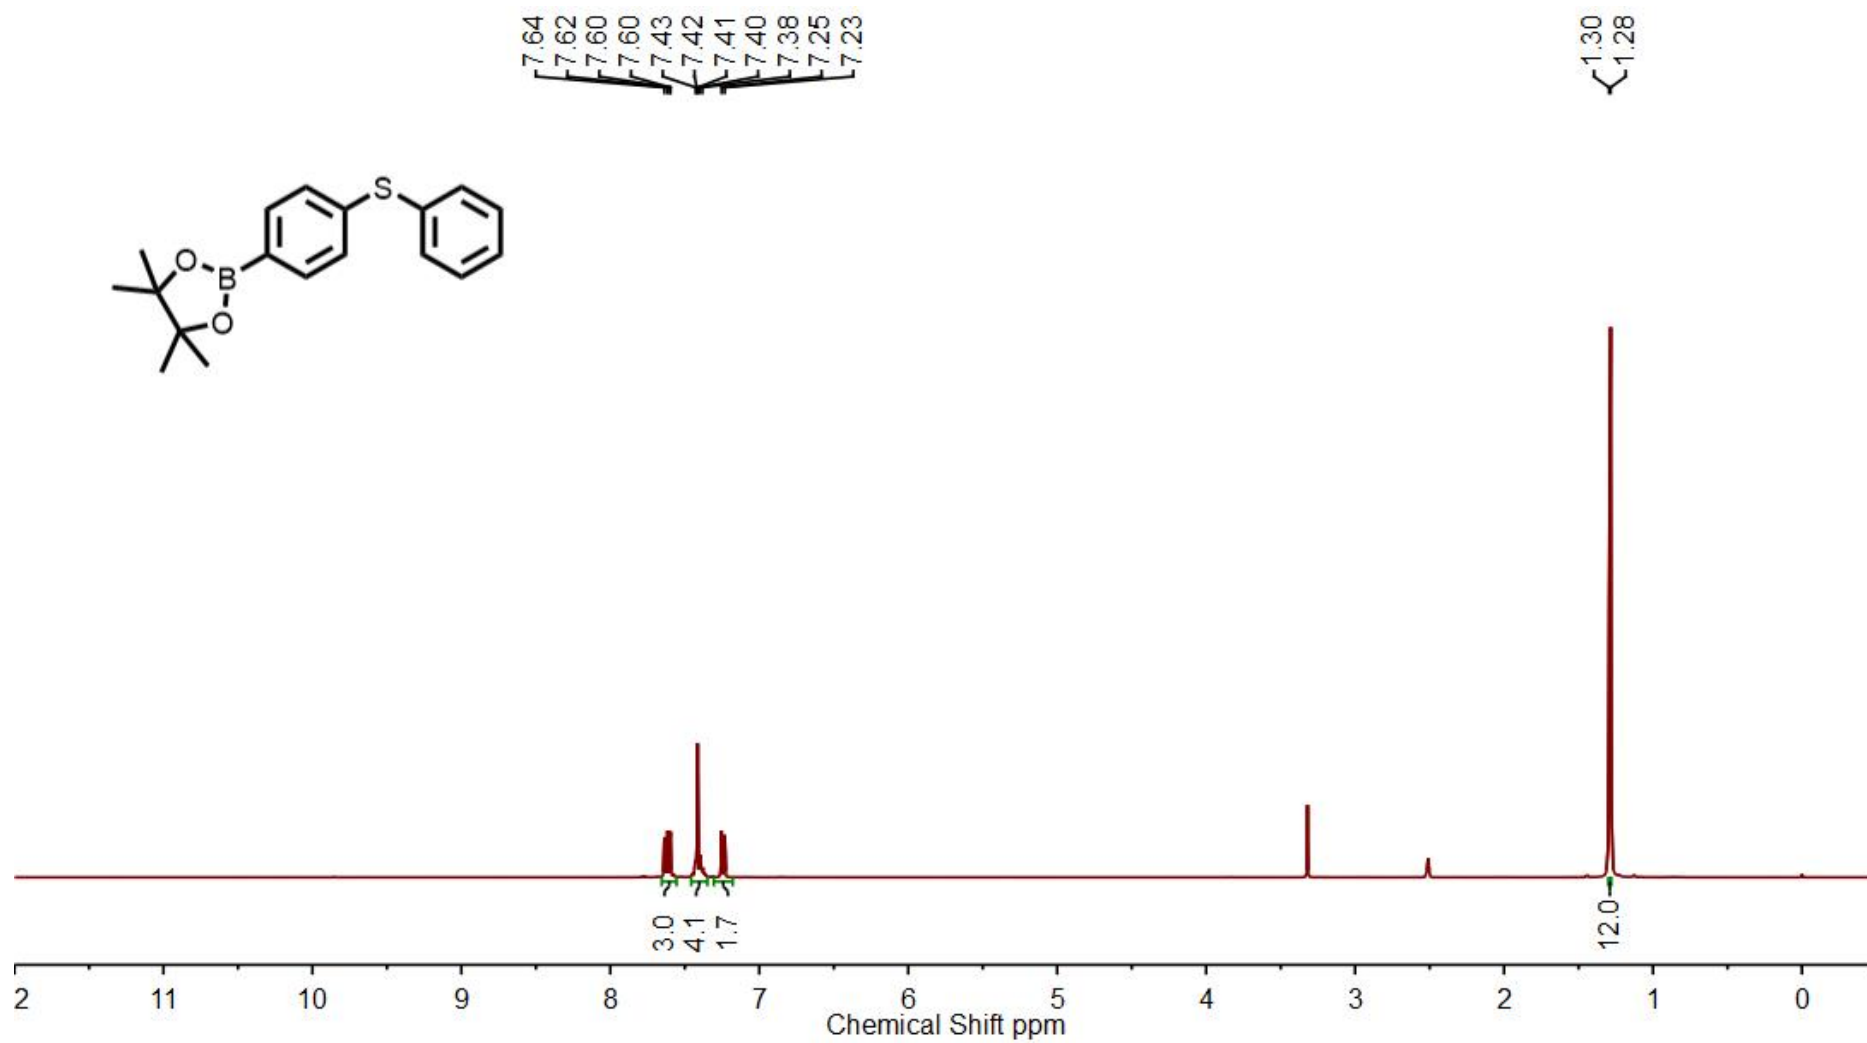

3n, DMSO-*d*<sub>6</sub>, <sup>13</sup>C NMR 101 MHz

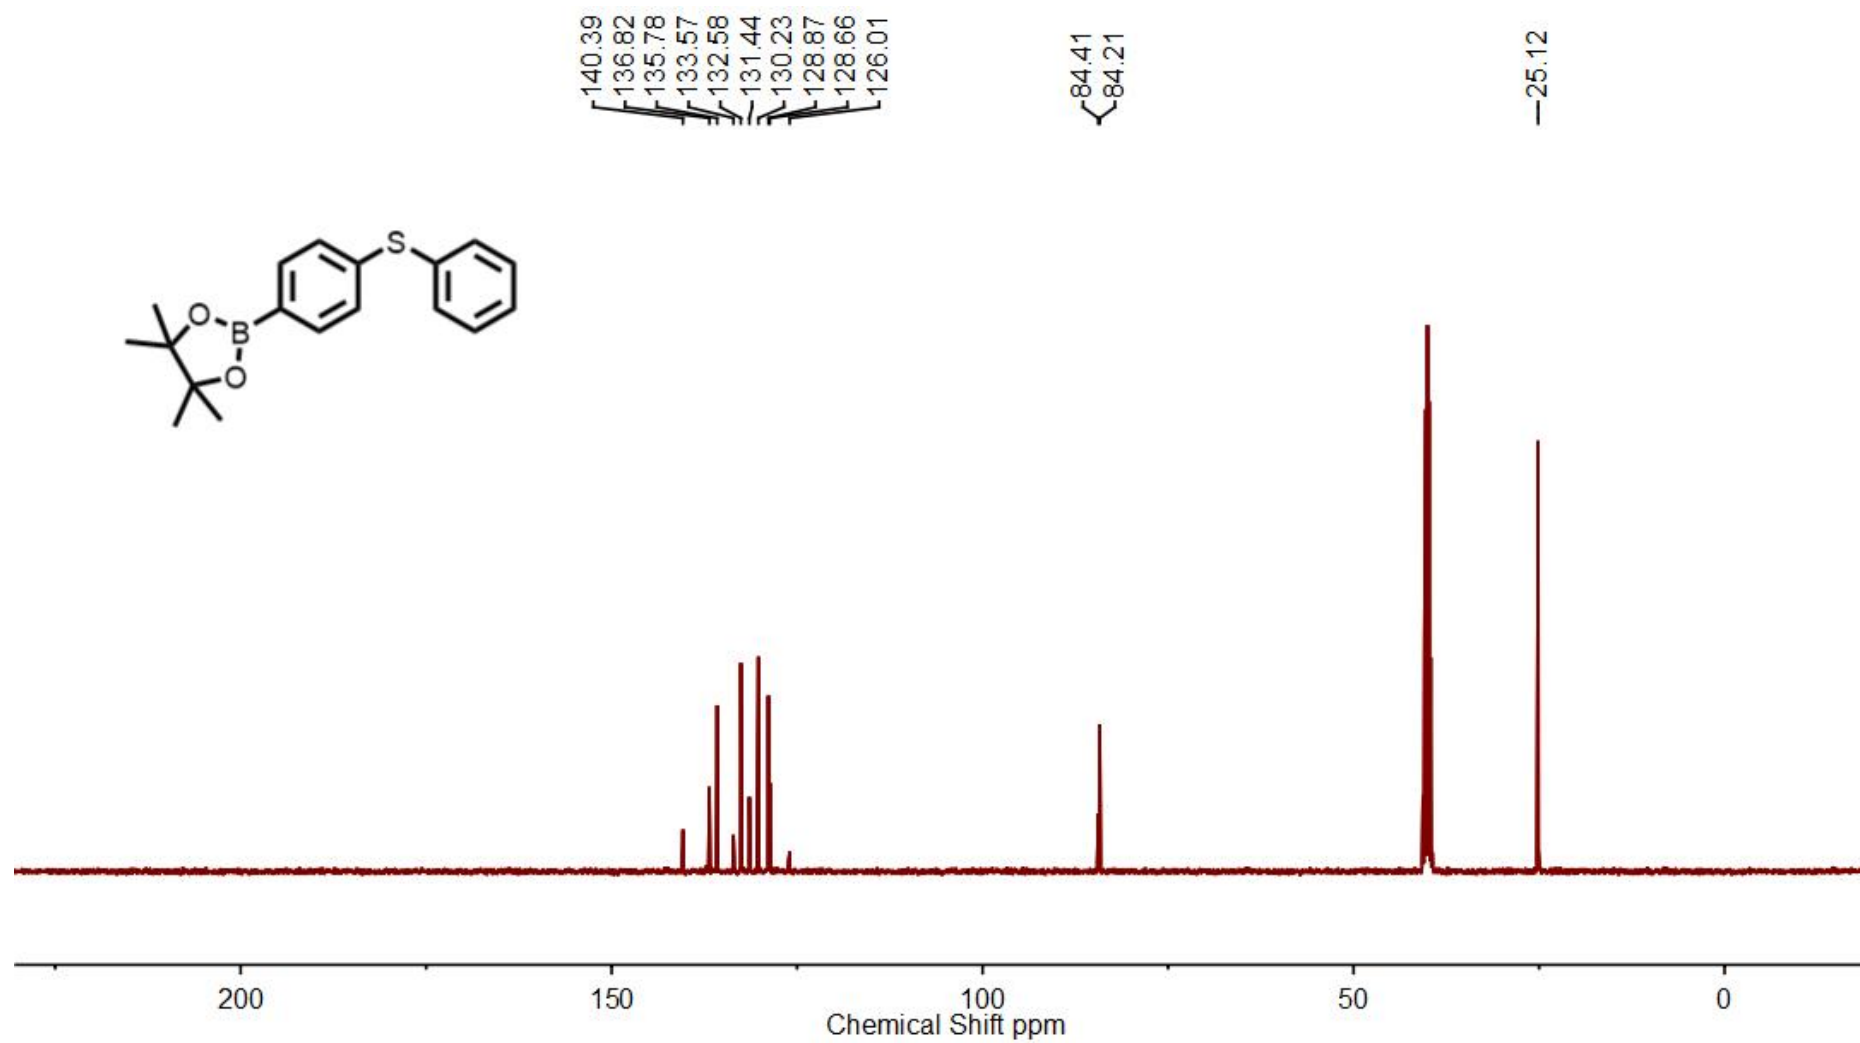

3o, CDCl<sub>3</sub>, <sup>1</sup>H NMR 300 MHz

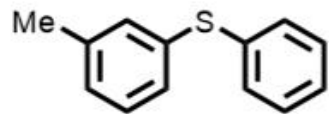

7.35  
7.34  
7.33  
7.32  
7.31  
7.29  
7.29  
7.28  
7.27  
7.26  
7.25  
7.25  
7.22  
7.20  
7.17  
7.16  
7.07  
7.05

-2.31

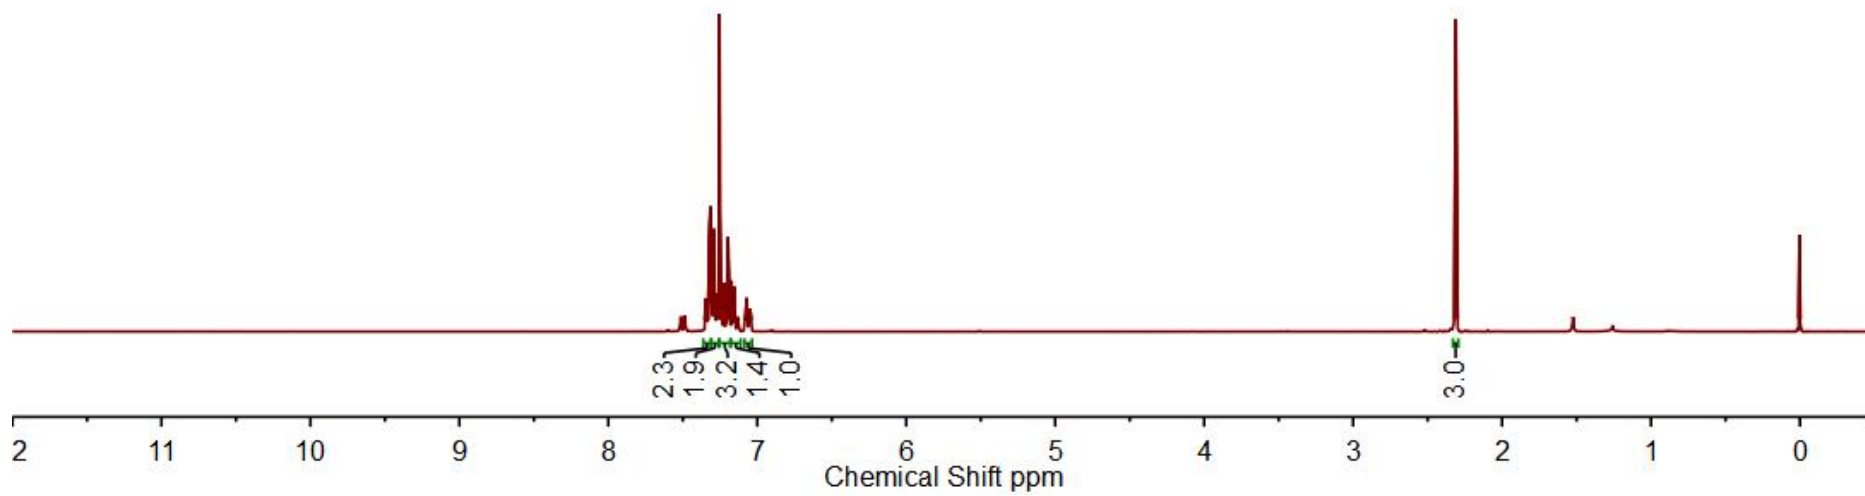



3o, CDCl<sub>3</sub>, <sup>13</sup>C NMR 75 MHz

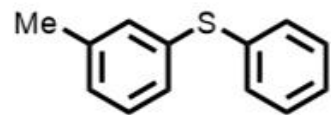

139.01  
136.06  
135.18  
131.80  
130.70  
129.08  
128.99  
128.29  
127.98  
126.80

-21.26

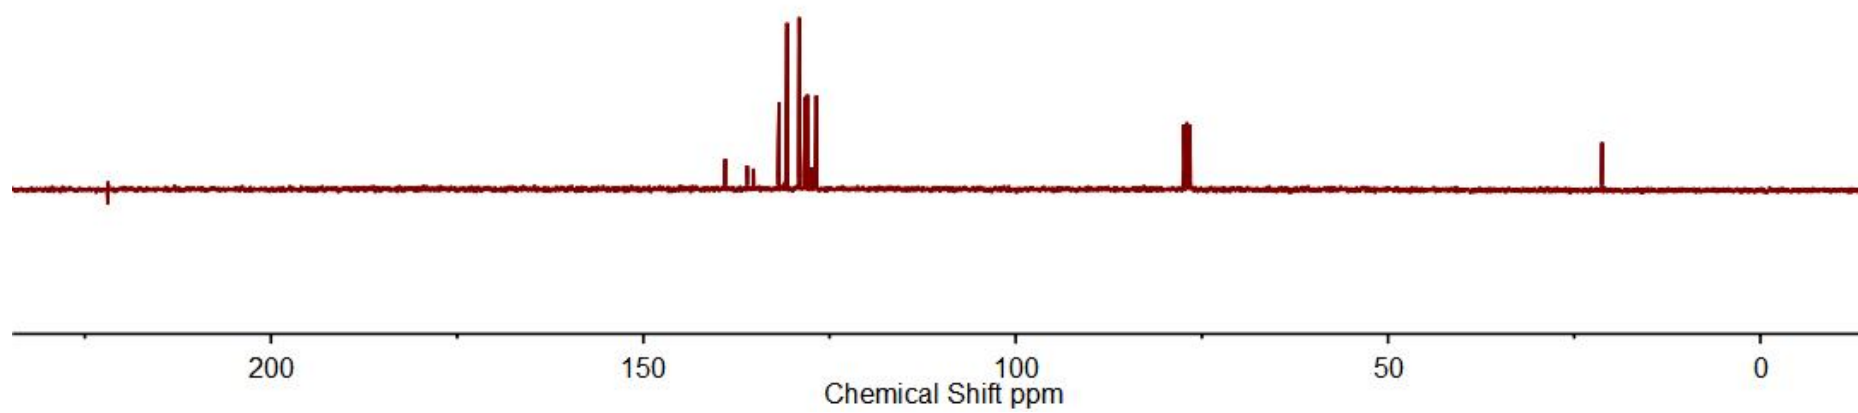

3p, CDCl<sub>3</sub>, <sup>1</sup>H NMR 300 MHz

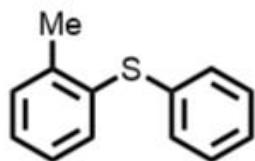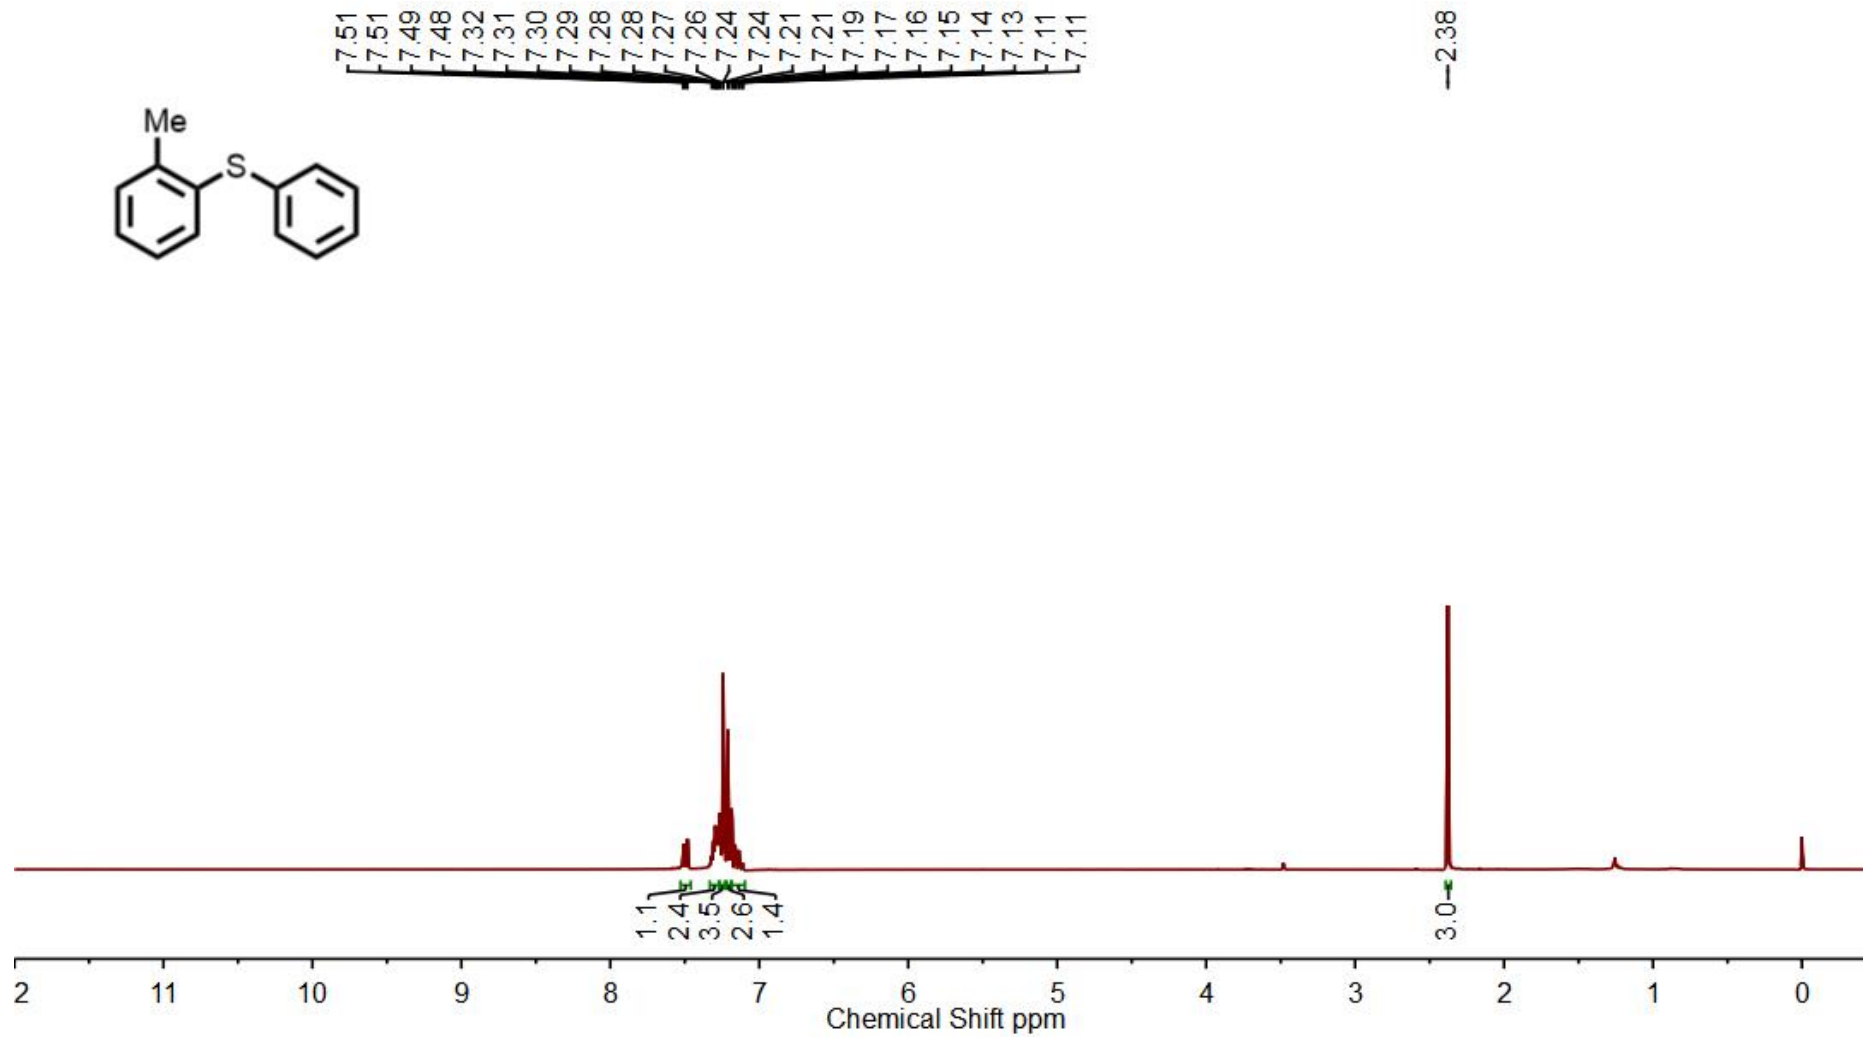

3p, CDCl<sub>3</sub>, <sup>13</sup>C NMR 75 MHz

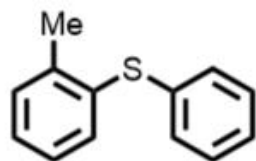

139.95  
136.12  
132.97  
130.56  
129.60  
129.09  
129.03  
127.87  
127.48  
127.12  
126.68  
126.30

—20.52

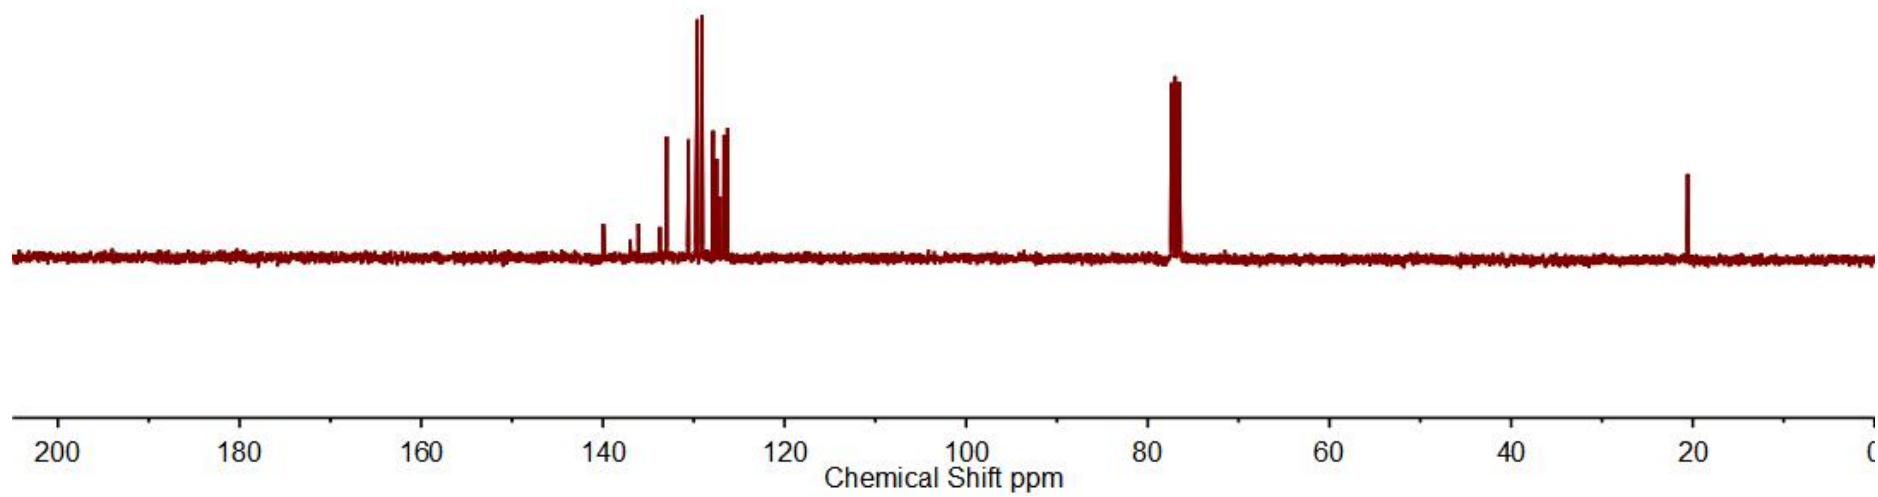

3q, CDCl<sub>3</sub>, <sup>1</sup>H NMR 300 MHz

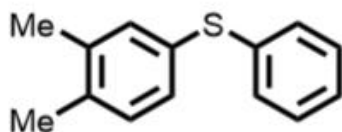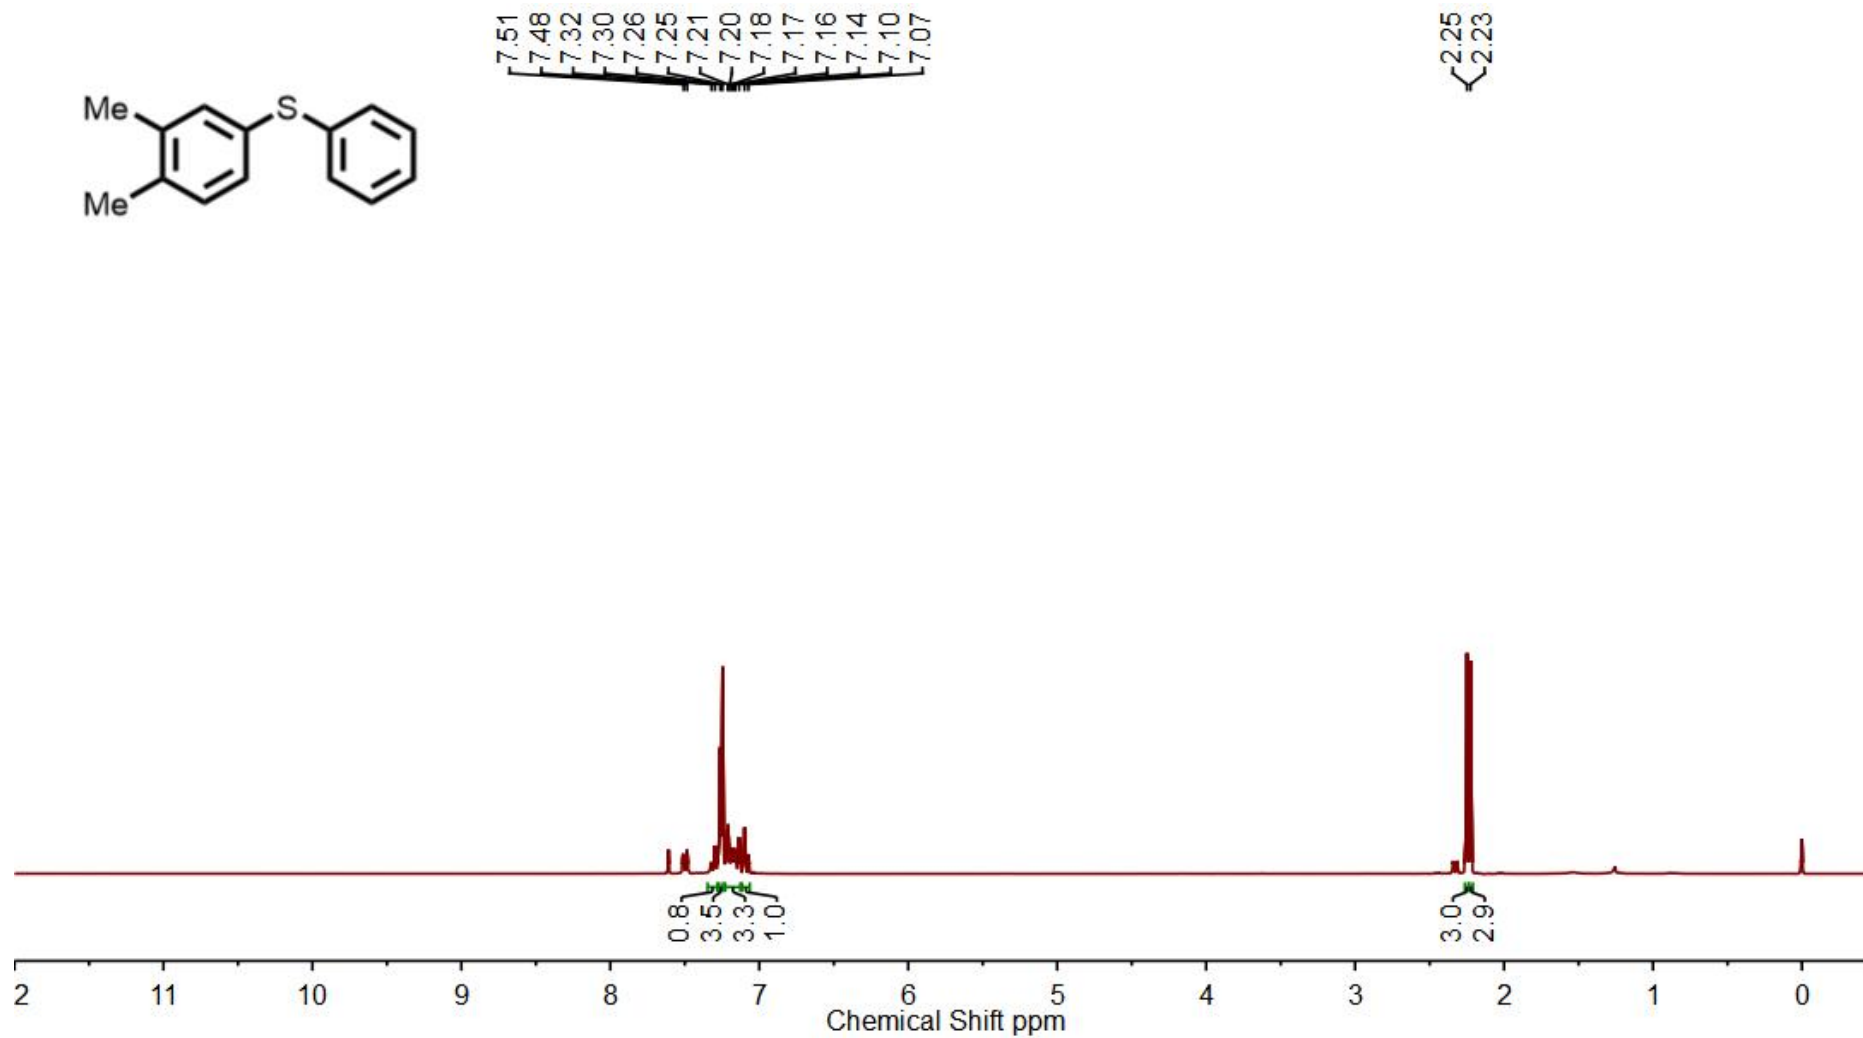

3q, CDCl<sub>3</sub>, <sup>13</sup>C NMR 75 MHz

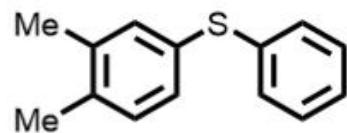

137.72  
137.32  
136.37  
133.52  
130.51  
129.93  
129.55  
129.03  
128.95  
127.49  
127.12  
126.21

19.66  
19.43

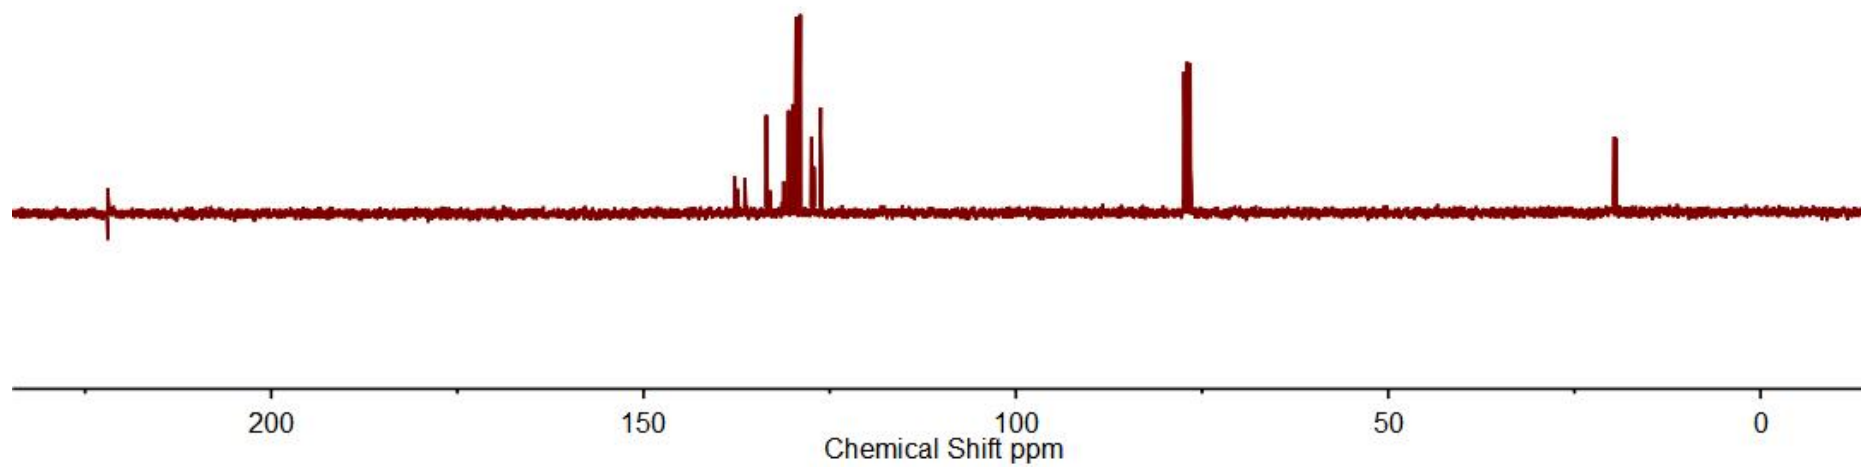

3r, CDCl<sub>3</sub>, <sup>13</sup>C NMR 300 MHz

7.40  
7.39  
7.39  
7.39  
7.39  
7.37  
7.37  
7.36  
7.36  
7.30  
7.30  
7.28  
7.27  
7.27  
7.25  
7.24  
7.22  
7.22  
7.21  
7.20  
7.18  
7.16  
7.07  
7.07  
7.06  
7.05

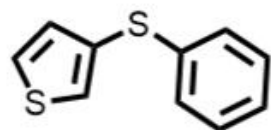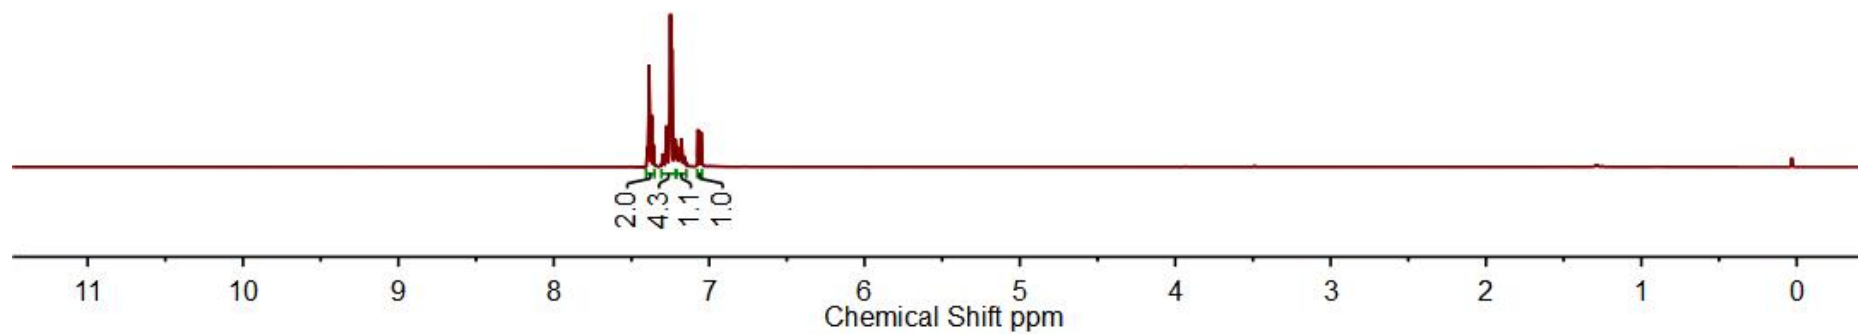

3r, CDCl<sub>3</sub>, <sup>13</sup>C NMR 75 MHz

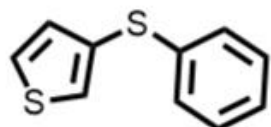

137.28  
131.17  
129.28  
128.94  
128.36  
128.13  
126.68  
126.07

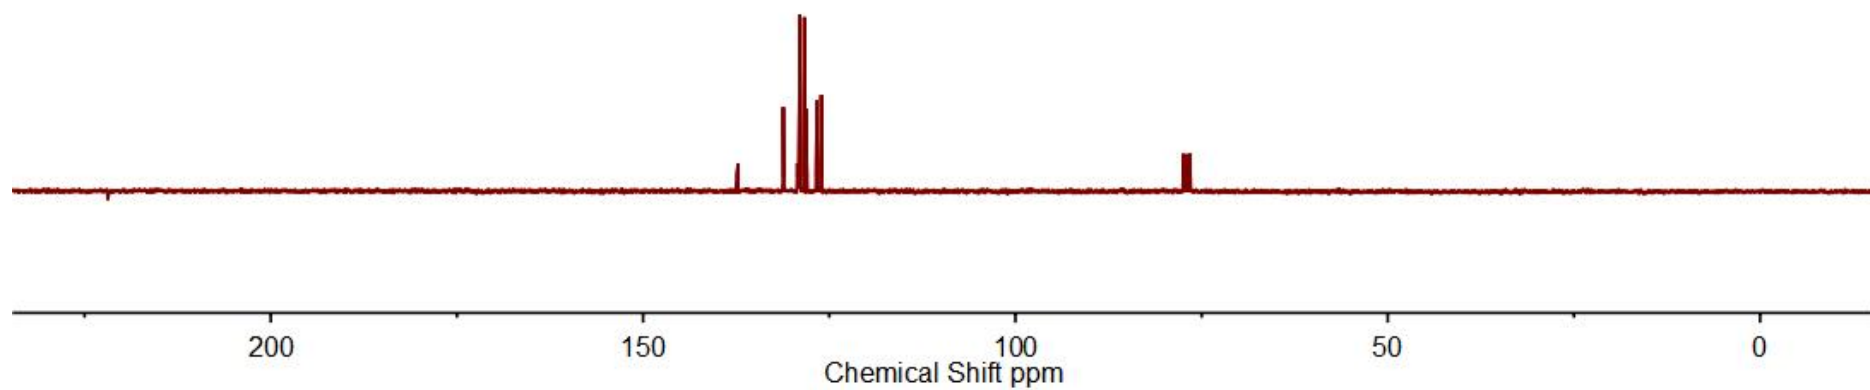

3s, CDCl<sub>3</sub>, <sup>1</sup>H NMR 300 MHz

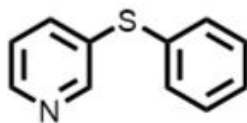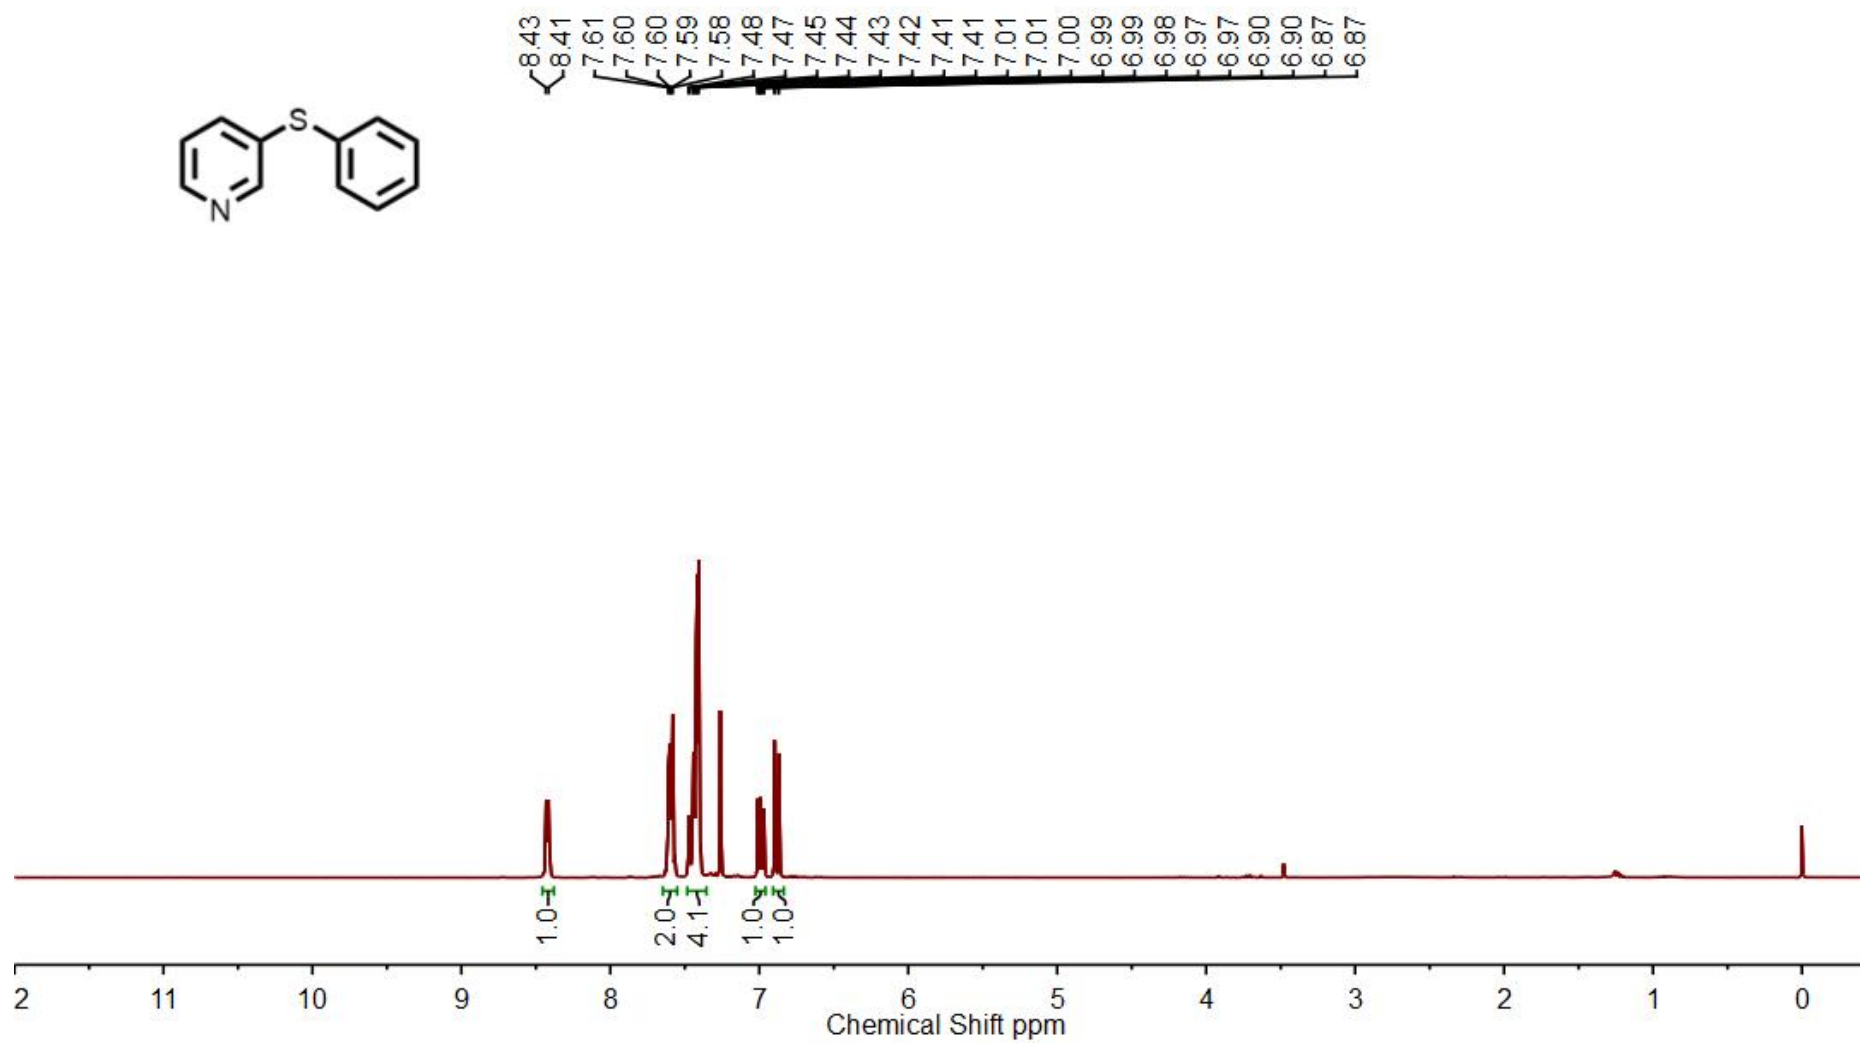



3s, CDCl<sub>3</sub>, <sup>13</sup>C NMR 75 MHz

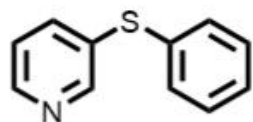

—161.46

—149.45

136.68

134.89

130.95

129.57

129.04

121.30

119.82

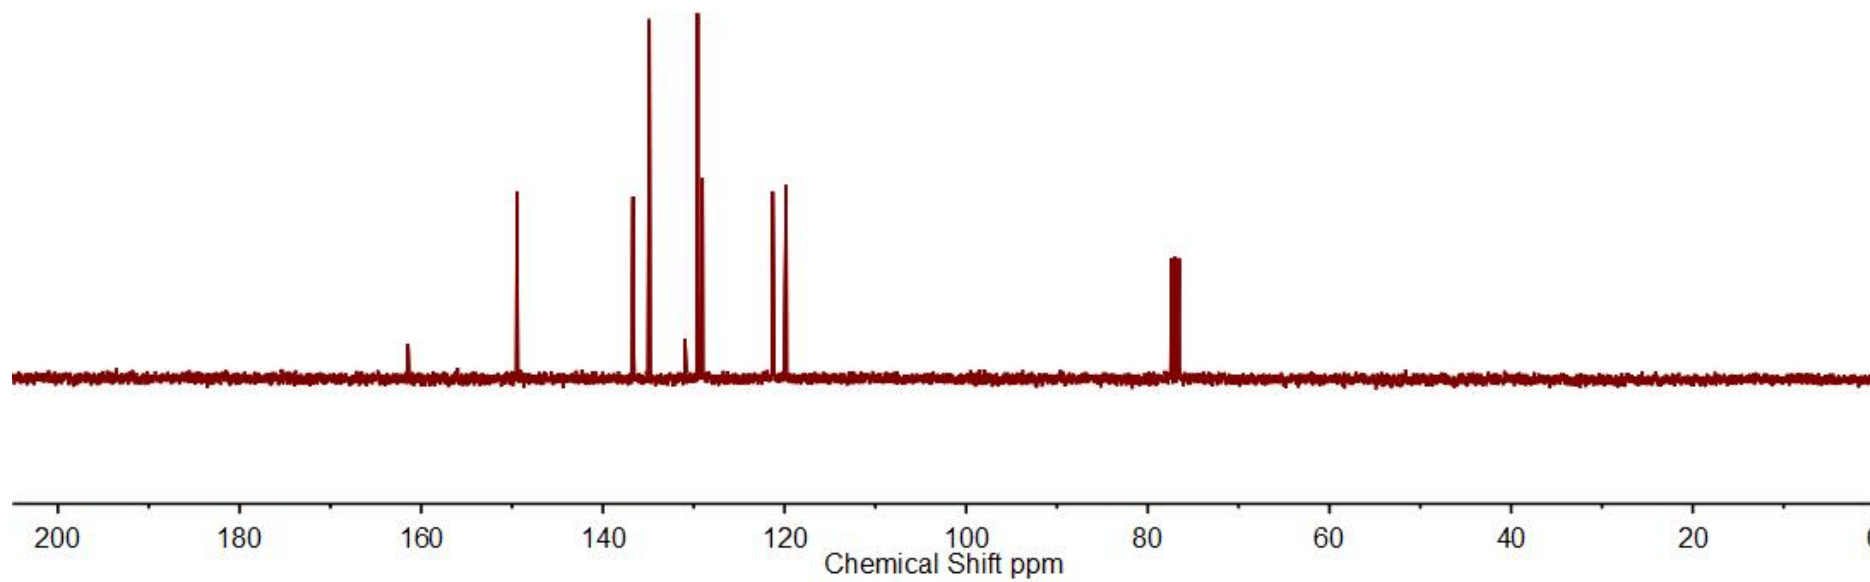

3t, DMSO-*d*<sub>6</sub>, <sup>1</sup>H NMR 400 MHz

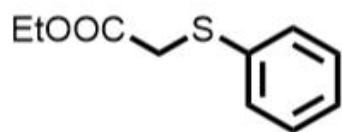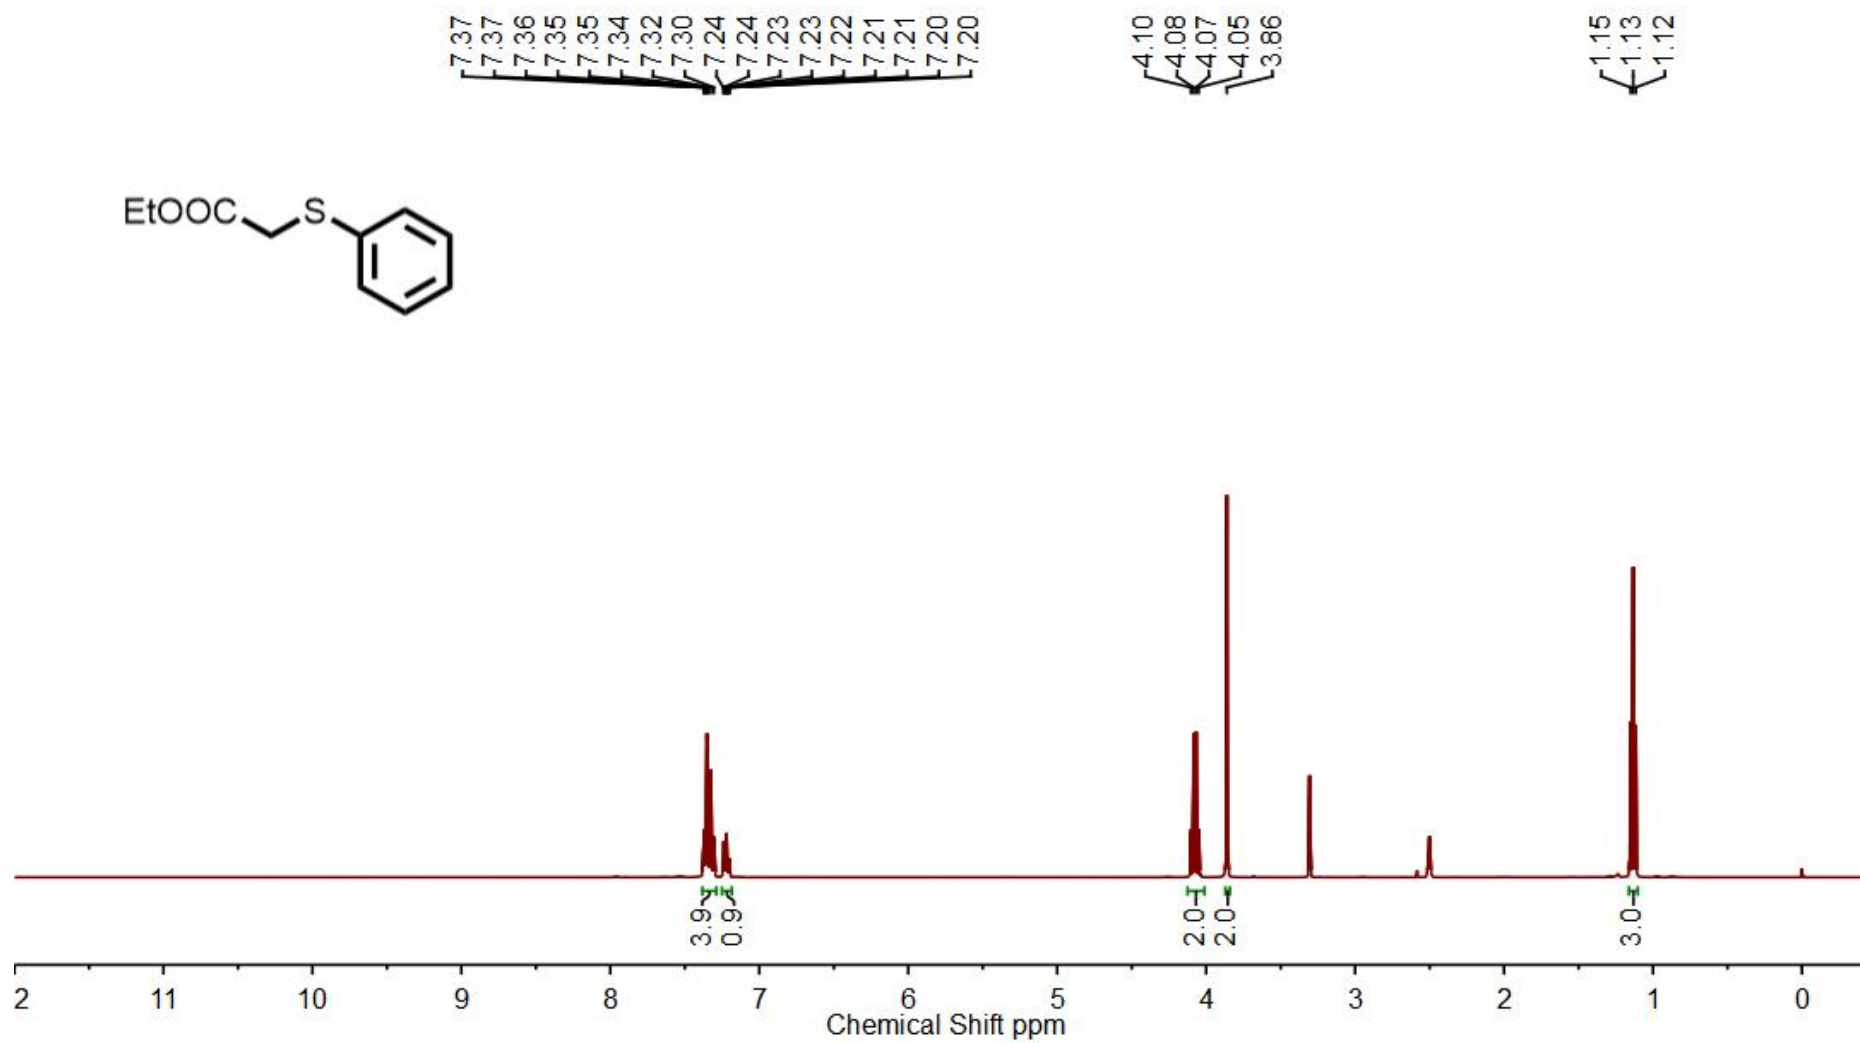

3t, DMSO-*d*<sub>6</sub>, <sup>13</sup>C NMR 101 MHz

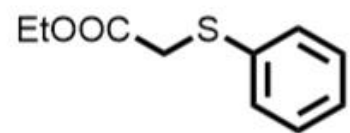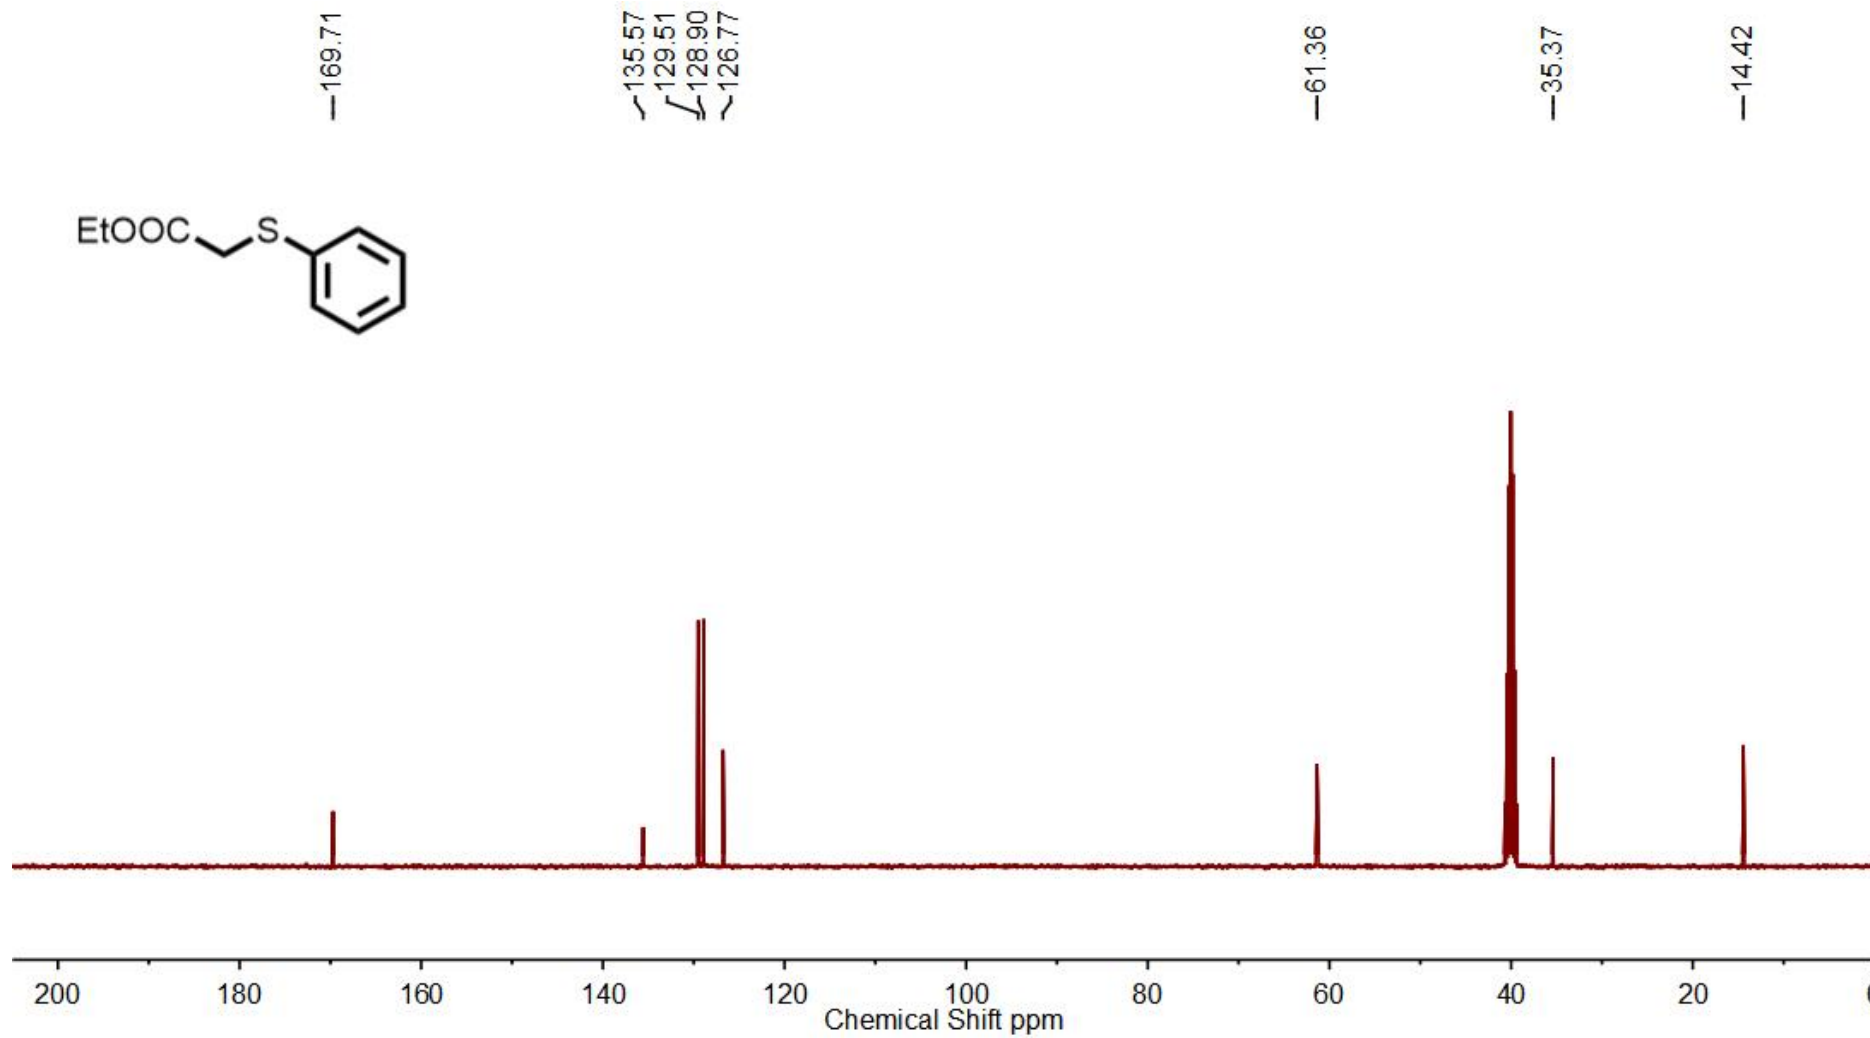

3u, DMSO-*d*<sub>6</sub>, <sup>1</sup>H NMR 300 MHz

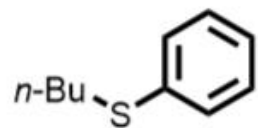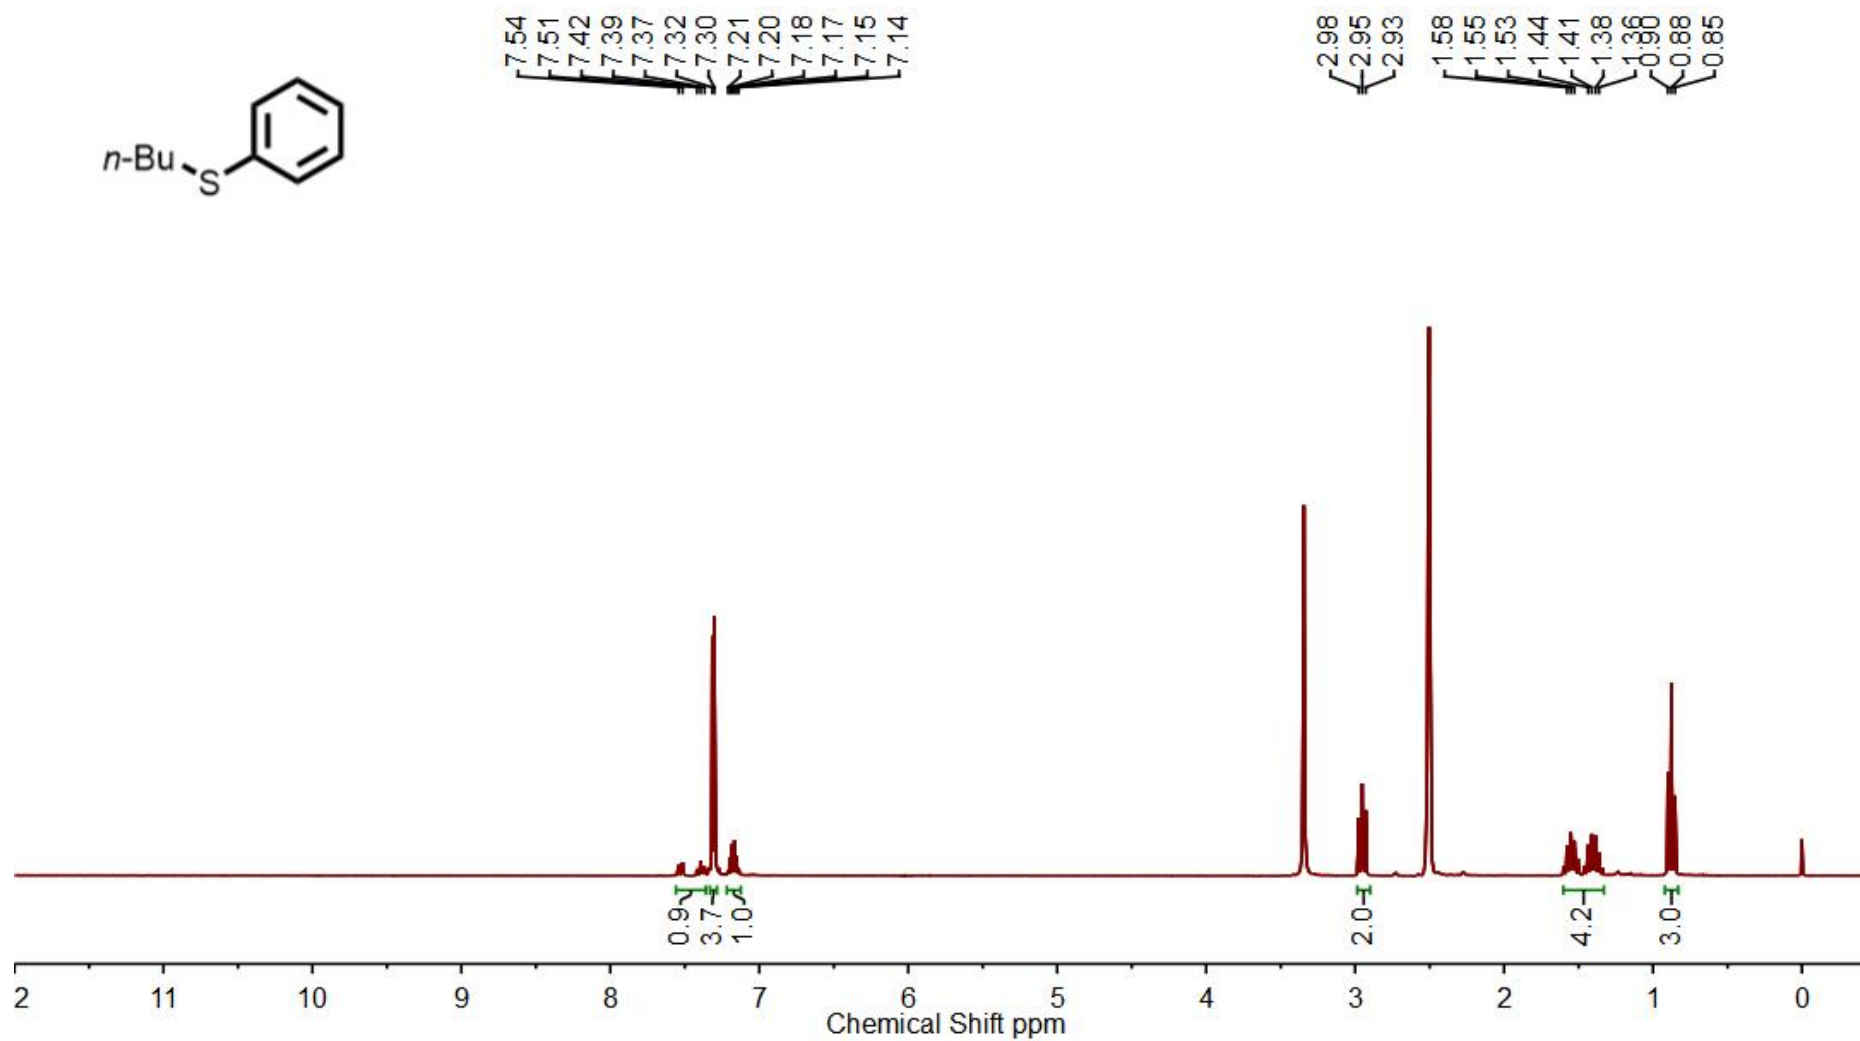

3u, DMSO-*d*<sub>6</sub>, <sup>13</sup>C NMR 75 MHz

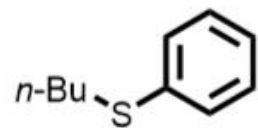

— 136.58  
— 129.04  
— 127.95  
— 125.48

— 31.70  
— 30.72  
— 21.34  
— 13.54

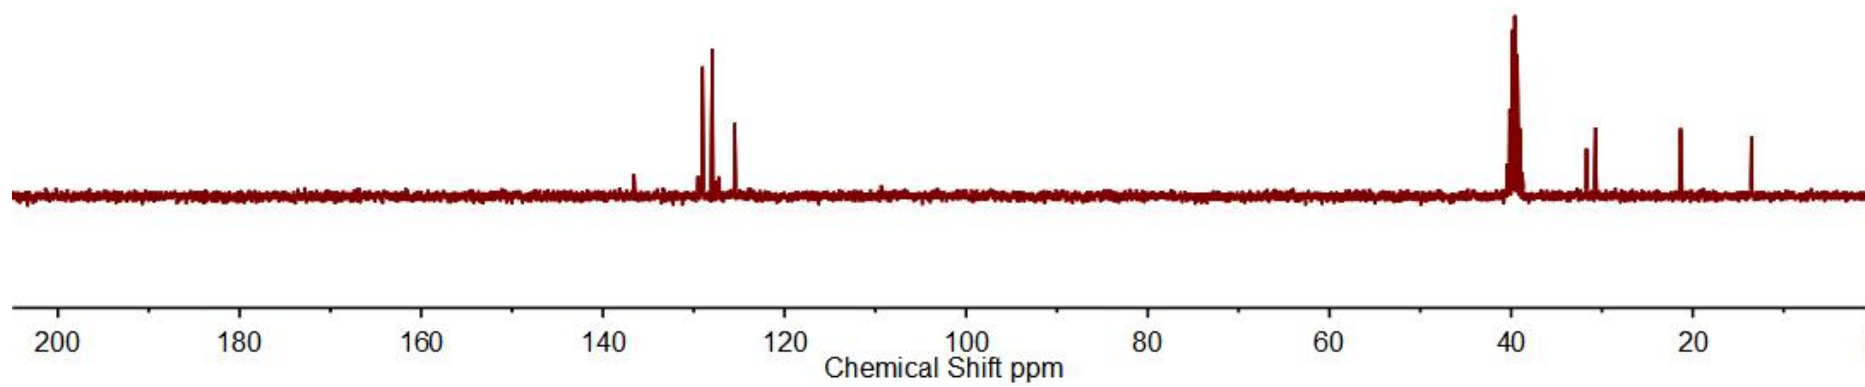

4b, DMSO-*d*<sub>6</sub>, <sup>1</sup>H NMR 400 MHz

7.35  
7.34  
7.33  
7.32  
7.32  
7.30  
7.29  
7.28  
7.28  
7.26  
7.25  
7.24  
7.22  
7.20

—2.31

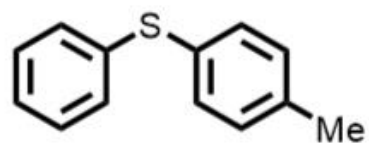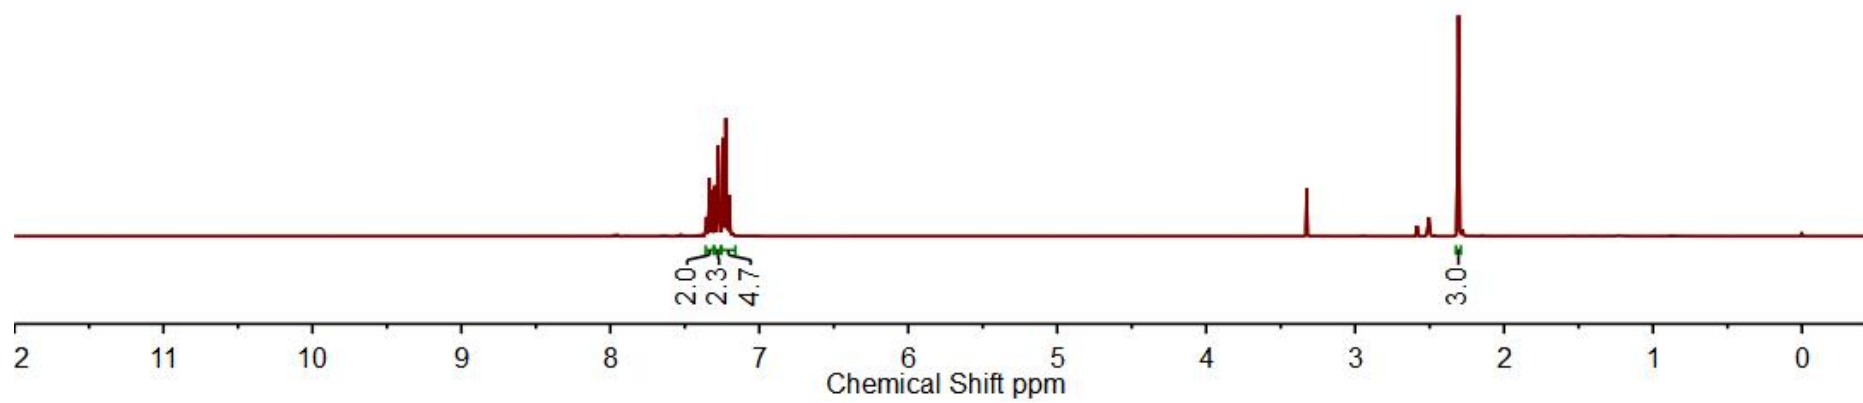

4b, DMSO-*d*<sub>6</sub>, <sup>13</sup>C NMR 101 MHz

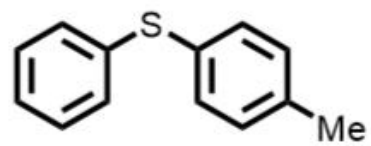

138.08  
136.66  
132.49  
130.83  
130.76  
129.90  
129.86  
127.22

-21.12

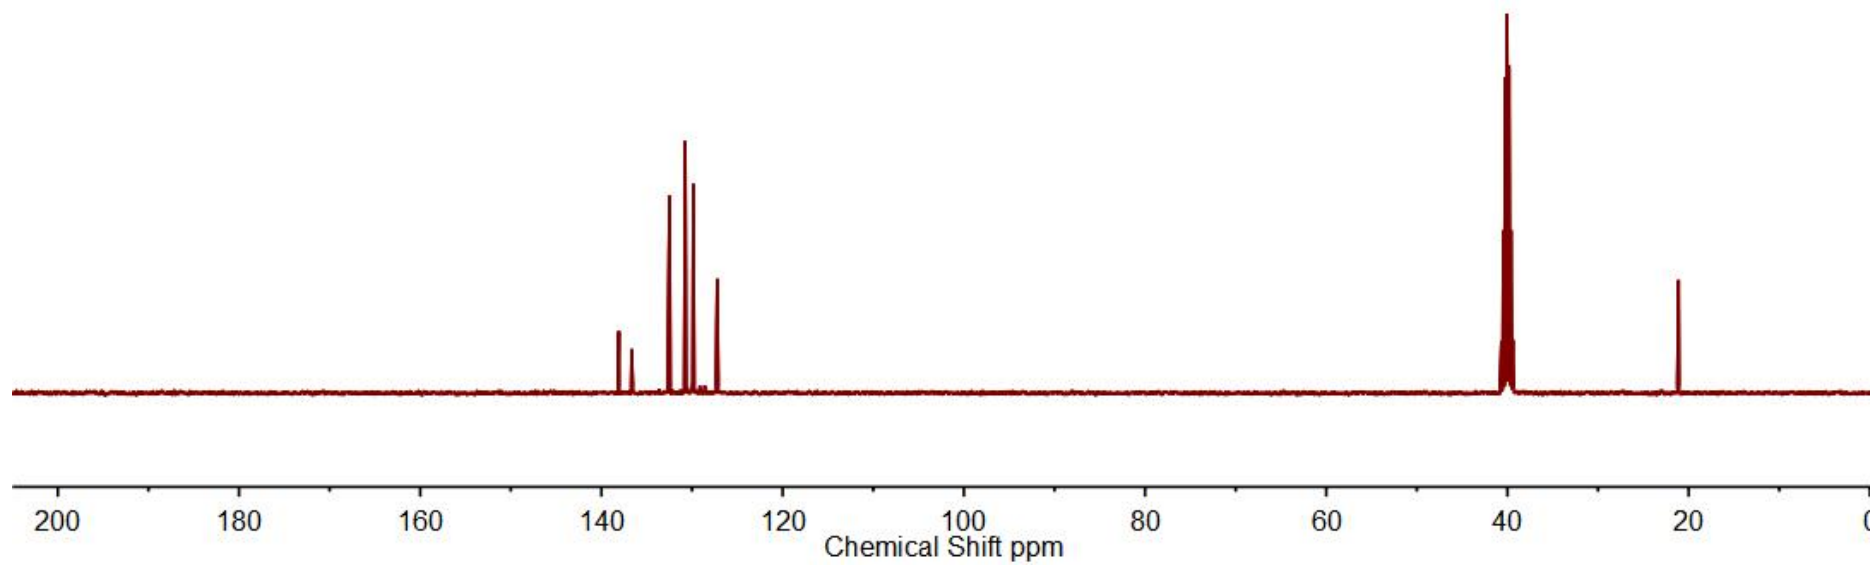

4c, DMSO-*d*<sub>6</sub>, <sup>1</sup>H NMR 400 MHz

7.44  
7.44  
7.43  
7.42  
7.42  
7.41  
7.41  
7.41  
7.39  
7.38  
7.37  
7.36  
7.36  
7.35  
7.34  
7.33  
7.32  
7.31  
7.31  
7.30  
7.29

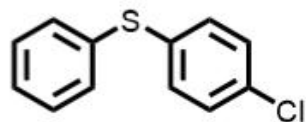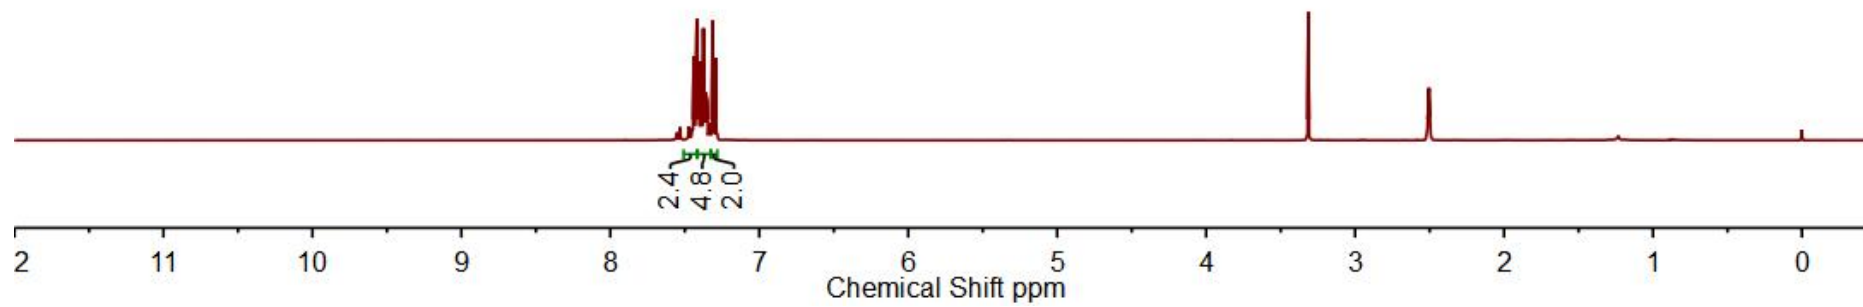



4c, DMSO-*d*<sub>6</sub>, <sup>13</sup>C NMR 101 MHz

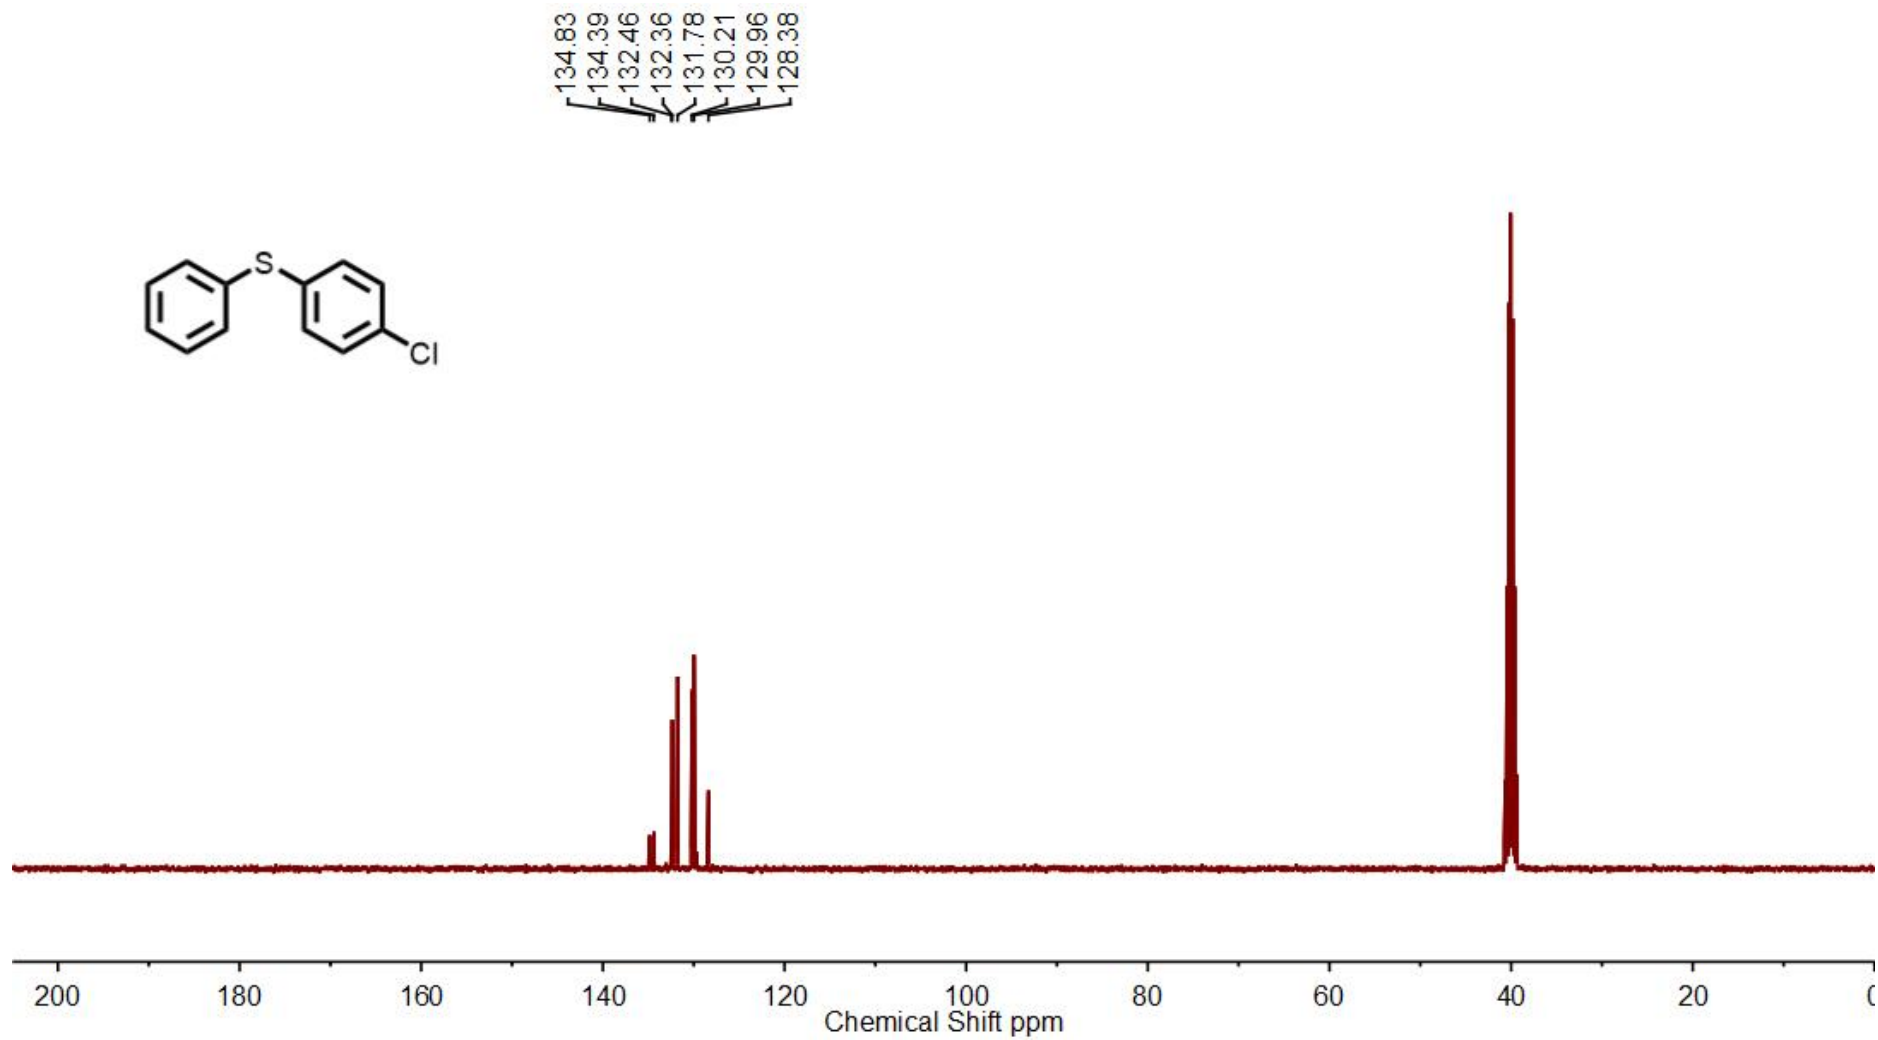

4d DMSO-*d*<sub>6</sub>, <sup>1</sup>H NMR 400 MHz

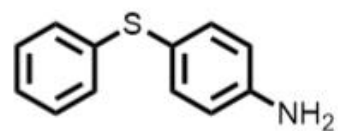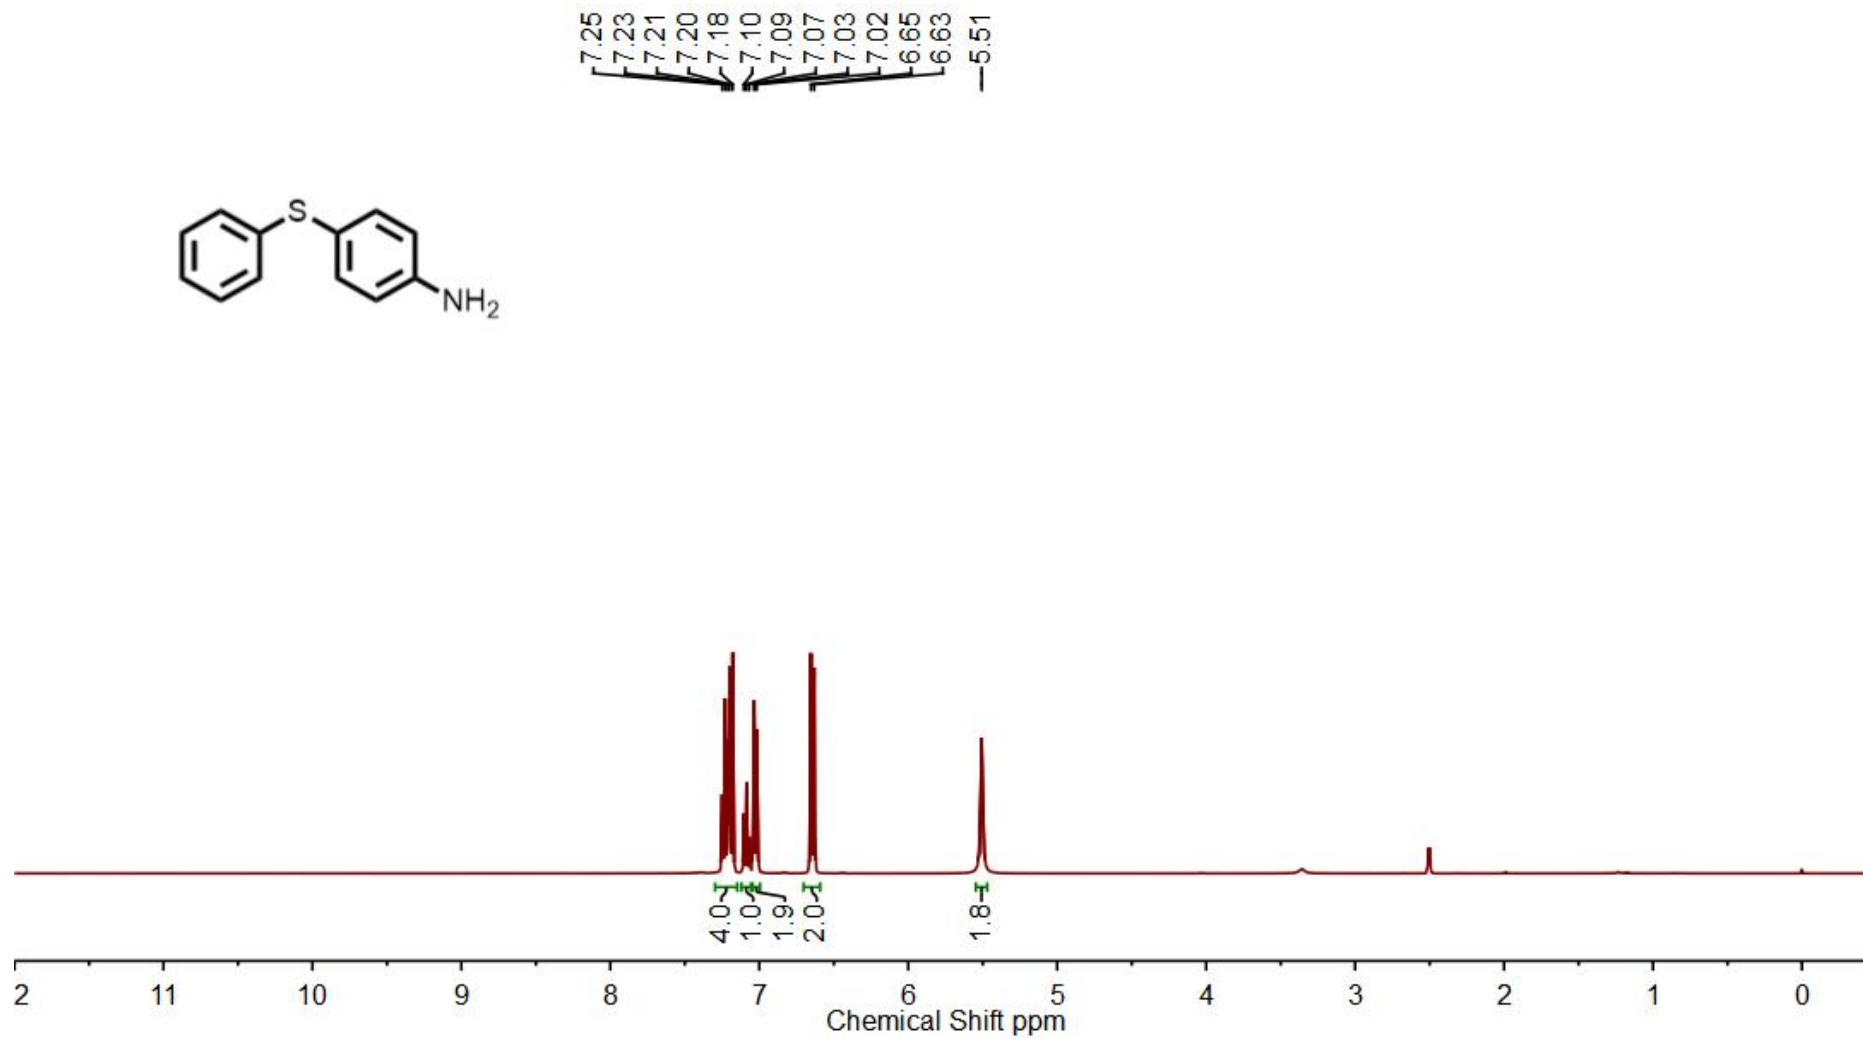

4d, DMSO-*d*<sub>6</sub>, <sup>13</sup>C NMR 101 MHz

— 150.44  
— 140.63  
— 136.84  
— 129.40  
— 126.48  
— 125.42  
— 115.33  
— 115.21

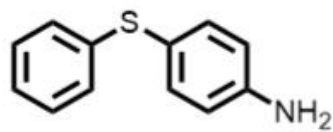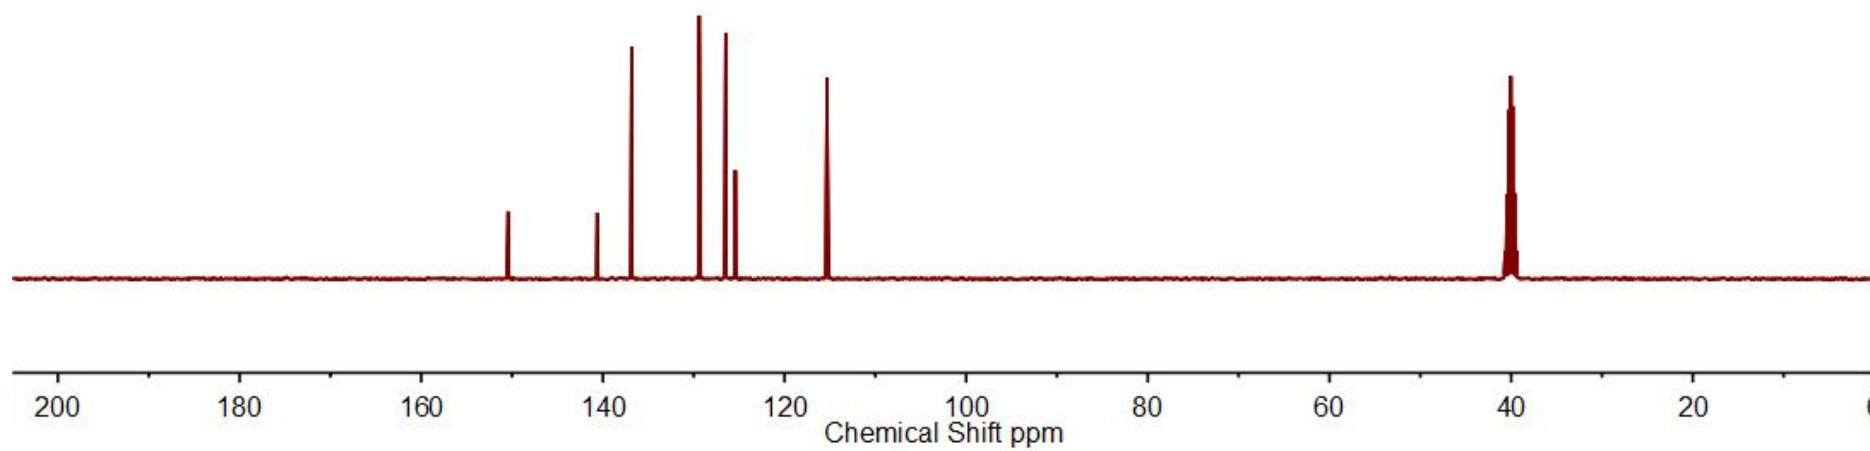

4e, CDCl<sub>3</sub>, <sup>1</sup>H NMR 300 MHz

7.39  
7.38  
7.37  
7.35  
7.35  
7.34  
7.26  
7.25  
7.24  
7.24  
7.23  
7.22  
7.21  
7.19  
7.18  
7.17  
7.16  
7.16  
7.15  
7.14  
7.14  
7.13  
7.12  
7.11  
7.11  
6.84  
6.83  
6.83  
6.81  
6.81  
6.80

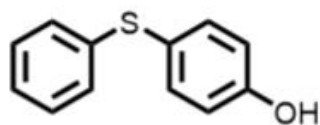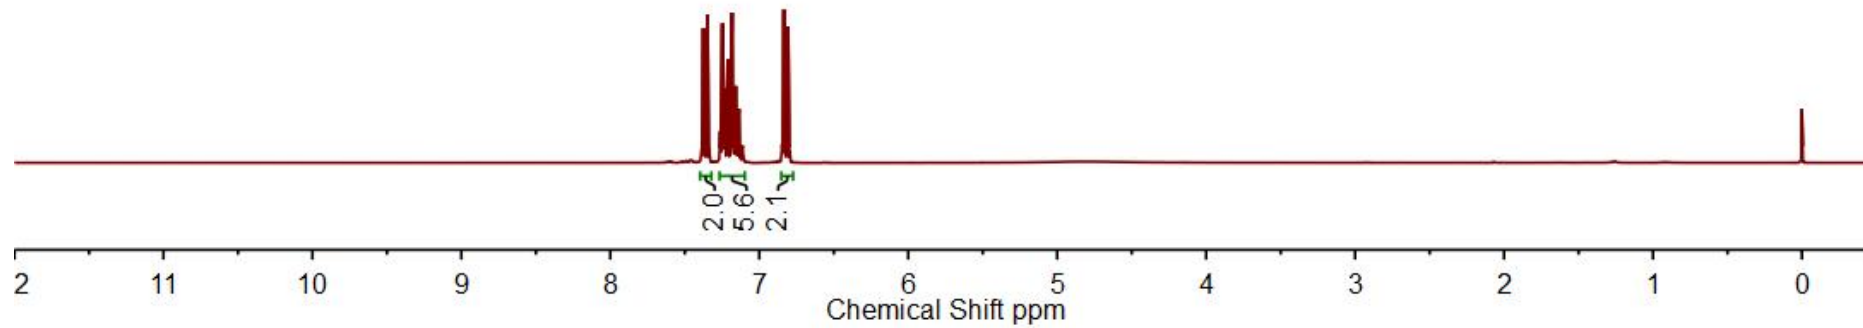

4e, CDCl<sub>3</sub>, <sup>13</sup>C NMR 75 MHz

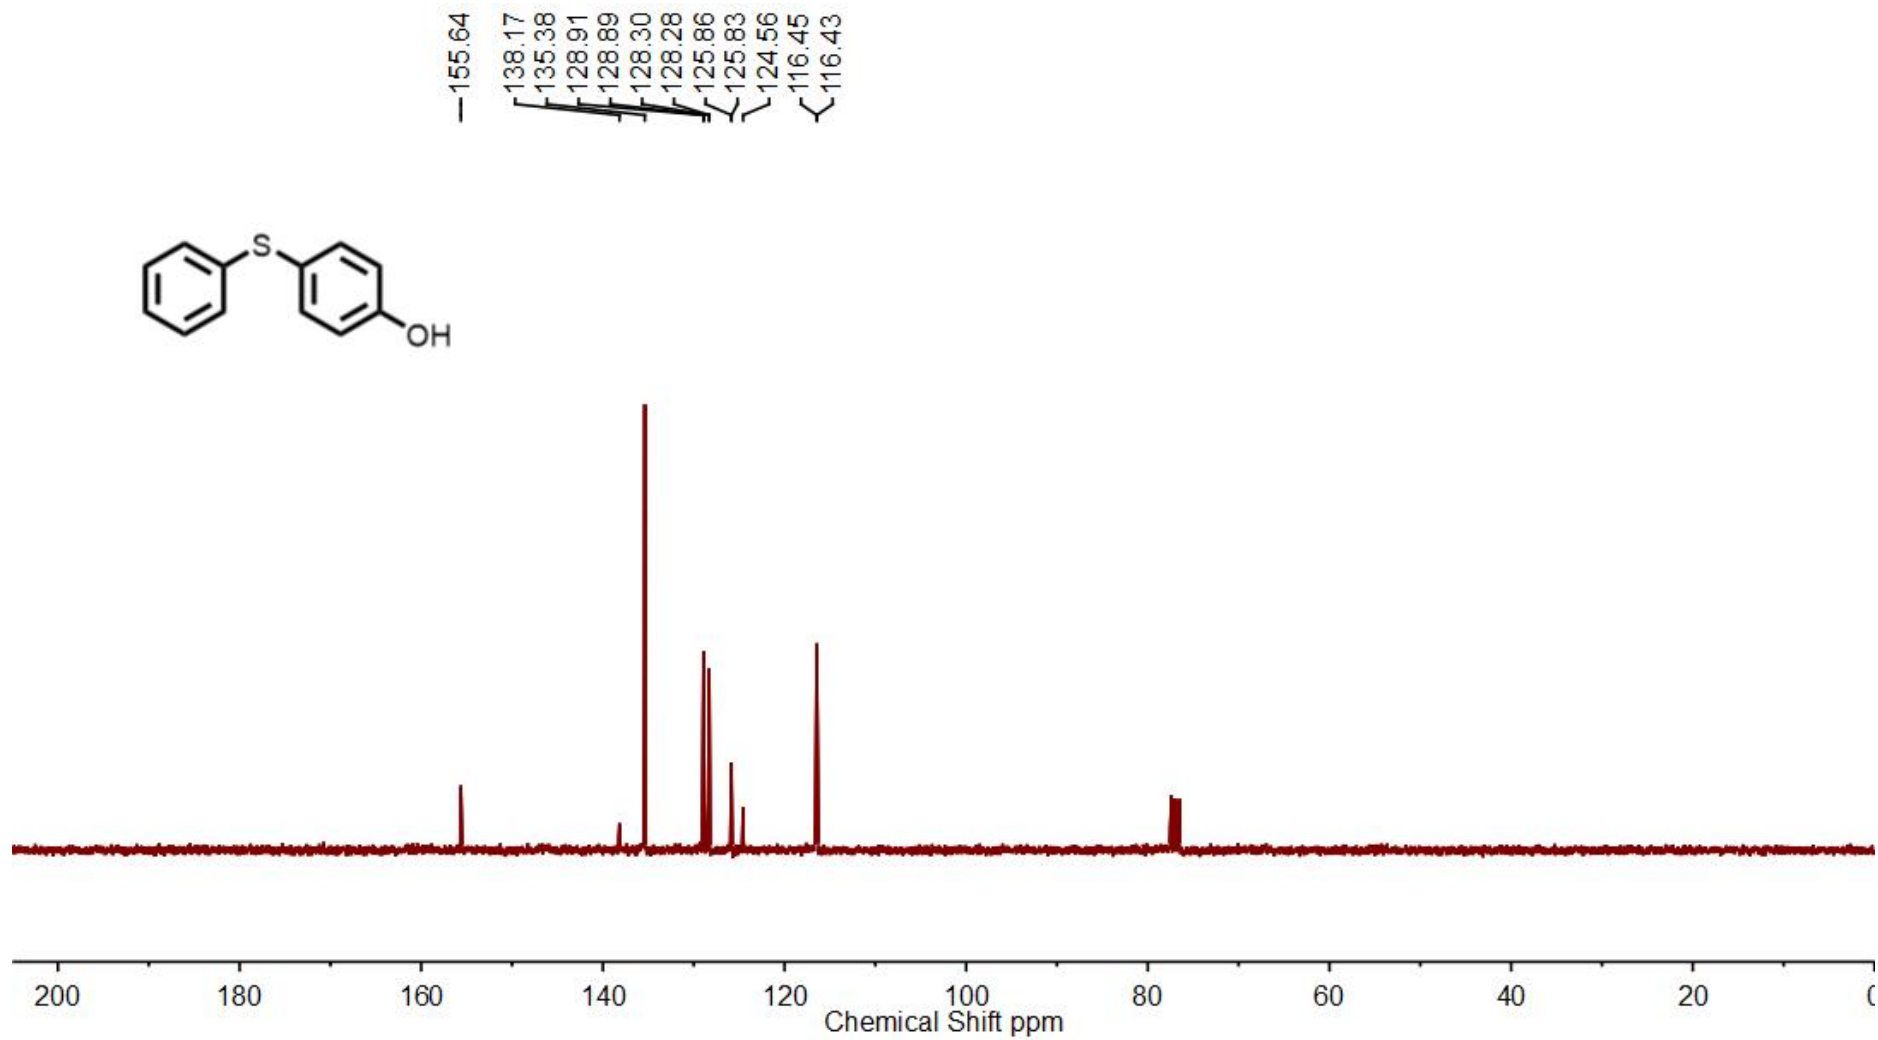

4f, DMSO-*d*<sub>6</sub>, <sup>1</sup>H NMR 300 MHz

7.33  
7.30  
7.28  
7.26  
7.23  
7.21  
7.18  
7.15  
7.13  
7.10  
7.07  
7.04  
7.04  
6.84  
6.81  
6.62  
6.60  
6.57  
5.37

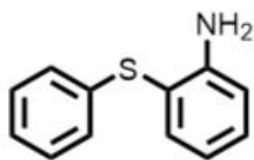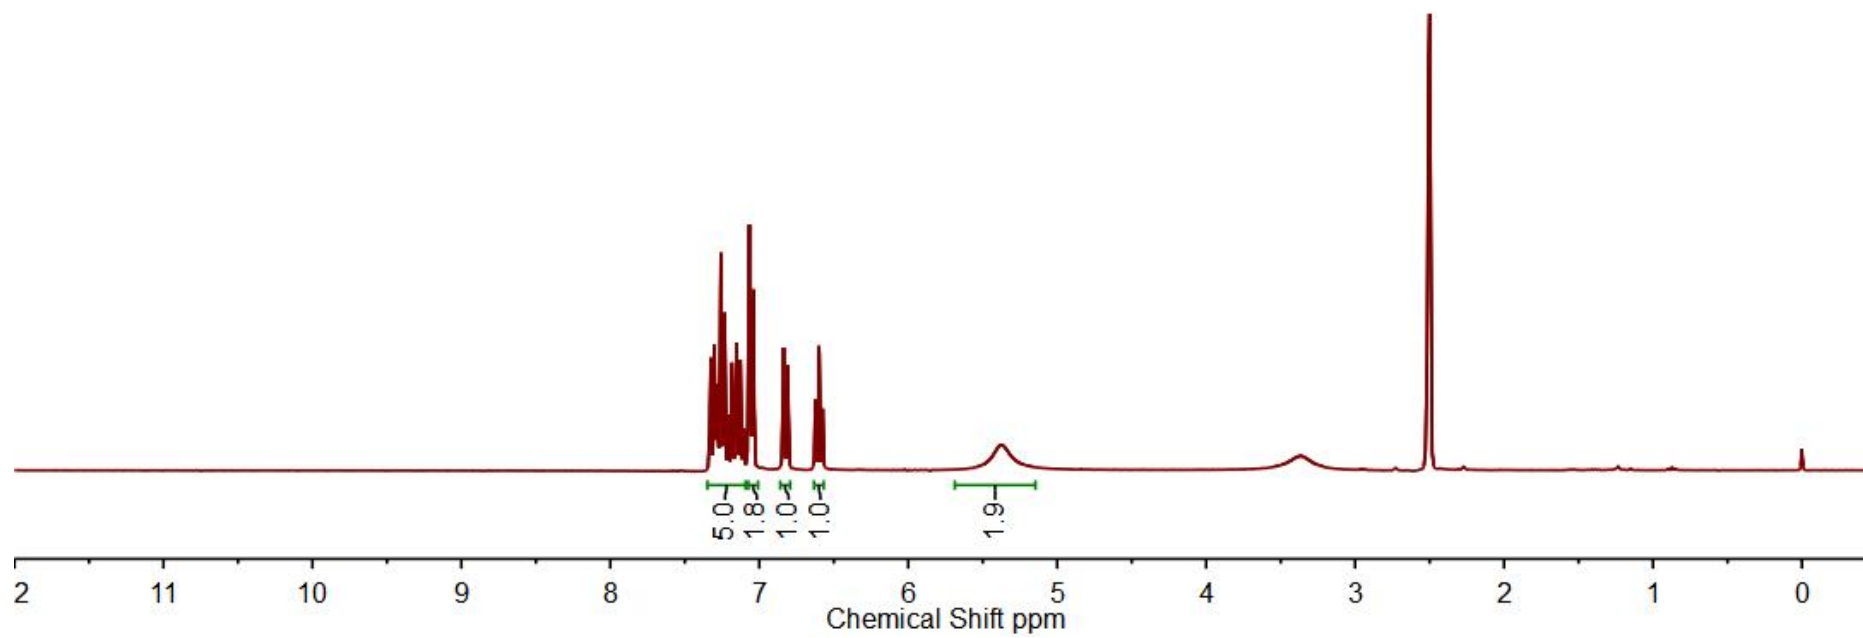

4f, DMSO-*d*<sub>6</sub>, <sup>13</sup>C NMR 75 MHz

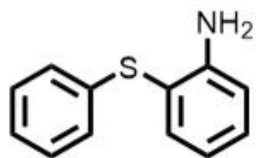

150.33  
137.01  
136.79  
131.10  
129.07  
126.39  
125.41  
116.80  
114.99  
112.02

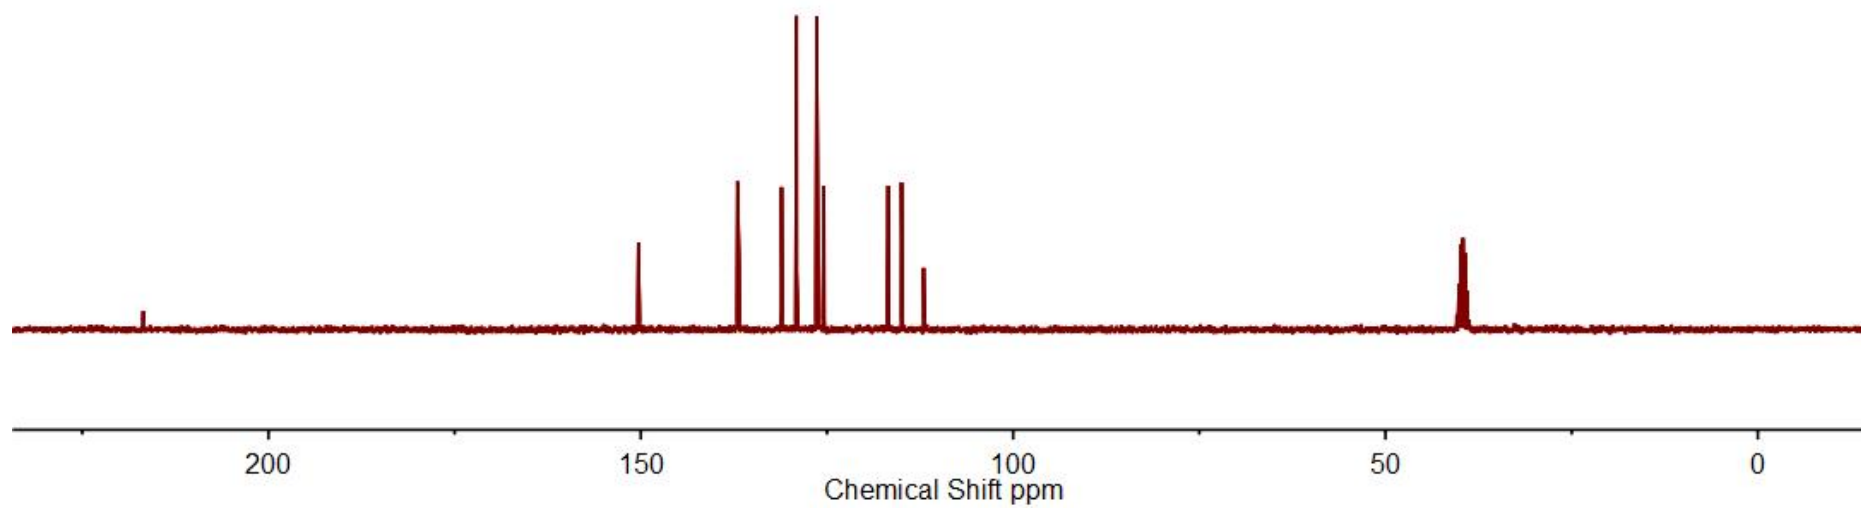

4g, DMSO-*d*<sub>6</sub>, <sup>1</sup>H NMR 400 MHz

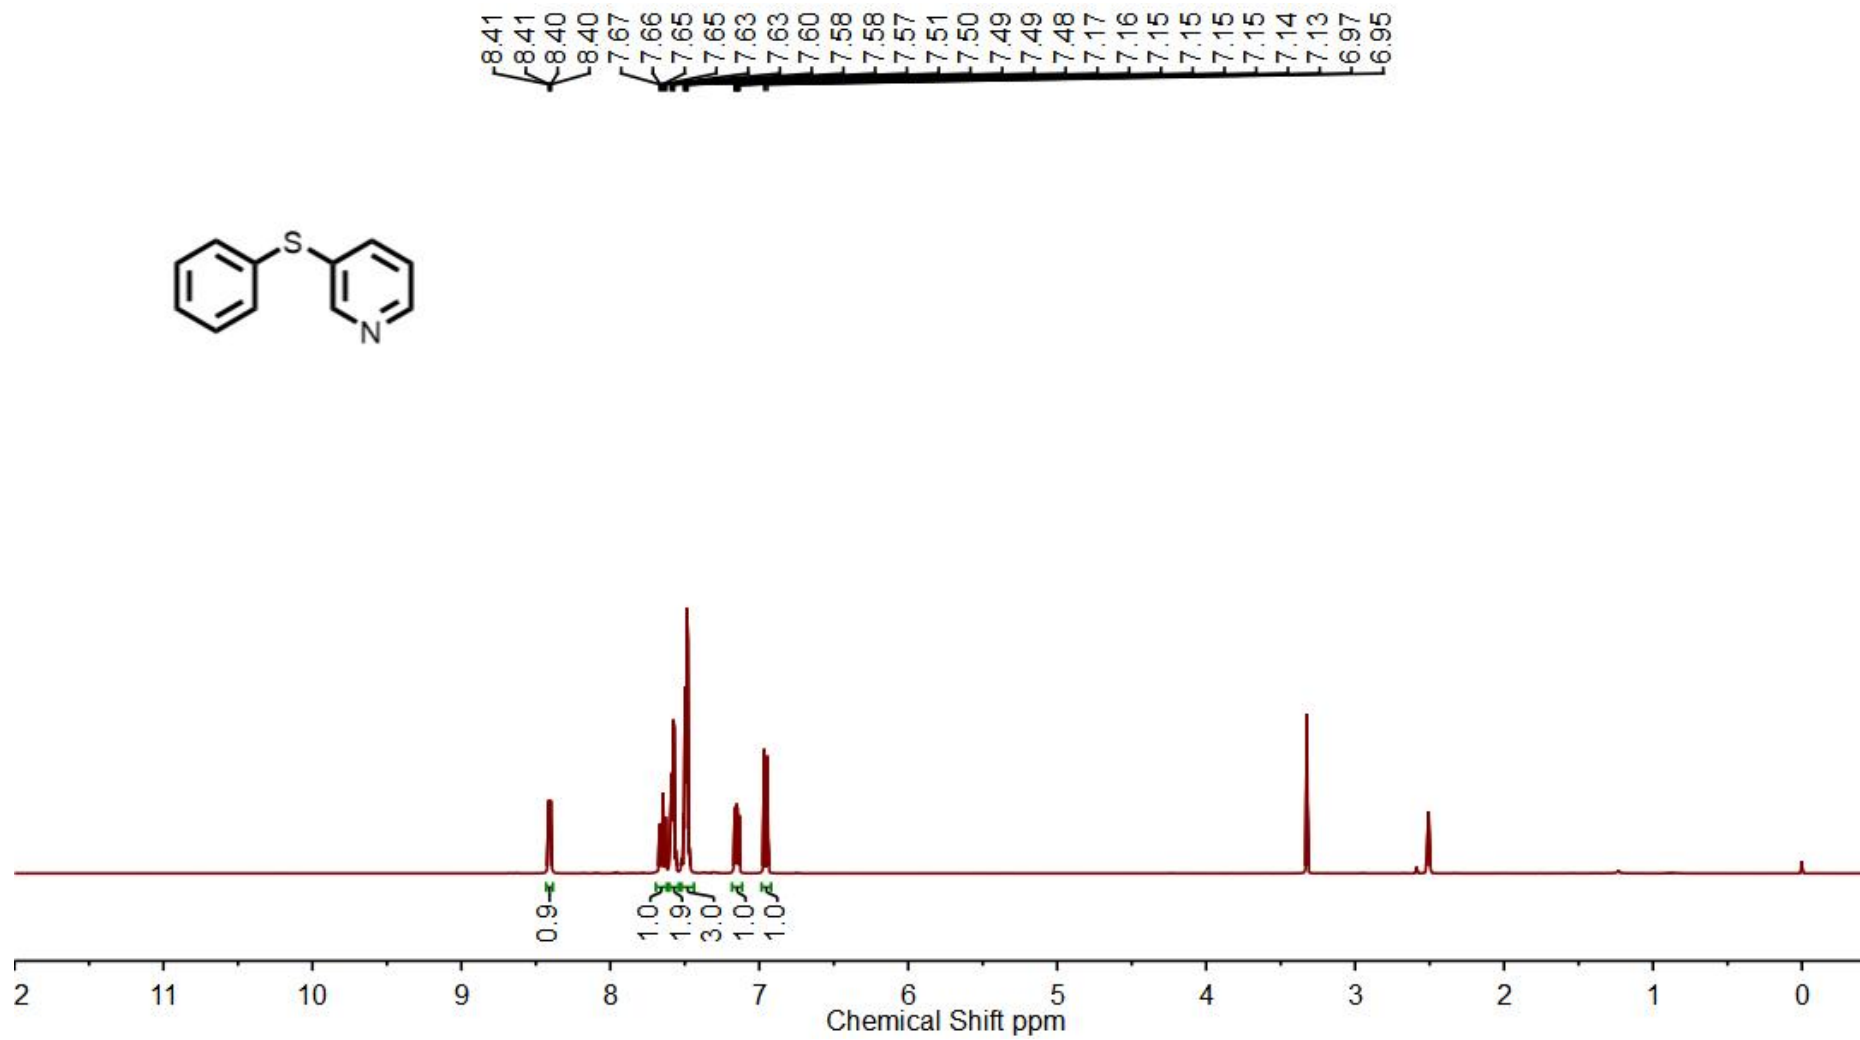



4g, DMSO-*d*<sub>6</sub>, <sup>13</sup>C NMR 101 MHz

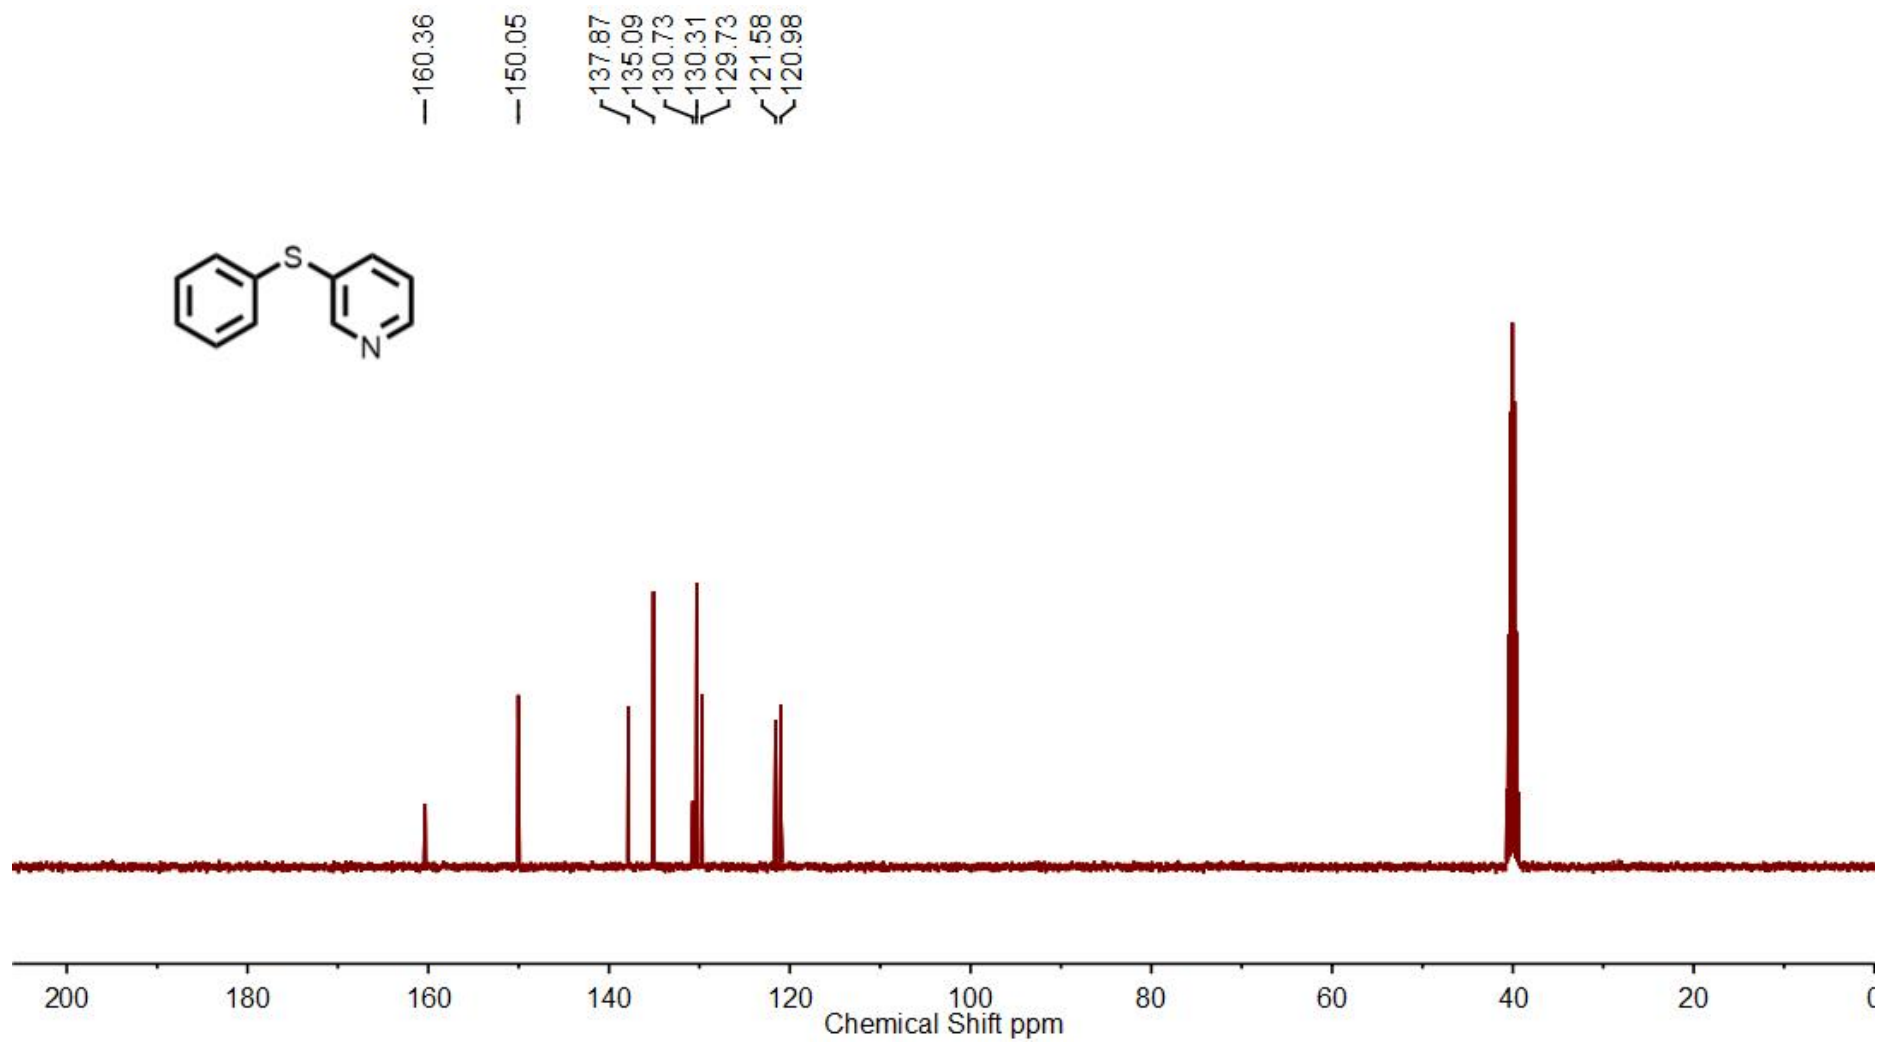

4h, DMSO-*d*<sub>6</sub>, <sup>1</sup>H NMR 400 MHz

7.86  
7.86  
7.85  
7.85  
7.82  
7.82  
7.81  
7.81  
7.34  
7.32  
7.30  
7.28  
7.27  
7.27  
7.26  
7.23  
7.21  
7.19  
7.19  
7.18  
7.17  
7.17  
7.14  
7.13  
7.13  
7.12

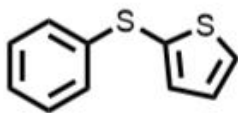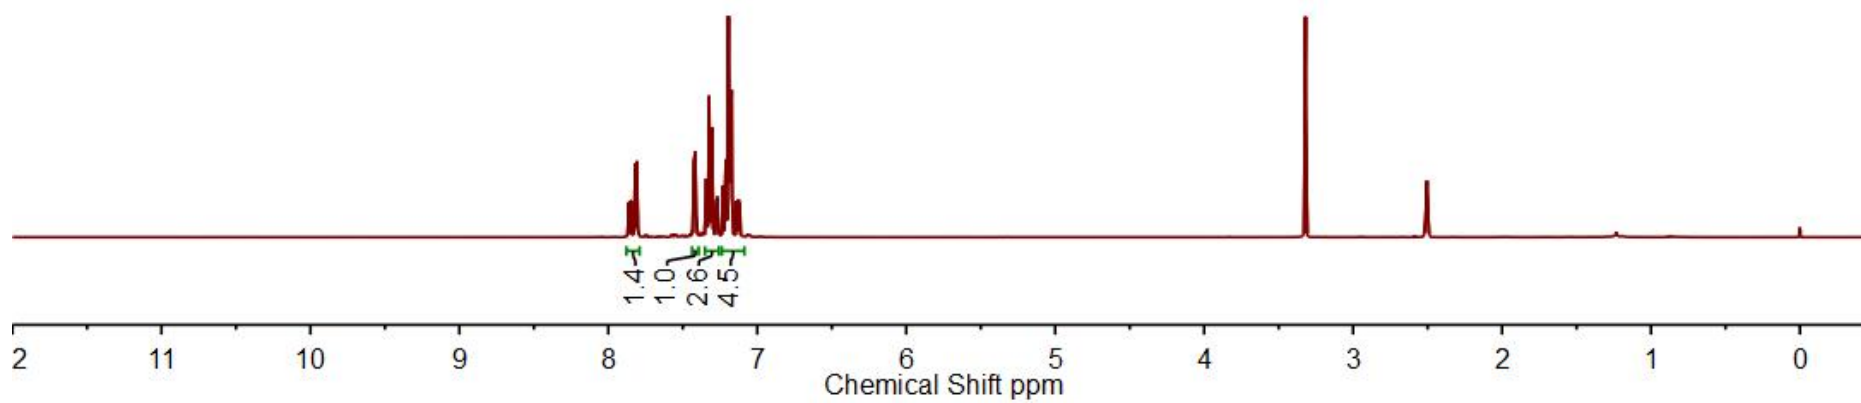

4h, DMSO-*d*<sub>6</sub>, <sup>13</sup>C NMR 101 MHz

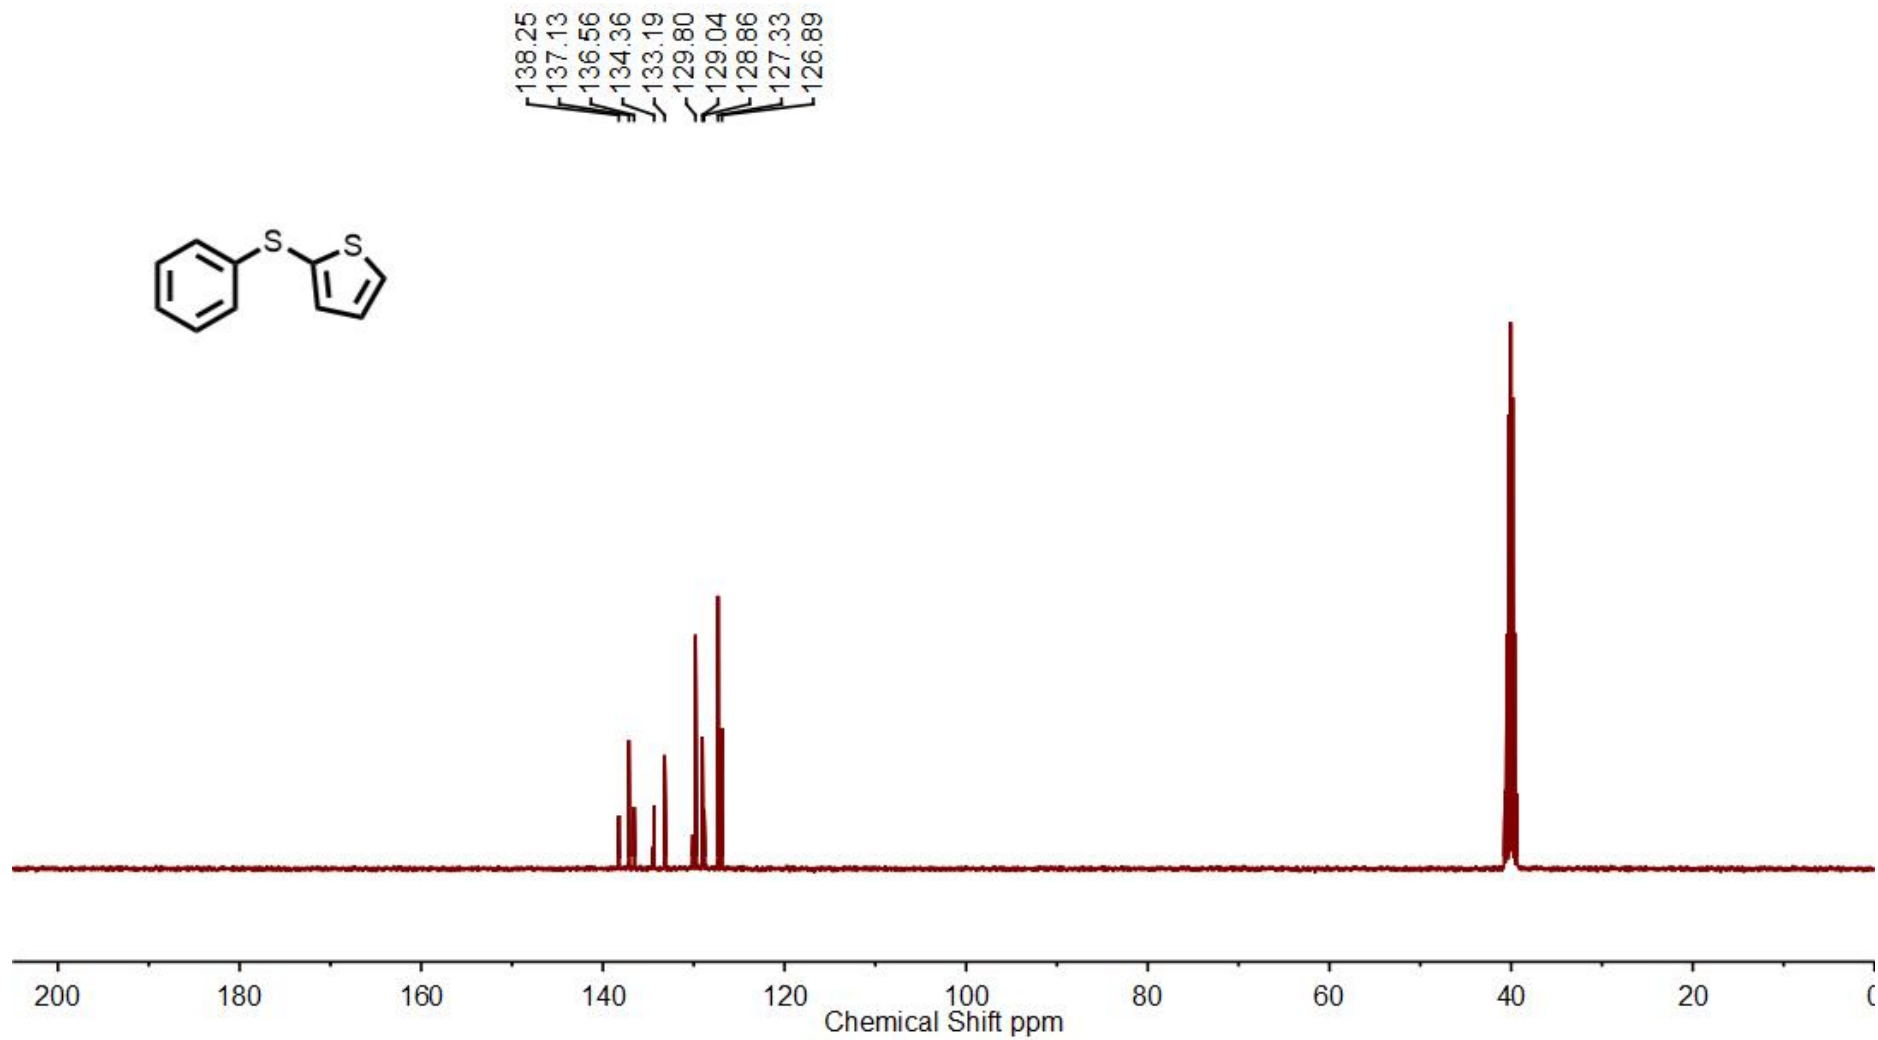

4i, DMSO-*d*<sub>6</sub>, <sup>1</sup>H NMR 400 MHz

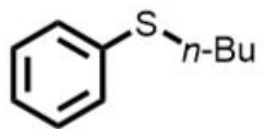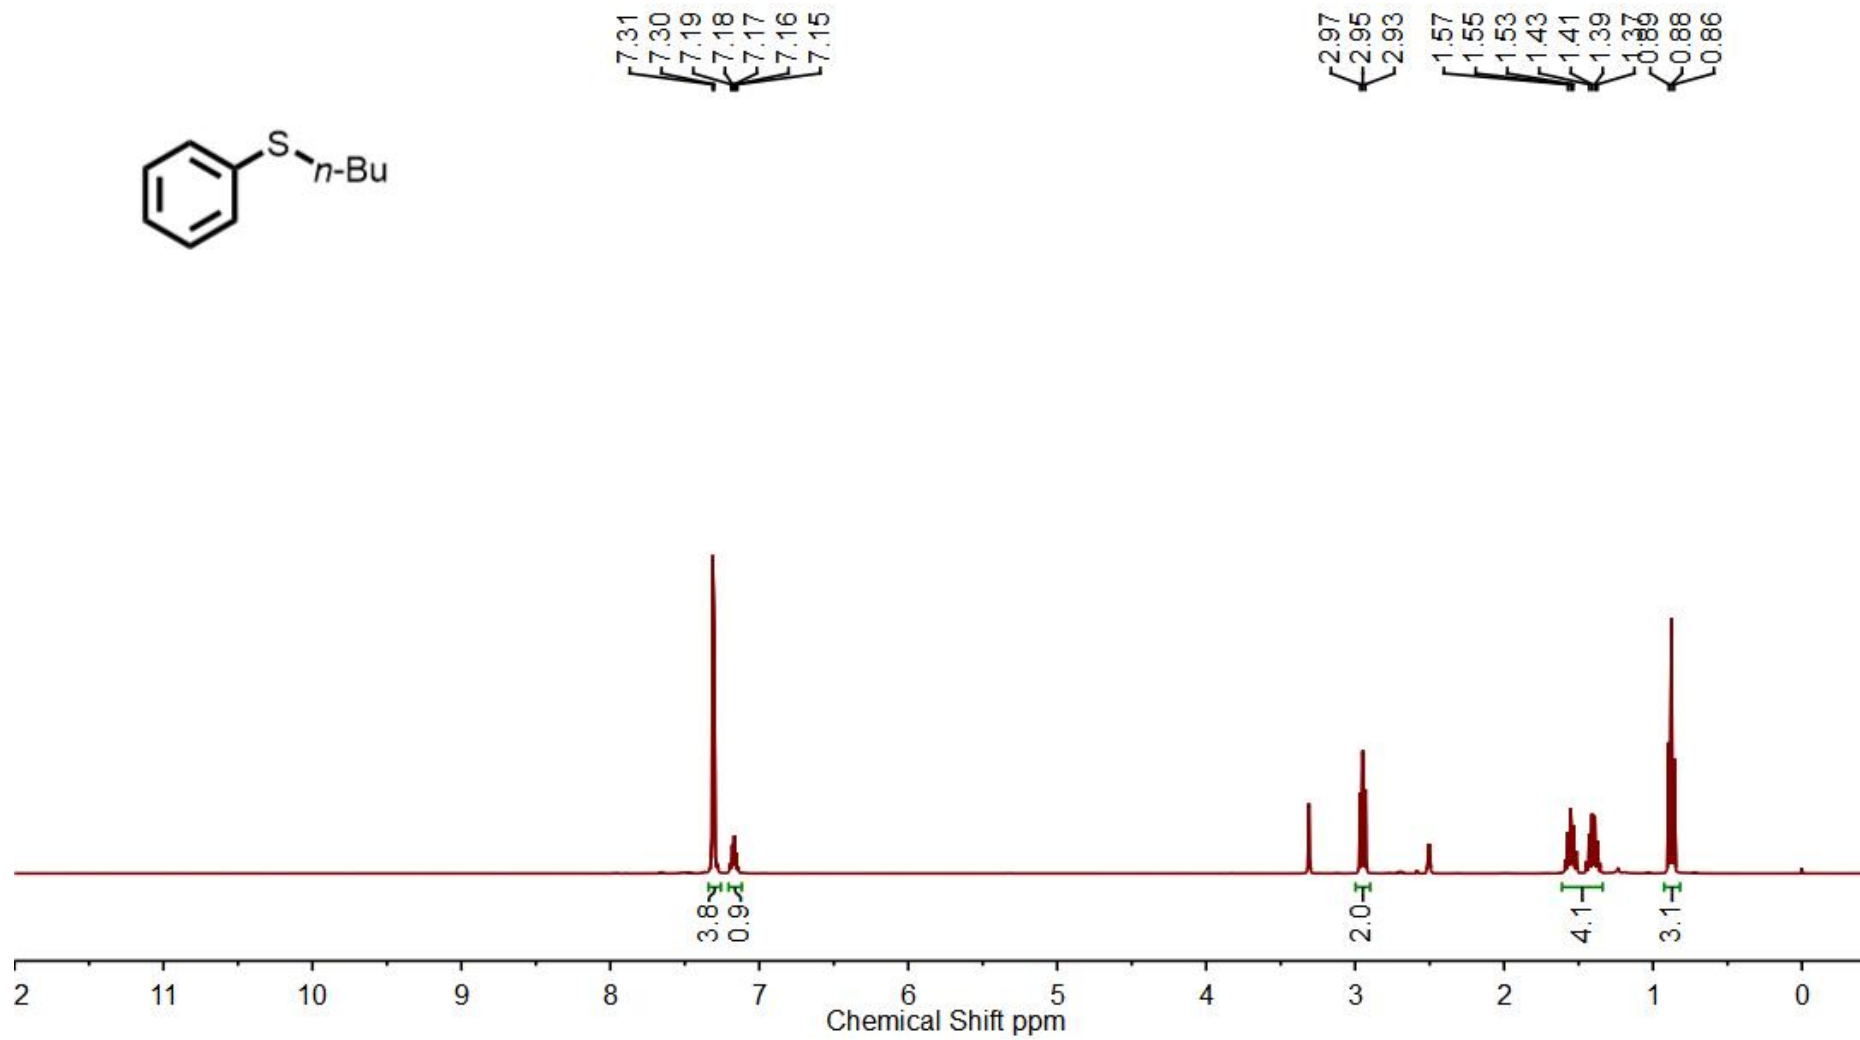

4i, DMSO-*d*<sub>6</sub>, <sup>13</sup>C NMR 101 MHz

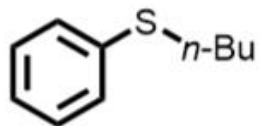

— 137.01  
— 129.45  
— 128.41  
— 125.91

— 32.16  
— 31.15  
— 21.75  
— 13.94

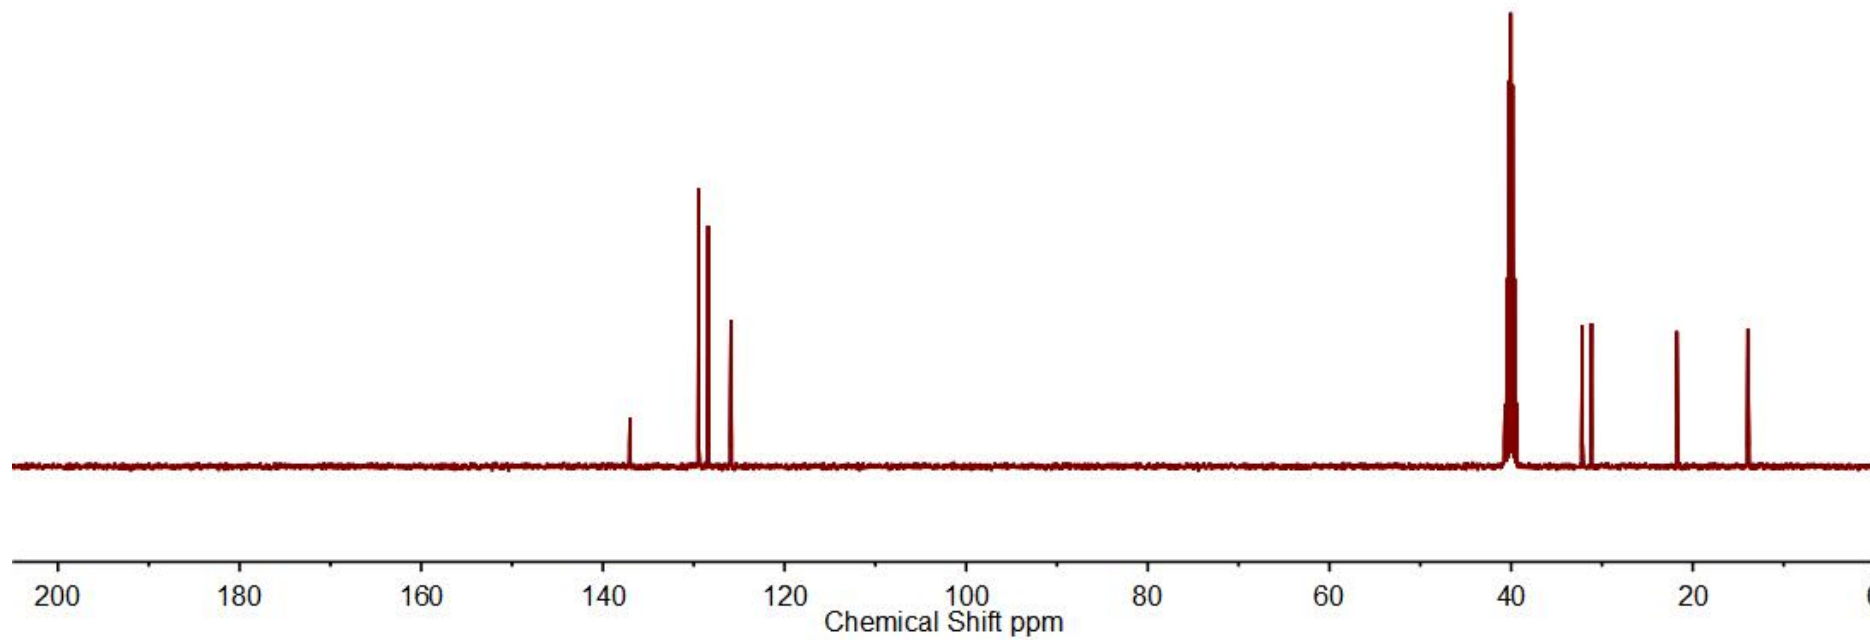

4j, DMSO-*d*<sub>6</sub>, <sup>1</sup>H NMR 400 MHz

7.38  
7.37  
7.37  
7.36  
7.35  
7.34  
7.33  
7.32  
7.30  
7.25  
7.24  
7.24  
7.23  
7.23  
7.22  
7.21  
7.21  
7.20

3.26  
3.24  
3.23  
3.22  
3.21  
1.91  
1.90  
1.89  
1.88  
1.71  
1.70  
1.69  
1.68  
1.58  
1.58  
1.56  
1.55  
1.54  
1.38  
1.37  
1.35  
1.34  
1.32  
1.31  
1.30  
1.28

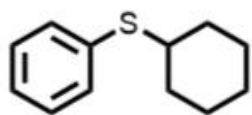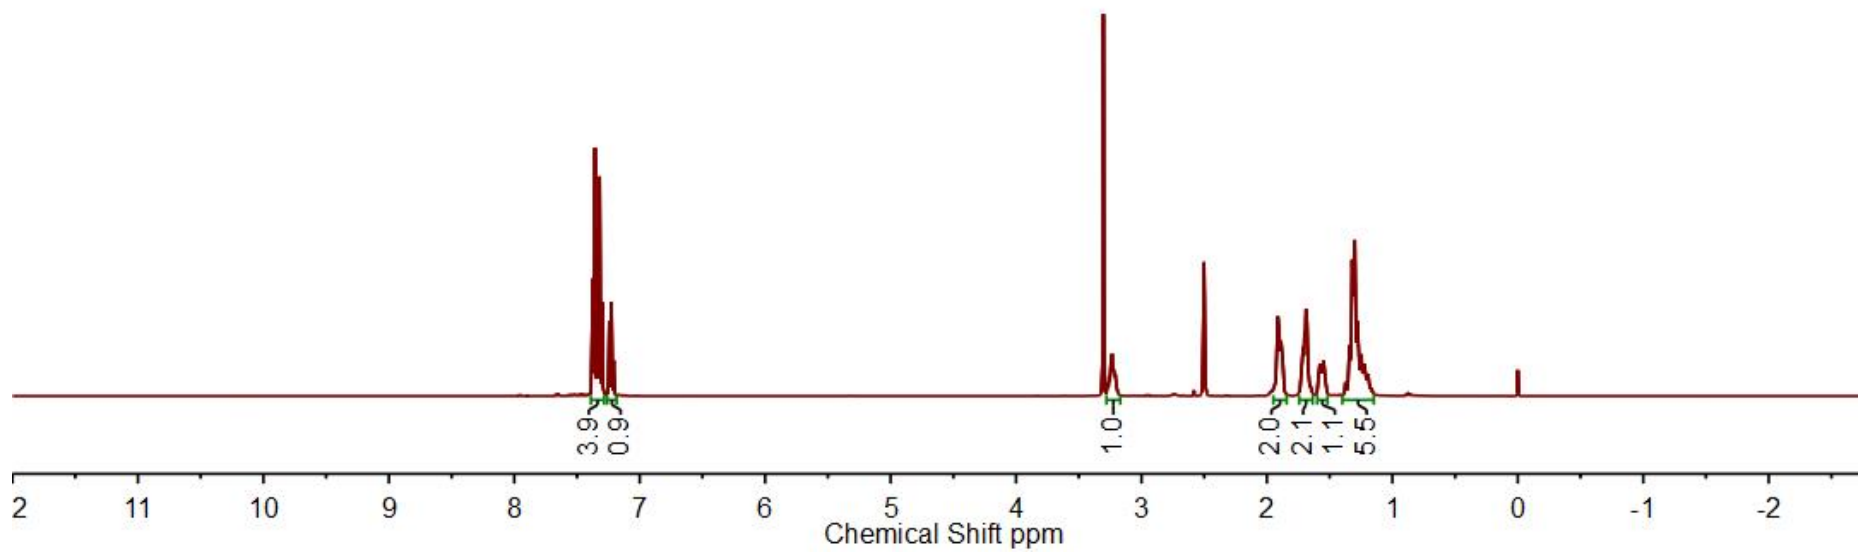

4j, DMSO-*d*<sub>6</sub>, <sup>13</sup>C NMR 101 MHz

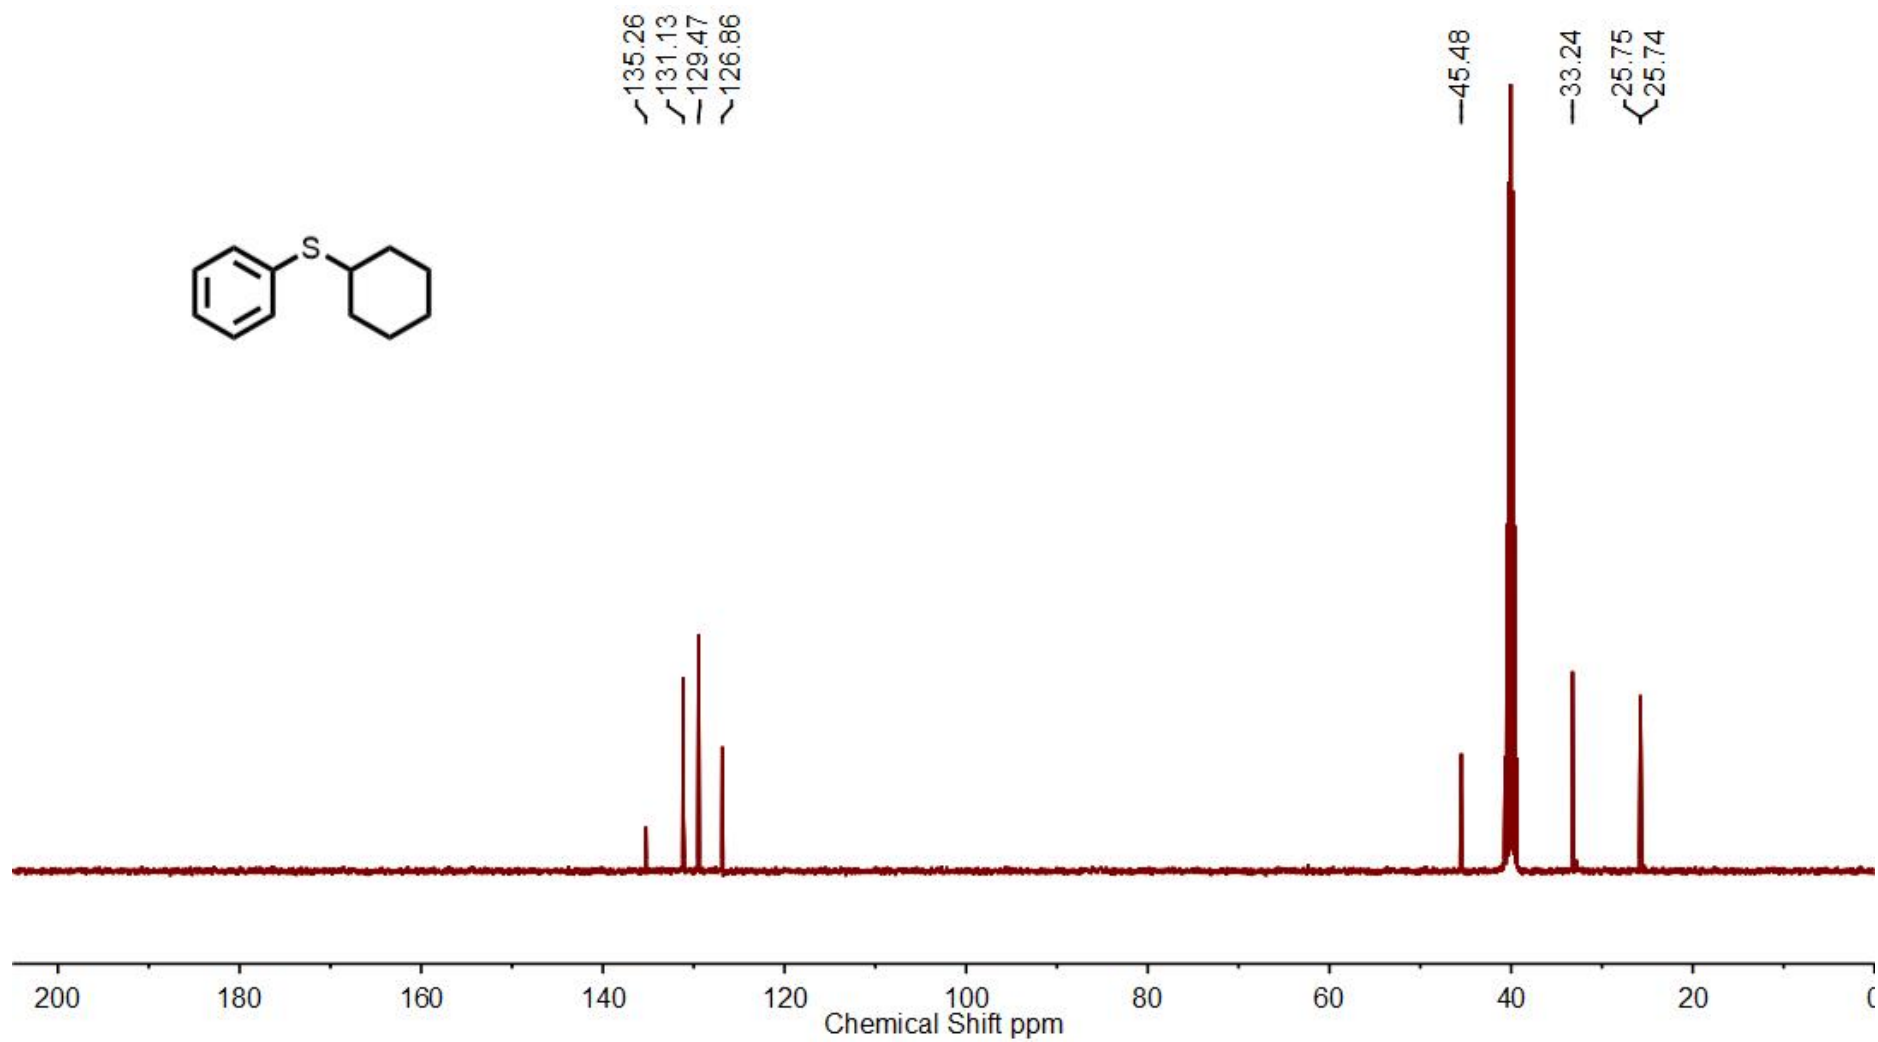

## 6. Green metrics for the C-S bond cross-coupling

**Table S2** Calculation of green metrics for the mechanochemical synthesis of diphenyl sulfide (3a)

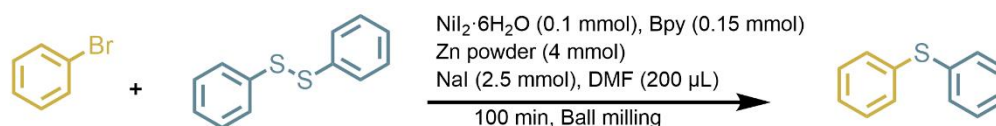

Yield of desired product (3a) = 86%

$$\text{Reaction mass efficiency (RME)} = \frac{\text{mass of product}}{\text{mass of stoichiometric reactants}} \times 100 = \frac{0.160}{0.1092 + 0.2355} \times 100 = 46\%$$

$$\text{Carbon efficiency (CE)} = \frac{\text{amount of carbon in product}}{\text{total carbon present in reactants}} \times 100 = \frac{12 \times 2}{12 + (3 \times 6)} \times 100 = 80\%$$

|             |                                           |        |           |           |
|-------------|-------------------------------------------|--------|-----------|-----------|
| Reactant 1: | diphenyl disulfide                        | 0.1092 | 1 mmol    | FW 218.34 |
| Reactant 2: | bromobenzene                              | 0.2355 | 1.5 mmol  | FW 157.01 |
| Catalyst:   | $\text{Ni}_{12}\cdot 6\text{H}_2\text{O}$ | 0.0237 | 0.1 mmol  | FW 237.69 |
| Catalyst:   | 2,2'-Dipyridyl                            | 0.0234 | 0.15 mmol | FW 156.19 |
| Catalyst:   | Zinc Powder                               | 0.2615 | 4 mmol    | FW 65.38  |
| Additive:   | NaI                                       | 0.3747 | 2.5 mmol  | FW 149.89 |
| Solvent:    | N,N-Dimethylformamide                     | 0.1896 | 2.5 mmol  | FW 73.09  |
| Product:    | diphenylsulfane                           | 0.160  | 0.86 mmol | FW 186.05 |

$$\text{E-factor} = \frac{\text{total waste}}{\text{total product}} = \frac{(0.1092 + 0.2355 + 0.0237 + 0.0234 + 0.2615 + 0.3747 + 0.1896) - 0.160}{0.160} = 6.61$$



**Table S3** Calculation of EcoScale score for the mechanochemical to synthesize diphenyl sulfide  
**(3a)**

| EcoScale points                            | Factor                                                                                                                                                                                                                                                                                        | Penalty                    |
|--------------------------------------------|-----------------------------------------------------------------------------------------------------------------------------------------------------------------------------------------------------------------------------------------------------------------------------------------------|----------------------------|
| 1 Yield                                    | 86%                                                                                                                                                                                                                                                                                           | 7                          |
| 2 Price (to obtain 10 mmol of end product) | diphenyl sulfide = 1.28 g = CNY 2.36<br>bromobenzene = 2.77 g = CNY 0.803<br>NiI <sub>2</sub> ·6H <sub>2</sub> O = 0.29 g = CNY 0.11<br>2,2'-Dipyridyl = 0.276 g = CNY 0.243<br>Zinc Powder = 3.08 g = CNY 0.055<br>NaI = 4.407g = CNY 6.699<br>DMF = 2.94 ml = CNY 0.185<br>CNY 10.46 < 10\$ | 0                          |
| 3 Safety                                   | diphenyl disulfide (N)<br>NiI <sub>2</sub> ·6H <sub>2</sub> O (N)<br>2,2'-Dipyridyl (T)<br>Zinc Powder (F)<br>NaI (N)<br>DMF (T)                                                                                                                                                              | 5<br>5<br>5<br>5<br>5<br>5 |
| 4 Technical setup                          | common setup                                                                                                                                                                                                                                                                                  | 0                          |
| 5 Temperature/time                         | room temperature, 100 min                                                                                                                                                                                                                                                                     | 1                          |
| 6 Workup and purification                  | classic chromatography                                                                                                                                                                                                                                                                        | 10                         |
| Penalty points total                       |                                                                                                                                                                                                                                                                                               | 48                         |
| EcoScale = 100 – 48 = 52                   |                                                                                                                                                                                                                                                                                               |                            |

**Table S4** Calculation of green metrics for the solution methods for the synthesis of diphenyl sulfide (**3a**) in air from phenyl disulfide and bromobenzene

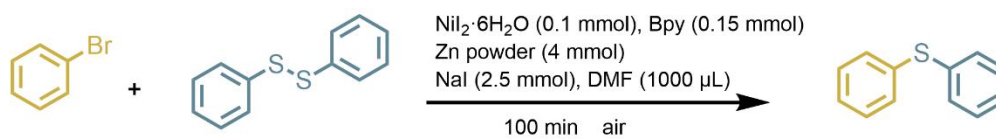

Yield of desired product (**3a**) = 21%

$$\text{Reaction mass efficiency (RME)} = \frac{\text{mass of product}}{\text{mass of stoichiometric reactants}} \times 100 = \frac{0.0391}{0.1092 + 0.2355} \times 100 = 11\%$$

$$\text{Carbon efficiency (CE)} = \frac{\text{amount of carbon in product}}{\text{total carbon present in reactants}} \times 100 = \frac{12 \times 2}{12 + (3 \times 6)} \times 100 = 80\%$$

|             |                                           |        |           |           |
|-------------|-------------------------------------------|--------|-----------|-----------|
| Reactant 1: | diphenyl disulfide                        | 0.1092 | 0.5 mmol  | FW 218.34 |
| Reactant 2: | bromobenzene                              | 0.2355 | 1.5 mmol  | FW 157.01 |
| Catalyst:   | $\text{Ni}_{12}\cdot 6\text{H}_2\text{O}$ | 0.0237 | 0.1 mmol  | FW 237.69 |
| Catalyst:   | 2,2'-Dipyridyl                            | 0.0234 | 0.15 mmol | FW 156.19 |
| Catalyst:   | Zinc Powder                               | 0.2615 | 4 mmol    | FW 65.38  |
| Additive:   | NaI                                       | 0.3747 | 2.5 mmol  | FW 149.89 |
| Solvent:    | N,N-Dimethylformamide                     | 0.944  | 12.9 mmol | FW 73.09  |
| Product:    | diphenylsulfane                           | 0.0391 | 0.21 mmol | FW 186.05 |

$$\text{E-factor} = \frac{\text{total waste}}{\text{total product}} = \frac{(0.1092 + 0.2355 + 0.0237 + 0.0234 + 0.2615 + 0.3747 + 0.944) - 0.0391}{0.0391} = 49.4$$

**Table S5** Calculation of EcoScale score for the solution methods for the synthesis of diphenyl sulfide (**3a**) in air from phenyl disulfide and bromobenzene

| EcoScale points                            | Factor                                                                                                                                                                                                                                                                                          | Penalty                    |
|--------------------------------------------|-------------------------------------------------------------------------------------------------------------------------------------------------------------------------------------------------------------------------------------------------------------------------------------------------|----------------------------|
| 1 Yield                                    | 21%                                                                                                                                                                                                                                                                                             | 39.5                       |
| 2 Price (to obtain 10 mmol of end product) | diphenyl sulfide = 1.28 g = CNY 2.36<br>bromobenzene = 2.77 g = CNY 0.803<br>NiI <sub>2</sub> ·6H <sub>2</sub> O = 0.29 g = CNY 0.11<br>2,2'-Dipyridyl = 0.276 g = CNY 0.243<br>Zinc Powder = 3.08 g = CNY 0.055<br>NaI = 4.407g = CNY 6.699<br>DMF = 166.50 ml = CNY 10.47<br>CNY 20.74 < 10\$ | 0                          |
| 3 Safety                                   | diphenyl disulfide (N)<br>NiI <sub>2</sub> ·6H <sub>2</sub> O (N)<br>2,2'-Dipyridyl (T)<br>Zinc Powder (F)<br>NaI (N)<br>DMF (T)                                                                                                                                                                | 5<br>5<br>5<br>5<br>5<br>5 |
| 4 Technical setup                          | common setup                                                                                                                                                                                                                                                                                    | 0                          |
| 5 Temperature/time                         | room temperature, 100 min                                                                                                                                                                                                                                                                       | 1                          |
| 6 Workup and purification                  | classic chromatography                                                                                                                                                                                                                                                                          | 10                         |
| Penalty points total                       |                                                                                                                                                                                                                                                                                                 | 80.5                       |

EcoScale = 100 – 80.5 = 19.5 (< 50; so, it is an unacceptable synthesis)

**Table S6** Calculation of green metrics for the solution methods for the synthesis of diphenyl sulfide (**3a**) in N<sub>2</sub> from phenyl disulfide and bromobenzene

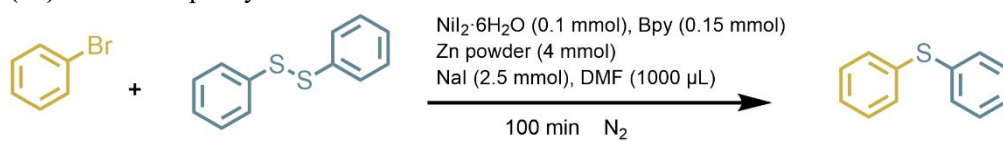

**Yield of desired product (3a) = 13%**

$$\text{Reaction mass efficiency (RME)} = \frac{\text{mass of product}}{\text{mass of stoichiometric reactants}} \times 100 = \frac{0.0242}{0.1092 + 0.2355} \times 100 = 7\%$$

$$\text{Carbon efficiency (CE)} = \frac{\text{amount of carbon in product}}{\text{total carbon present in reactants}} \times 100 = \frac{12 \times 2}{12 + (3 \times 6)} \times 100 = 80\%$$

|             |                                     |        |           |           |
|-------------|-------------------------------------|--------|-----------|-----------|
| Reactant 1: | diphenyl disulfide                  | 0.1092 | 0.5 mmol  | FW 218.34 |
| Reactant 2: | bromobenzene                        | 0.2355 | 1.5 mmol  | FW 157.01 |
| Catalyst:   | Ni <sub>12</sub> ·6H <sub>2</sub> O | 0.0237 | 0.1 mmol  | FW 237.69 |
| Catalyst:   | 2,2'-Dipyridyl                      | 0.0234 | 0.15 mmol | FW 156.19 |
| Catalyst:   | Zinc Powder                         | 0.2615 | 4 mmol    | FW 65.38  |
| Additive:   | Nal                                 | 0.3747 | 2.5 mmol  | FW 149.89 |
| Solvent:    | N,N-Dimethylformamide               | 0.944  | 12.9 mmol | FW 73.09  |
| Product:    | diphenylsulfane                     | 0.0242 | 0.13 mmol | FW 186.05 |

$$\text{E-factor} = \frac{\text{total waste}}{\text{total product}} = \frac{(0.1092 + 0.2355 + 0.0237 + 0.0234 + 0.2615 + 0.3747 + 0.944) - 0.0242}{0.0242} = 80.5$$

**Table S7** Calculation of EcoScale score for the solution methods for the synthesis of diphenyl sulfide (**3a**) in N<sub>2</sub> from phenyl disulfide and bromobenzene

| EcoScale points                                                          | Factor                                                                                                                                                                                                                                                                                          | Penalty                    |
|--------------------------------------------------------------------------|-------------------------------------------------------------------------------------------------------------------------------------------------------------------------------------------------------------------------------------------------------------------------------------------------|----------------------------|
| 1 Yield                                                                  | 13%                                                                                                                                                                                                                                                                                             | 43.5                       |
| 2 Price (to obtain 10 mmol of end product)                               | diphenyl sulfide = 1.28 g = CNY 2.36<br>bromobenzene = 2.77 g = CNY 0.803<br>NiI <sub>2</sub> ·6H <sub>2</sub> O = 0.29 g = CNY 0.11<br>2,2'-Dipyridyl = 0.276 g = CNY 0.243<br>Zinc Powder = 3.08 g = CNY 0.055<br>NaI = 4.407g = CNY 6.699<br>DMF = 166.50 ml = CNY 10.47<br>CNY 20.74 < 10\$ | 0                          |
| 3 Safety                                                                 | diphenyl disulfide (N)<br>NiI <sub>2</sub> ·6H <sub>2</sub> O (N)<br>2,2'-Dipyridyl (T)<br>Zinc Powder (F)<br>NaI (N)<br>DMF (T)                                                                                                                                                                | 5<br>5<br>5<br>5<br>5<br>5 |
| 4 Technical setup                                                        | common setup                                                                                                                                                                                                                                                                                    | 0                          |
| 5 Temperature/time                                                       | room temperature, 100 min                                                                                                                                                                                                                                                                       | 1                          |
| 6 Workup and purification                                                | classic chromatography                                                                                                                                                                                                                                                                          | 10                         |
| Penalty points total                                                     |                                                                                                                                                                                                                                                                                                 | 84.5                       |
| EcoScale = 100 – 80.5 = 15.5 (< 50; so, it is an unacceptable synthesis) |                                                                                                                                                                                                                                                                                                 |                            |

# References

- [1] A. C. Jones, W. I. Nicholson, H. R. Smallman and D. L. Browne, A Robust Pd-Catalyzed C–S Cross-Coupling Process Enabled by Ball-Milling, *Org. Lett.*, 2020, **22**, 7433.
- [2] E. Cui, D. Qiao, H. Li, L. Guo, C.-H. Tung and Y. Wang, Engaging Ag(0) single atoms in silver(I) salts-mediated C-B and C-S coupling under visible light irradiation, *J Catal.*, 2021, **402**, 255.
- [3] K. D. Jones, D. J. Power, D. Bierer, K. M. Gericke and S. G. Stewart, Nickel Phosphite/Phosphine-Catalyzed C–S Cross-Coupling of Aryl Chlorides and Thiols, *Org. Lett.*, 2018, **20**, 208.
- [4] M. Jiang, H. Li, H. Yang and H. Fu, Room-Temperature Arylation of Thiols: Breakthrough with Aryl Chlorides, *Angew. Chem. Int. Ed.*, 2016, **55**, 1.
- [5] R. Sikari, S. Sinha, S. Das, A. Saha, G. Chakraborty, R. Mondal and N. D. Paul, Achieving Nickel Catalyzed C-S Cross Coupling under Mild Conditions using Metal-Ligand Cooperativity, *J. Org. Chem.*, 2019, **84**, 4072.
- [6] R. Panigrahi, S. K. Sahu, P. K. Behera, S. Panda and L. Rout, CuMoO<sub>4</sub> Bimetallic Nanoparticles, An Efficient Catalyst for Room Temperature C-S Cross-coupling of Thiols and Haloarenes, *Chem. Eur. J.*, 2020, **26**, 620.
- [7] G. Shen, Q. Lu, Z. Wang, W. Sun, Y. Zhang, X. Huang, M. Sun and Z. Wang, Environmentally Friendly and Recyclable CuCl<sub>2</sub>-Mediated C–S Bond Coupling Strategy Using DMEDA as Ligand, Base, and Solvent, *Synthesis*, 2022, **54**, 184.
- [8] A. Kumar, B. S. Bhakuni, C. D. Prasad, S. Kumar and S. Kumar, Potassium tert-butoxide-mediated synthesis of unsymmetrical diaryl ethers, sulfides and selenides from aryl bromides, *Tetrahedron*, 2013, **69**, 5383.
- [9] C.-W. Chen, Y.-L. Chen, D. M. Reddy, K. Du, C.-E. Li, B.-H. Shih, Y.-J. Xue and C.-F. Lee, CuI/Oxalic Diamide-Catalyzed Cross-Coupling of Thiols with Aryl Bromides and Chlorides, *Chem. Eur. J.*, 2017, **23**, 10087.
- [10] M. A. Fernández-Rodríguez and J. F. Hartwig, A General, Efficient, and Functional-Group-Tolerant Catalyst System for the Palladium-Catalyzed Thioetherification of Aryl Bromides and Iodides, *J. Org. Chem.*, 2009, **74**, 1663.
- [11] Y.-C. Wong, T. T. Jayanth and C.-H. Cheng, Cobalt-Catalyzed Aryl–Sulfur Bond Formation, *Org. Lett.*, 2006, **8**, 5613.
- [12] A. C. S. Reddy and P. Anbarasan, Rhodium-Catalyzed Rearrangement of S/Se-Ylides for the Synthesis of Substituted Vinylogous Carbonates, *Org. Lett.*, 2019, **21**, 9965.
- [13] A. M. Wagner and M. S. Sanford, Transition-Metal-Free Acid-Mediated Synthesis of Aryl Sulfides from Thiols and Thioethers, *J. Org. Chem.*, 2014, **79**, 2263.
